# Supplementary material for: Highly economical and direct amination of sp3 carbon using low-cost nickel pincer catalyst
Source: Royal Society of Chemistry journal article supplement (doi:10.1039/d0ra09639c), 2021-01-01
Supplement: d0ra09639c1.pdf [file d0ra09639c1.pdf]

**Supporting Information**

**Highly economical and direct amination of  $sp^3$  carbon using low-cost  
Nickel Pincer catalyst**

Andrew Brandt<sup>1†</sup>, Ambar B. RanguMagar<sup>1†</sup>, Peter Szwedo<sup>1</sup>, Hunter A. Wayland<sup>1</sup>, Charlette M. Parnell<sup>1</sup>, Pradip Munshi<sup>2\*</sup>, and Anindya Ghosh<sup>1\*</sup>

<sup>1</sup>*Department of Chemistry, University of Arkansas at Little Rock, 2801 South University Avenue, Little Rock, AR 72204, USA*

<sup>2</sup>*Research Center, Reliance Industries Limited, Vadodara, Gujarat 391346, India*

† Equally contributed authors

\*corresponding author

E-mail: axghosh@ualr.edu, Phone: 501 569 8827, Fax: 501 569 8838

Email: pradip.munshi@ril.com, Phone: +91 265 261 6066

## Contents

### Supplementary Tables and Figures:

|                                                                  |          |
|------------------------------------------------------------------|----------|
| Optimization of base and solvent                                 | Table S1 |
| Optimization of temperature and time                             | Fig. S1  |
| Synthesis of N-propylbenzenemethanamine                          | Fig. S2  |
| Synthesis of N-butylbenzenemethanamine                           | Fig. S3  |
| Synthesis of N-pentylbenzenemethanamine                          | Fig. S4  |
| Synthesis of N-hexylbenzenemethanamine                           | Fig. S5  |
| Synthesis of N-heptylbenzenemethanamine                          | Fig. S6  |
| Synthesis of N-octylbenzenemethanamine                           | Fig. S7  |
| Synthesis of N-nonylbenzenemethanamine                           | Fig. S8  |
| Synthesis of N-decylbenzenemethanamine                           | Fig. S9  |
| Synthesis of N-phenylbenzenemethanamine                          | Fig. S10 |
| Synthesis of dibenzylamine                                       | Fig. S11 |
| Synthesis of $\alpha$ -methyl-N-(phenylmethyl)benzenemethanamine | Fig. S12 |
| Synthesis of N-(3-methylbutyl)benzenemethanamine                 | Fig. S13 |
| Synthesis of pyrrolidine                                         | Fig. S14 |
| Synthesis of 1-methylpyrrolidine                                 | Fig. S15 |
| Synthesis of 1-ethylpyrrolidine                                  | Fig. S16 |
| Synthesis of 1-butylpyrrolidine                                  | Fig. S17 |
| Synthesis of piperdine                                           | Fig. S18 |
| Synthesis of 2-methylpiperdine                                   | Fig. S19 |
| Synthesis of 1-pentylpiperdine                                   | Fig. S20 |
| Synthesis of 2-ethylpiperdine                                    | Fig. S21 |
| Synthesis of N-(phenylmethylene)-1-butylamine                    | Fig. S22 |
| Synthesis of N-(phenylmethylene)-1-hexylamine                    | Fig. S23 |

|                                                                                                                                          |          |
|------------------------------------------------------------------------------------------------------------------------------------------|----------|
| Synthesis of N-(phenylmethylene)-1-heptylamine                                                                                           | Fig. S24 |
| Synthesis of N-(phenylmethylene)-1-octylamine                                                                                            | Fig. S25 |
| Synthesis of N-(phenylmethylene)-1-nonylamine                                                                                            | Fig. S26 |
| Synthesis of N-(phenylmethylene)-1-decylamine                                                                                            | Fig. S27 |
| Synthesis of $\alpha$ -methyl-N-(phenylmethylene)benzenemethanamine                                                                      | Fig. S28 |
| Synthesis of N-(phenylmethylene)benzenamine                                                                                              | Fig. S29 |
| Synthesis of N-(phenylmethylene)benzenemethanamine                                                                                       | Fig. S30 |
| Synthesis of 3-amino-N-propylbenzenemethanamine                                                                                          | Fig. S31 |
| Synthesis of 3-nitro-N-propylbenzenemethanamine                                                                                          | Fig. S32 |
| Synthesis of 3-methoxy-N-propylbenzenemethanamine                                                                                        | Fig. S33 |
| Synthesis of N-hexyl-4-methyl-benzenemethanamine                                                                                         | Fig. S34 |
| Synthesis of N-hexyl- $\alpha$ -methylbenzenemethanamine                                                                                 | Fig. S35 |
| Synthesis of N-hexyl-(1-vinylcyclohexyl)amine                                                                                            | Fig. S36 |
| Synthesis of N-hexylcyclohexanamine                                                                                                      | Fig. S37 |
| Synthesis of N-(4-methylbenzyl)-3-phenylpropan-1-amine                                                                                   | Fig. S38 |
| Synthesis of N-(4-(tert-butyl)benzyl)-3-phenylpropan-1-amine                                                                             | Fig. S39 |
| Synthesis of N-phenylbenzenemethanamine-d                                                                                                | Fig. S40 |
| Synthesis of N-propylbenzenemethanamine-d                                                                                                | Fig. S41 |
| Synthesis of N-hexylbenzenemethanamine-d                                                                                                 | Fig. S42 |
| Synthesis of dibenzylamine-d                                                                                                             | Fig. S43 |
| Synthesis of cyclizine                                                                                                                   | Fig. S44 |
| Effect of concentrations of LiHMDS, toluene, catalyst <b>1</b> and benzylamine concentrations on the rate of dibenzylamine product yield | Fig. S45 |
| Formation of product at different concentration of reactants and other parameters                                                        | Fig. S46 |
| Plot of product concentration vs time using toluene and toluene-d <sub>8</sub> reactant                                                  | Fig. S47 |
| <sup>1</sup> H NMR of nickel (II) complex ( <b>1</b> ).                                                                                  | Fig. S48 |
| ESI of nickel (II) complex ( <b>1</b> )                                                                                                  | Fig. S49 |

|                                           |          |
|-------------------------------------------|----------|
| GC calibration curve                      | Fig. S50 |
| $^1\text{H}$ NMR of dibenzylamine (3j)    | Fig. S52 |
| $^{13}\text{C}$ NMR of dibenzylamine (3j) | Fig. S53 |
| Thermodynamic parameter calculation       | Table S2 |

## Supplementary Tables and Figures:

**Table S1** The reaction of toluene with benzylamine using various solvents and bases catalyzed by **1**.<sup>a</sup>

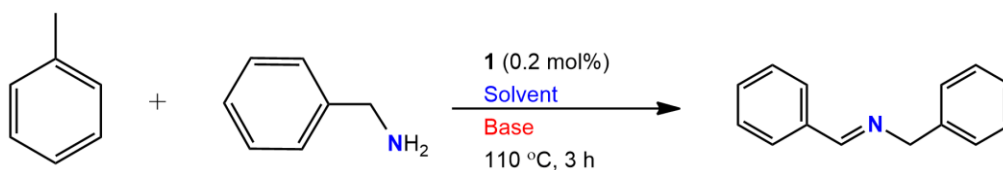

| Entry | Solvent             | Base               | TON  | % GC Yield | Entry | Solvent | Base/oxidant                    | TON  | % GC Yield |
|-------|---------------------|--------------------|------|------------|-------|---------|---------------------------------|------|------------|
| 1     | DMSO                | KO <sup>t</sup> Bu | 46.0 | 9.2        | 11    | DMSO    | KOH                             | 2.5  | 0.5        |
| 2     | Toluene             | KO <sup>t</sup> Bu | 10.5 | 2.1        | 12    | DMSO    | Cs <sub>2</sub> CO <sub>3</sub> | 18.8 | 3.8        |
| 3     | MTBE                | KO <sup>t</sup> Bu | NR   | 0.0        | 13    | DMSO    | DBU                             | 8.6  | 1.7        |
| 4     | <i>iso</i> -butanol | KO <sup>t</sup> Bu | NR   | 0.0        | 14    | DMSO    | <sup>b</sup> DMAP               | 17.4 | 3.5        |
| 5     | Propylene carbonate | KO <sup>t</sup> Bu | 6.1  | 1.2        | 15    | DMSO    | DABCO                           | 18.7 | 3.7        |
| 6     | Trifluorotoluene    | KO <sup>t</sup> Bu | NR   | 0.0        | 16    | DMSO    | KO <sup>t</sup> Bu              | 46.0 | 9.2        |
| 7     | DMA                 | KO <sup>t</sup> Bu | 12.2 | 2.4        | 17    | DMSO    | Pyridine oxide                  | 21.3 | 4.3        |
| 8     | DMF                 | KO <sup>t</sup> Bu | 10.0 | 2.0        | 18    | DMSO    | Iodobenzene diacetate           | 6.6  | 1.3        |
| 9     | Cyclohexane         | KO <sup>t</sup> Bu | NR   | NR         |       |         |                                 |      |            |
| 10    | Acetonitrile        | KO <sup>t</sup> Bu | NR   | NR         |       |         |                                 |      |            |

<sup>a</sup>TONs and GC yields represent an average of two runs. TON and percent GC yield were measured by gas chromatography/mass spectrometry (GC/MS) using decane as an internal standard. No reaction (NR). <sup>b</sup>4-Dimethylaminopyridine.

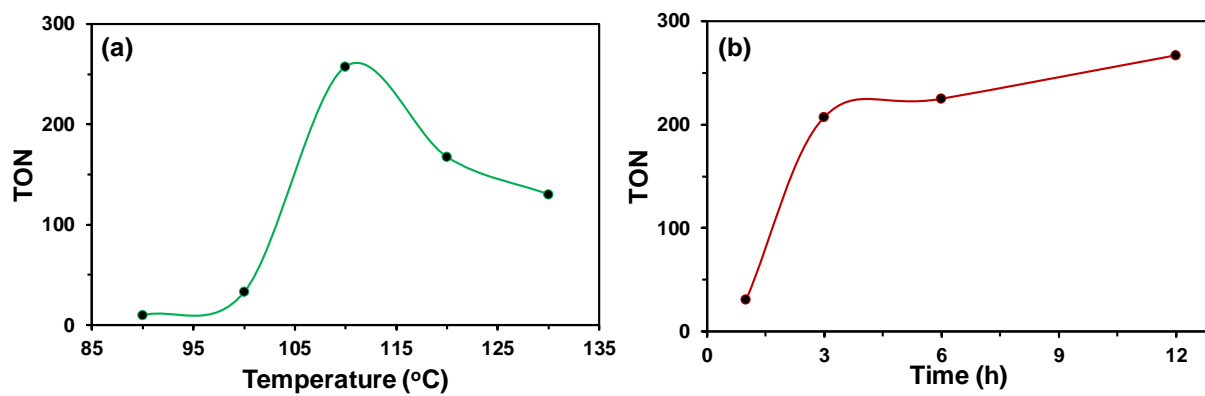

**Fig. S1** Study of the effect of a) temperature (for 3 h) and b) time (at 110 °C) on C-N coupling reaction. Reaction conditions: **1** (2.0 mg, 3.46  $\mu$ mol), benzylamine (183.5 mg, 1.71 mmol), toluene (157.8 mg, 1.71 mmol), KO<sup>t</sup>Bu (0.31 eq., 55.0 mg, 0.49 mmol) and DMSO (1.0 mL) were used.

*Synthesis of N-propylbenzenemethanamine:*

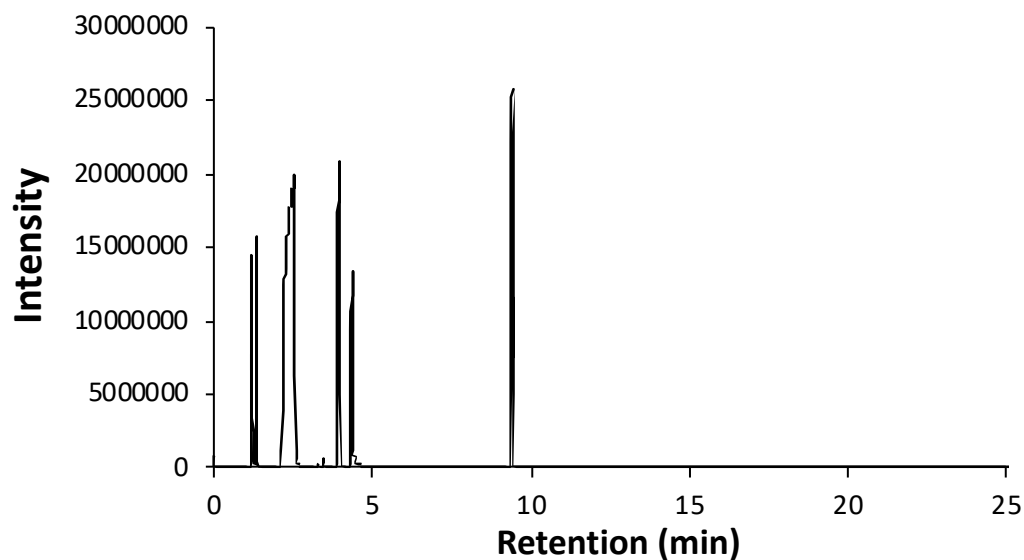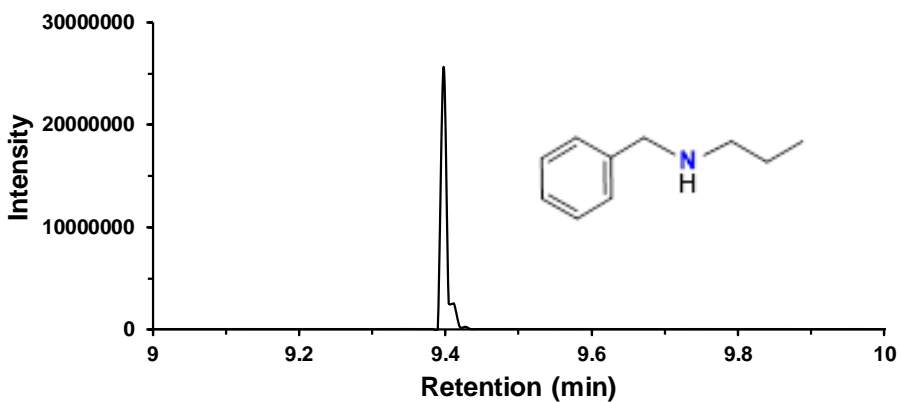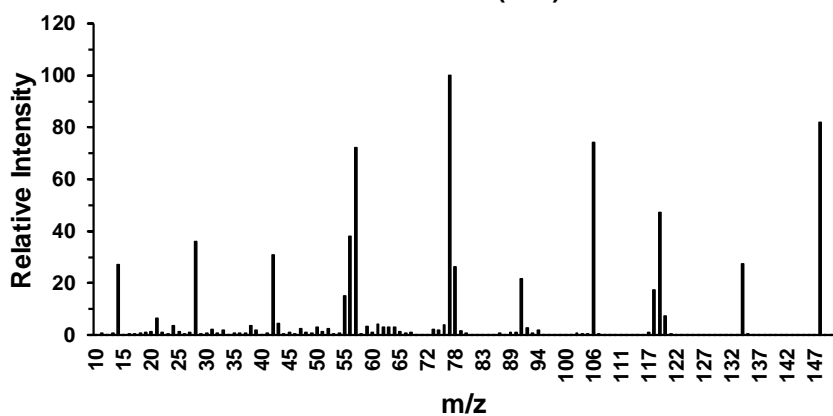

**Fig. S2** GC/MS of the reaction between propylamine and toluene. The sample was analyzed with decane as an internal standard.

*Synthesis of N-butylbenzenemethanamine:*

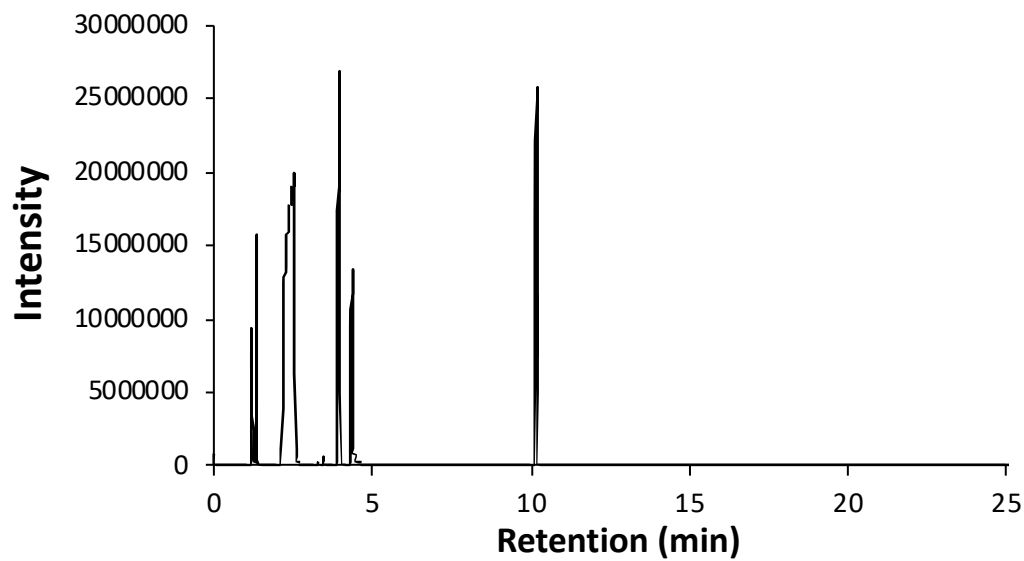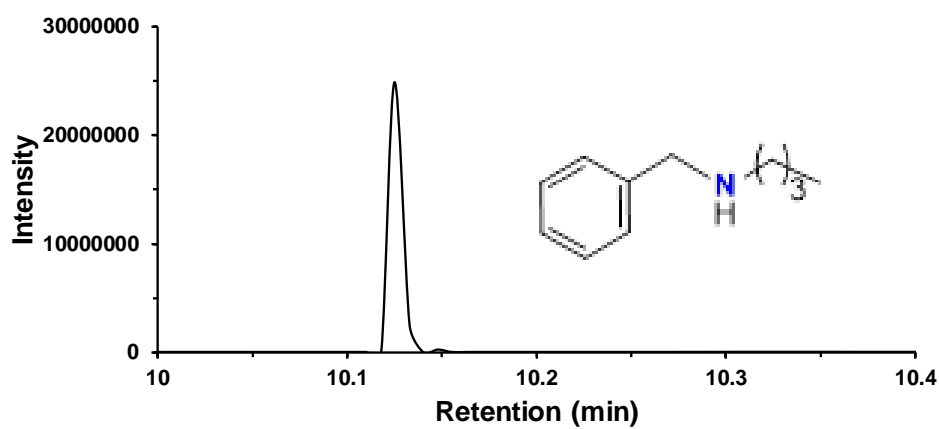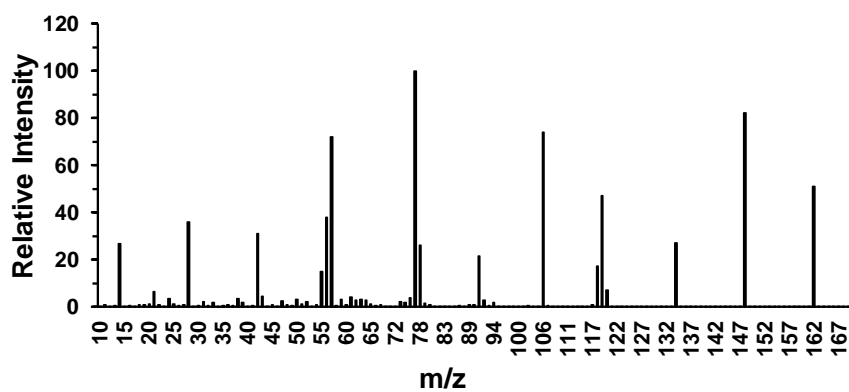

**Fig. S3** GC/MS of the reaction between butylamine and toluene. The sample was analyzed with decane as an internal standard.



*Synthesis of N-pentylbenzenemethanamine:*

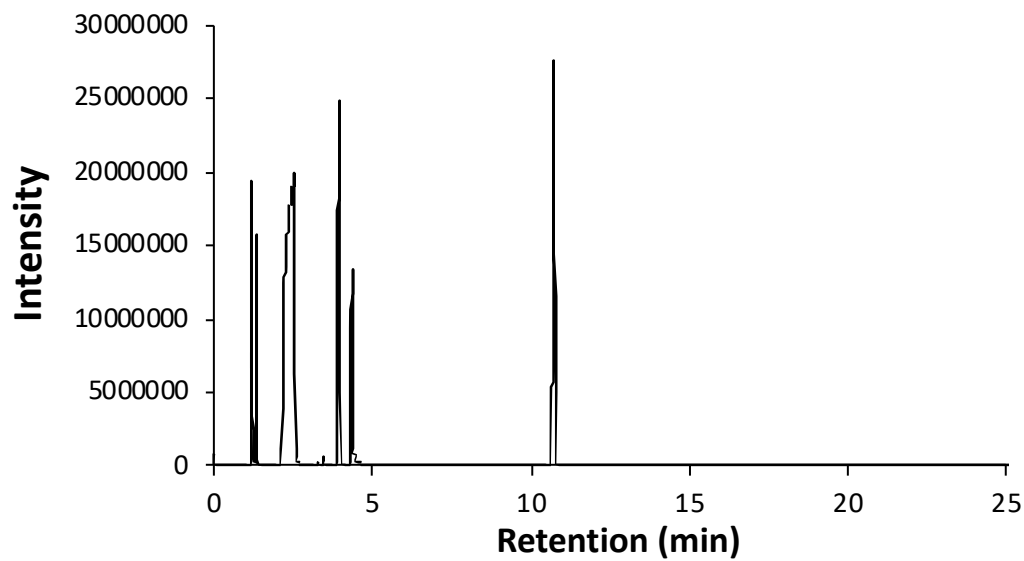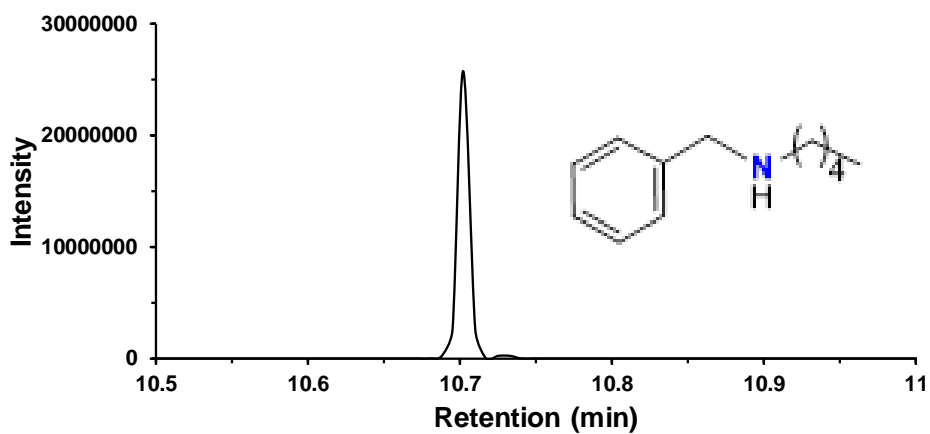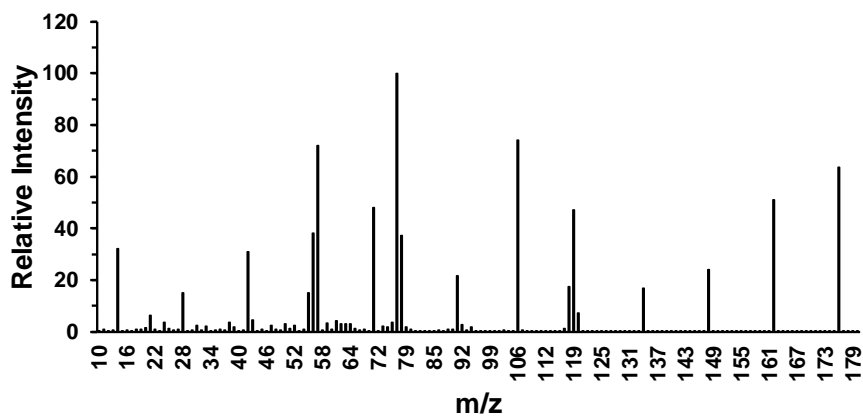

**Fig. S4** GC/MS of the reaction between pentylamine and toluene. The sample was analyzed with decane as the internal standard.

*Synthesis of N-hexylbenzenemethanamine:*

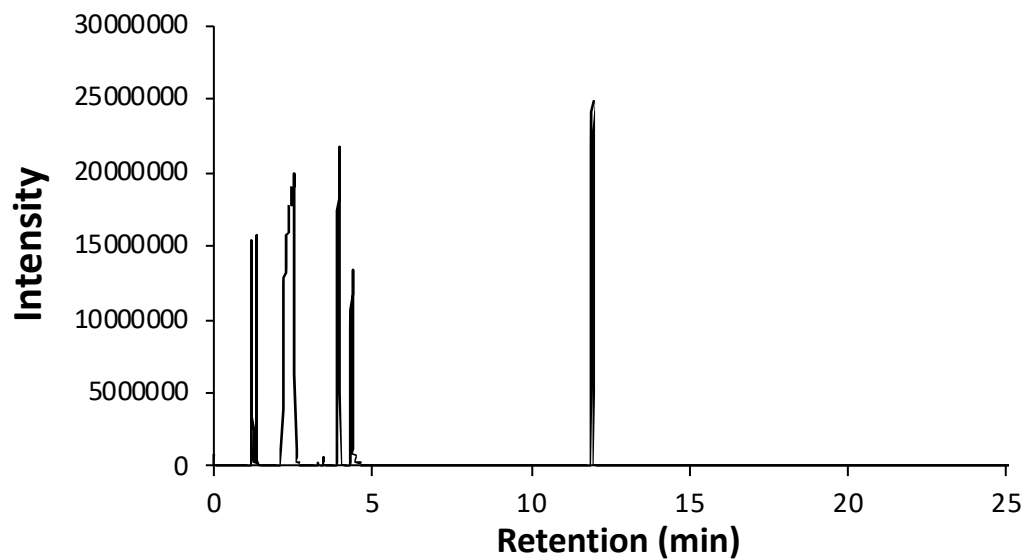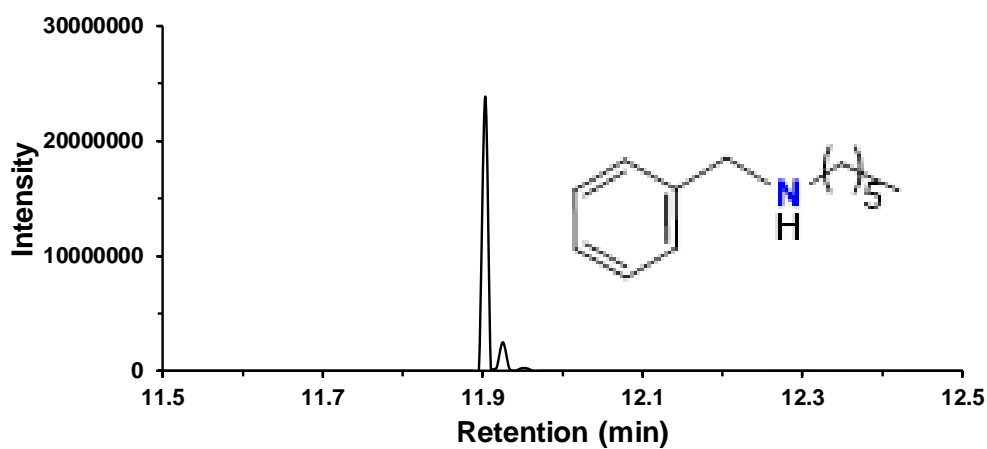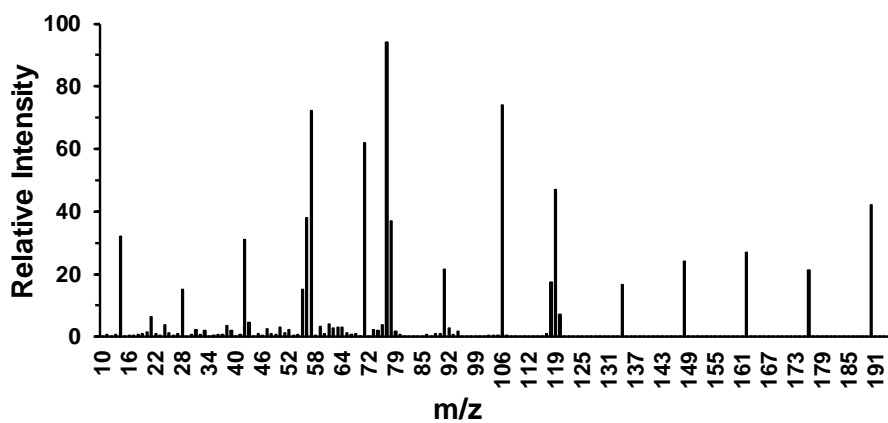

**Fig. S5** GC/MS of the reaction between hexylamine and toluene. The sample was analyzed with decane as an internal standard.

*Synthesis of N-heptylbenzenemethanamine:*

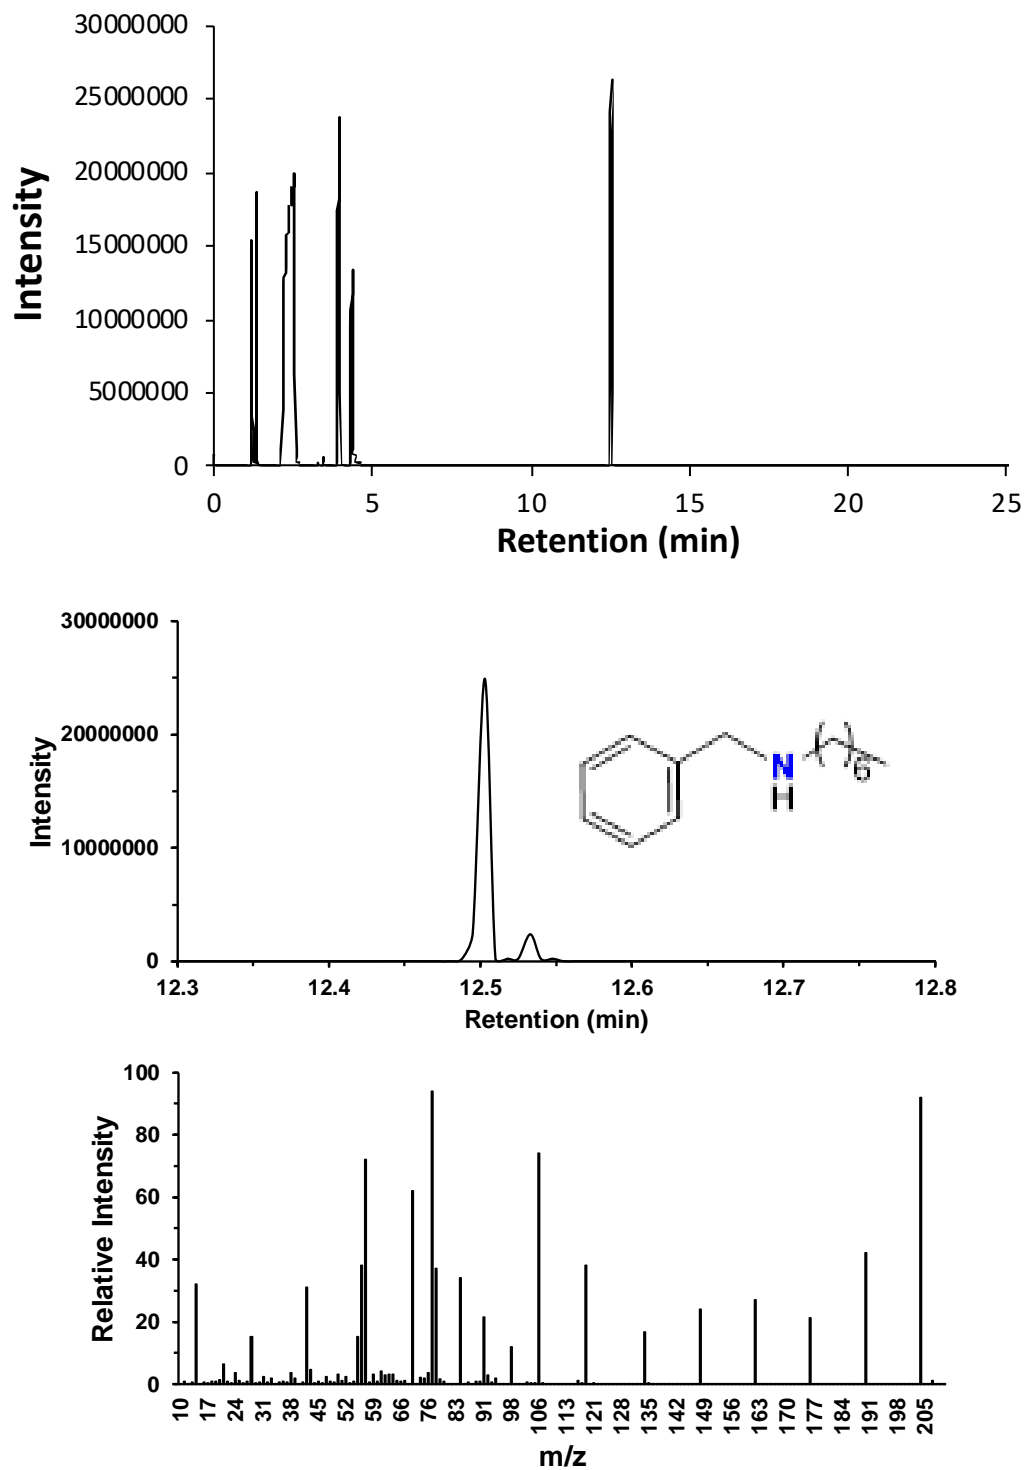

**Fig. S6** GC/MS of the reaction between heptylamine and toluene. The sample was analyzed with decane as an internal standard.

*Synthesis of N-octylbenzenemethanamine:*

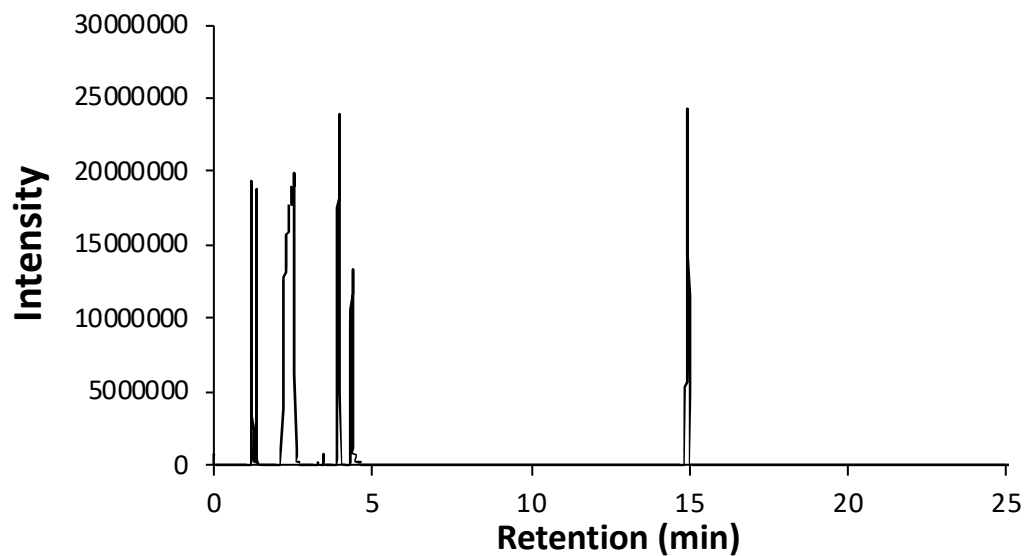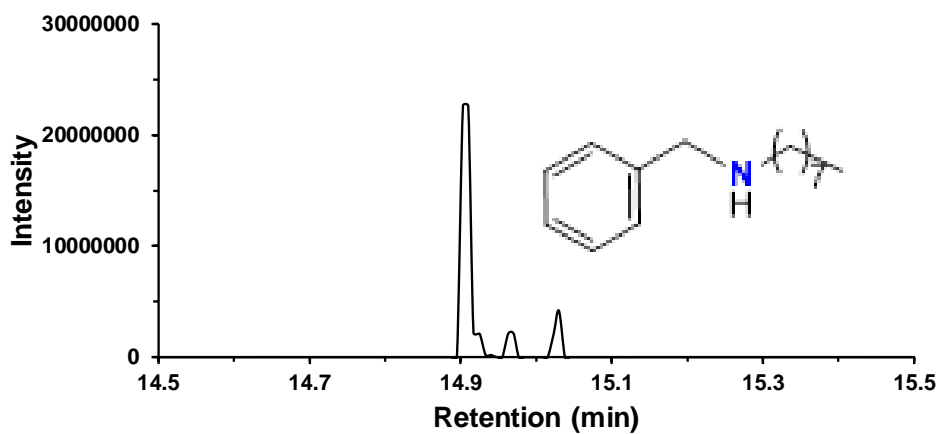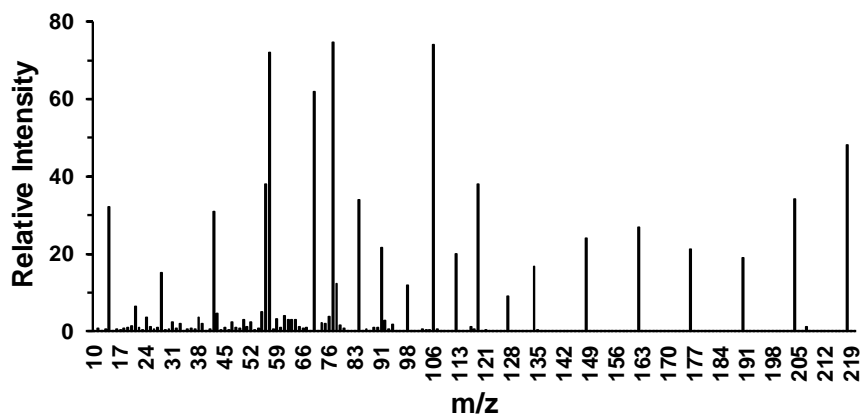

**Fig. S7** GC/MS of the reaction between octylamine and toluene. The sample was analyzed with decane as an internal standard.

*Synthesis of N-nonylbenzenemethanamine:*

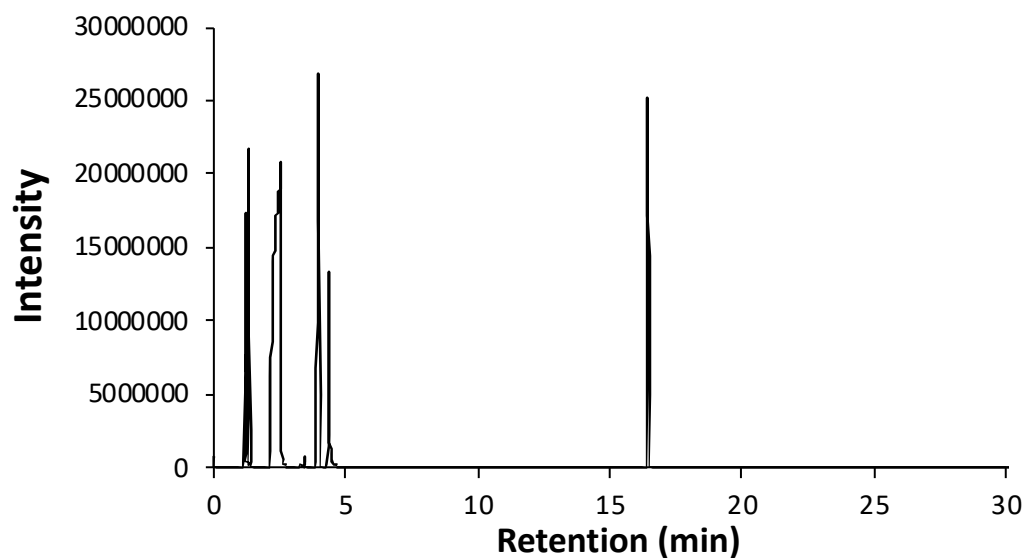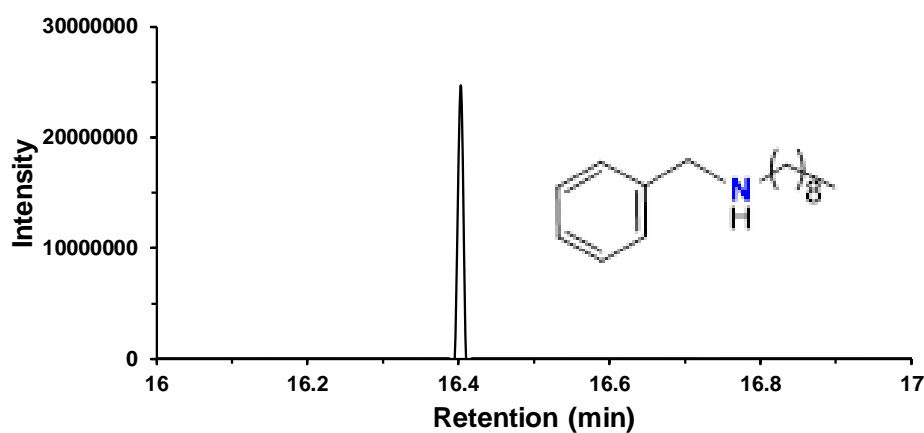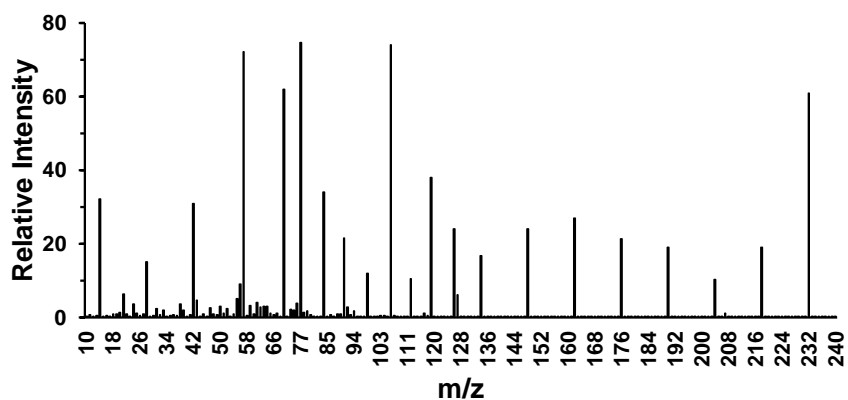

**Fig. S8** GC/MS of the reaction between nonylamine and toluene. The sample was analyzed with decane as an internal standard.

*Synthesis of N-decylbenzenemethanamine:*

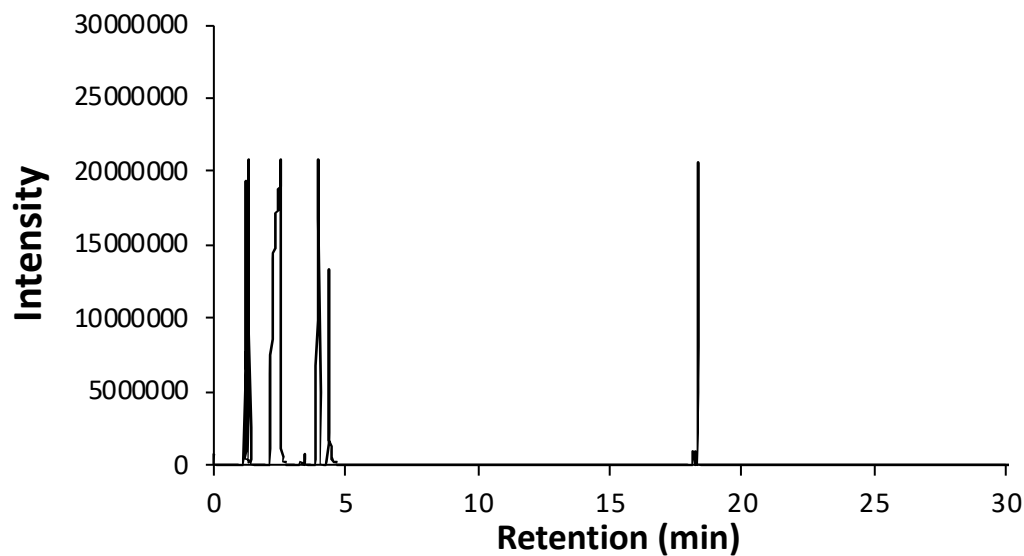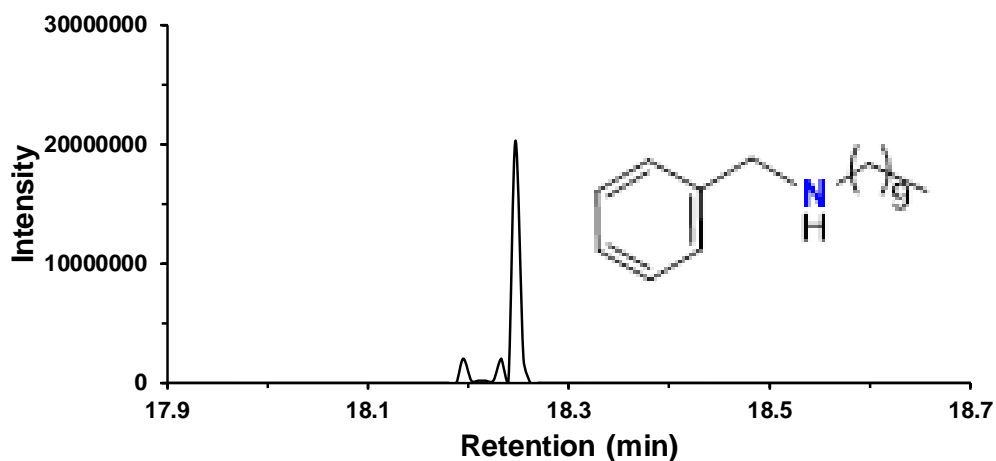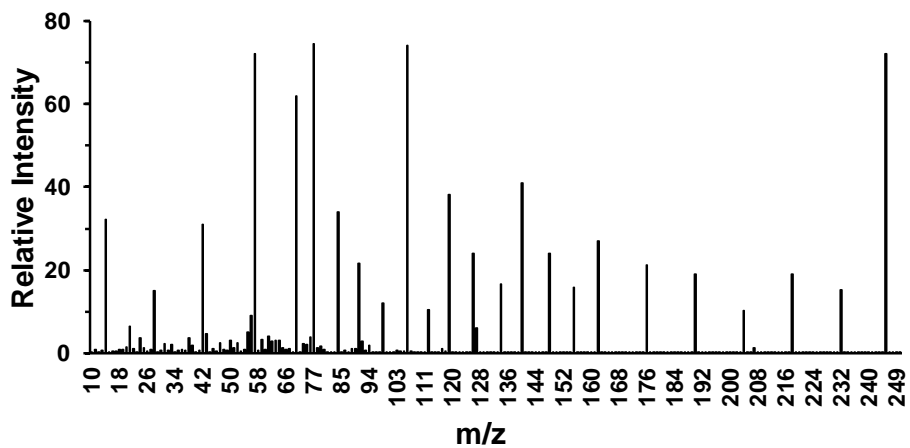

**Fig. S9** GC/MS of the reaction between decylamine and toluene. The sample was analyzed with decane as an internal standard.

*Synthesis of N-phenylbenzenemethanamine:*

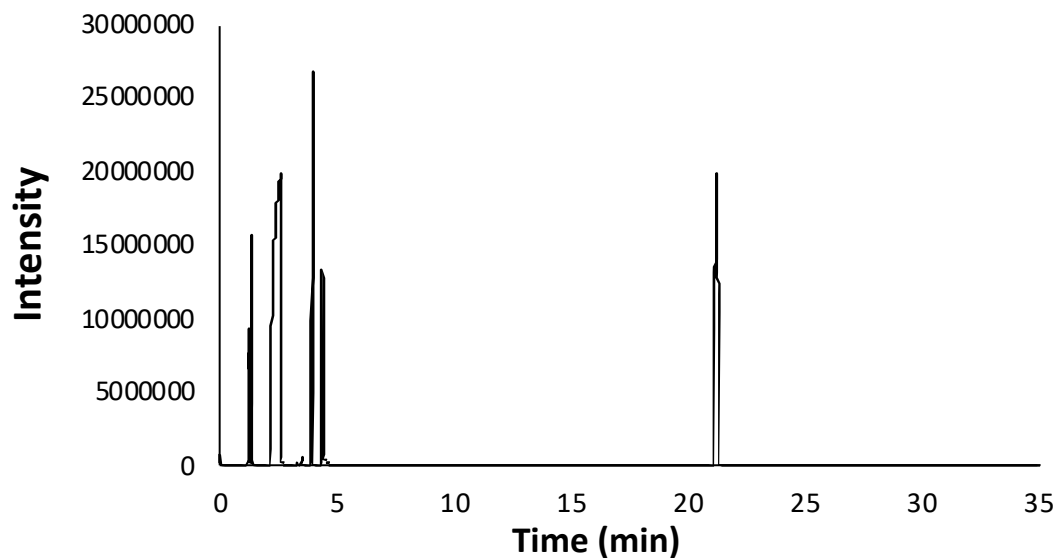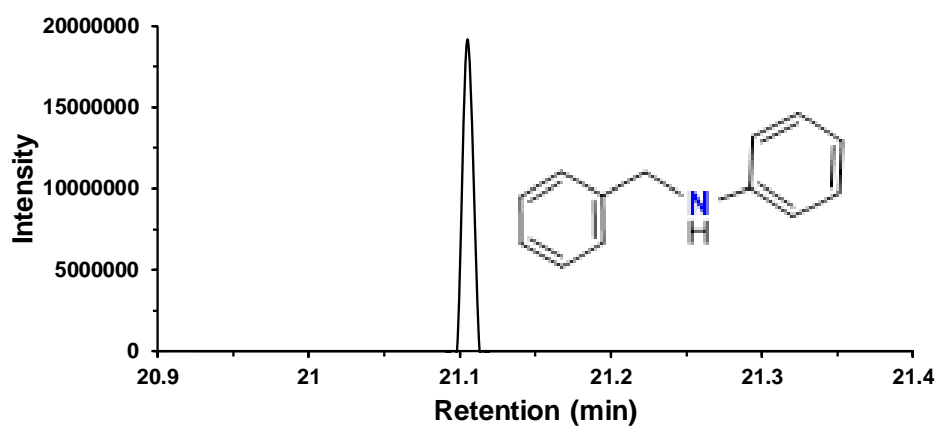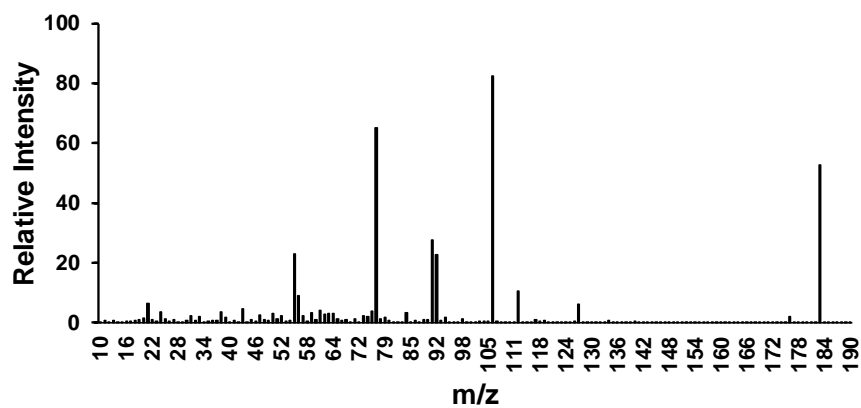

**Fig. S10** GC/MS of the reaction between aniline and toluene. The sample was analyzed with decane as an internal standard.

*Synthesis of dibenzylamine:*

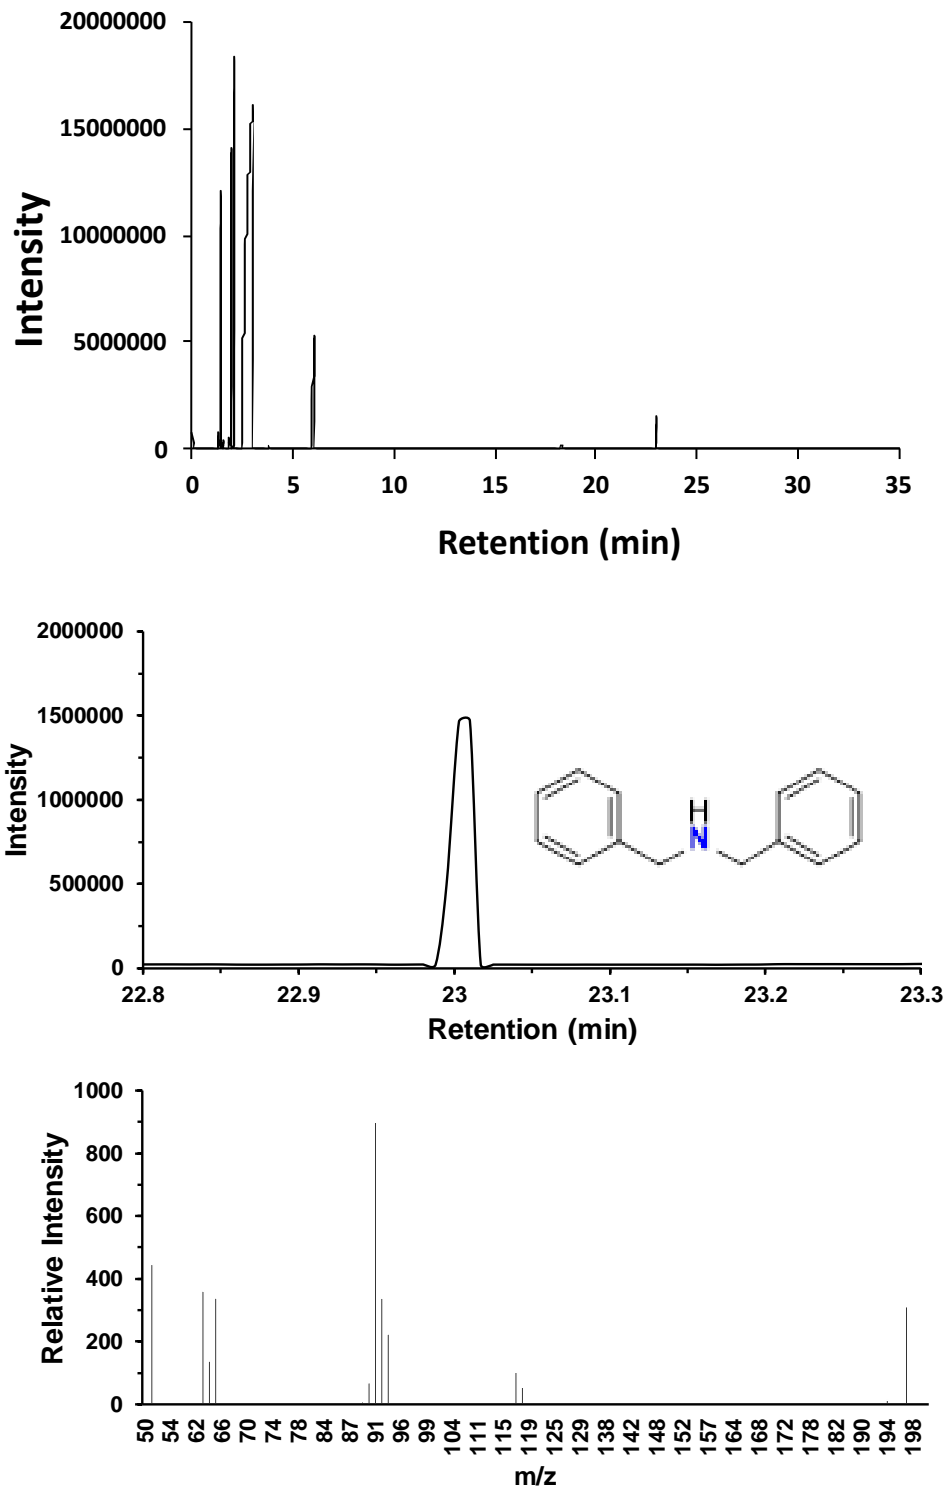

**Fig. S11** GC/MS of the reaction between benzylamine and toluene. The sample was analyzed with decane as an internal standard.



*Synthesis of  $\alpha$ -methyl-N-(phenylmethyl)benzenemethanamine:*

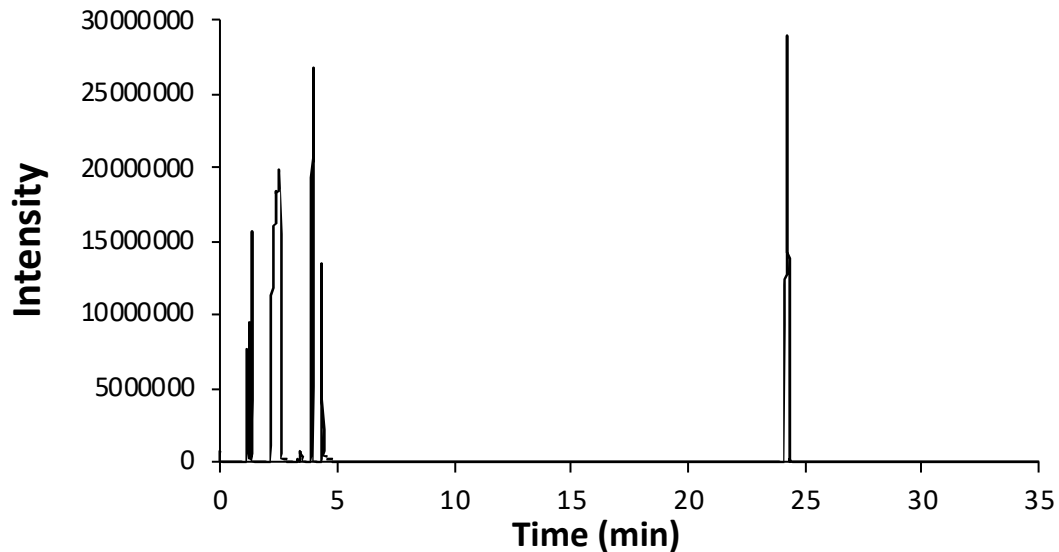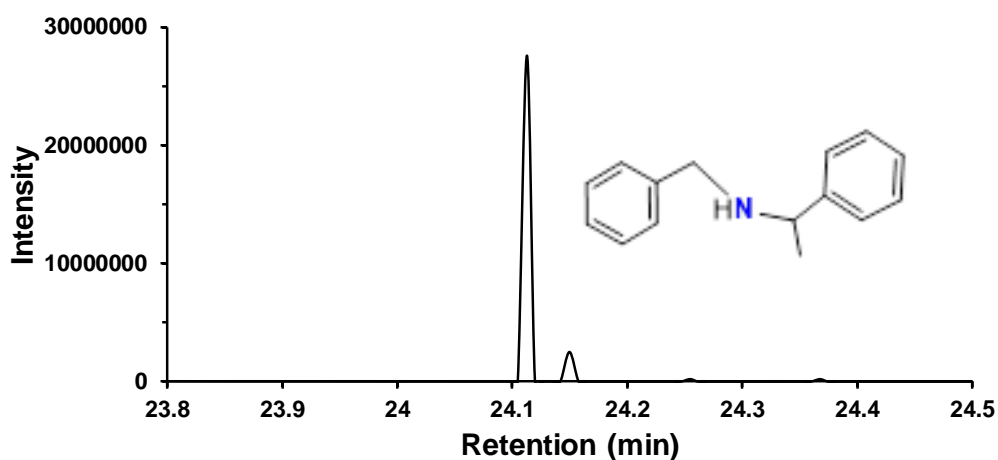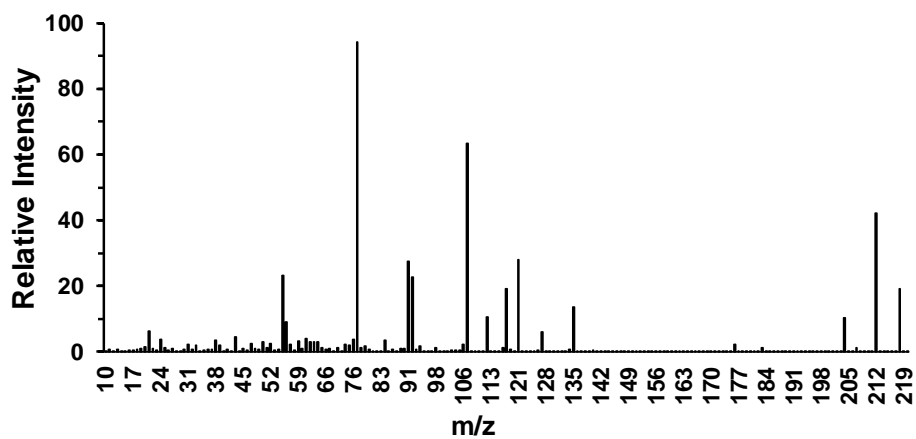

**Fig. S12** GC/MS of the reaction between  $\alpha$ -methylbenzylamine and toluene. The sample was analyzed with decane as an internal standard.

*Synthesis of N-(3-methylbutyl)benzenemethanamine:*

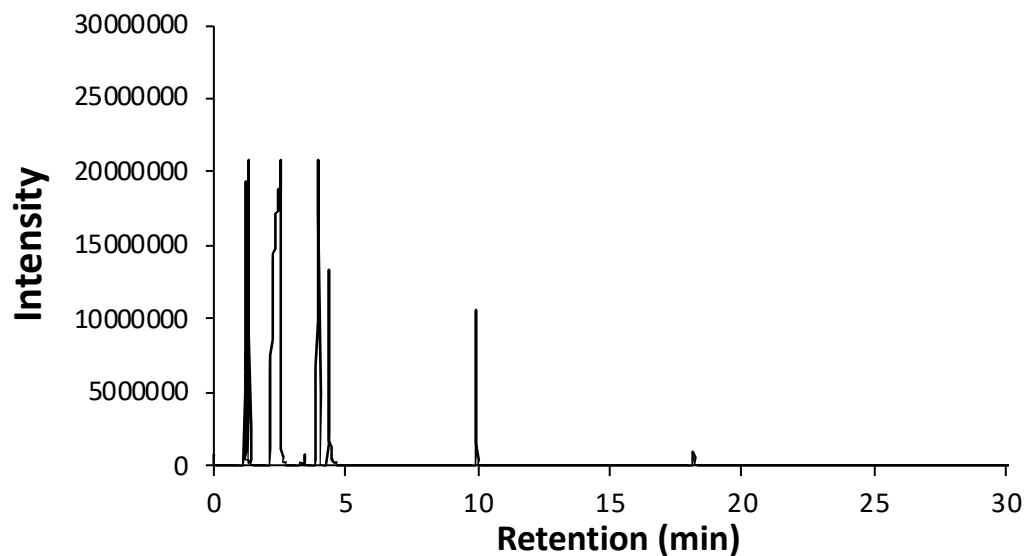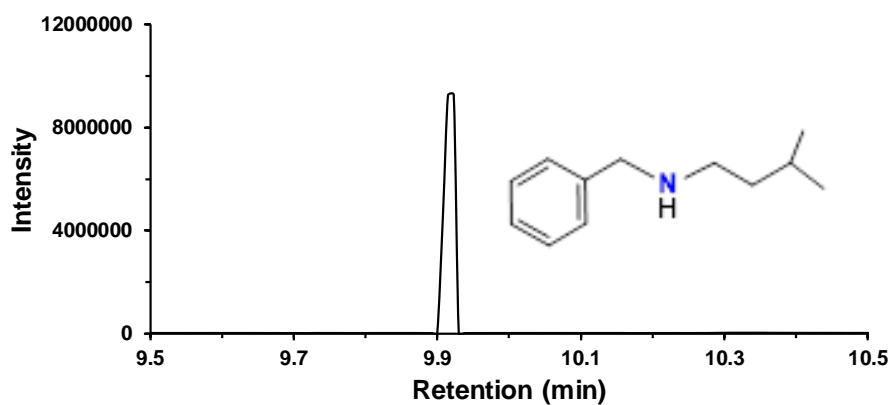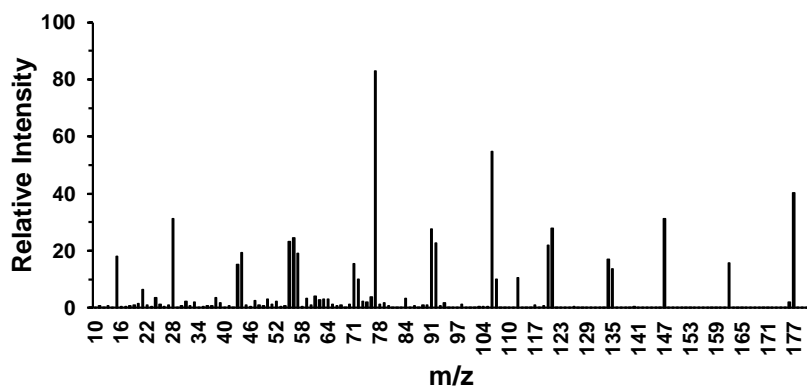

**Fig. S13** GC/MS of the reaction between isoamylamine and toluene. The sample was analyzed with decane as an internal standard.

*Synthesis of pyrrolidine:*

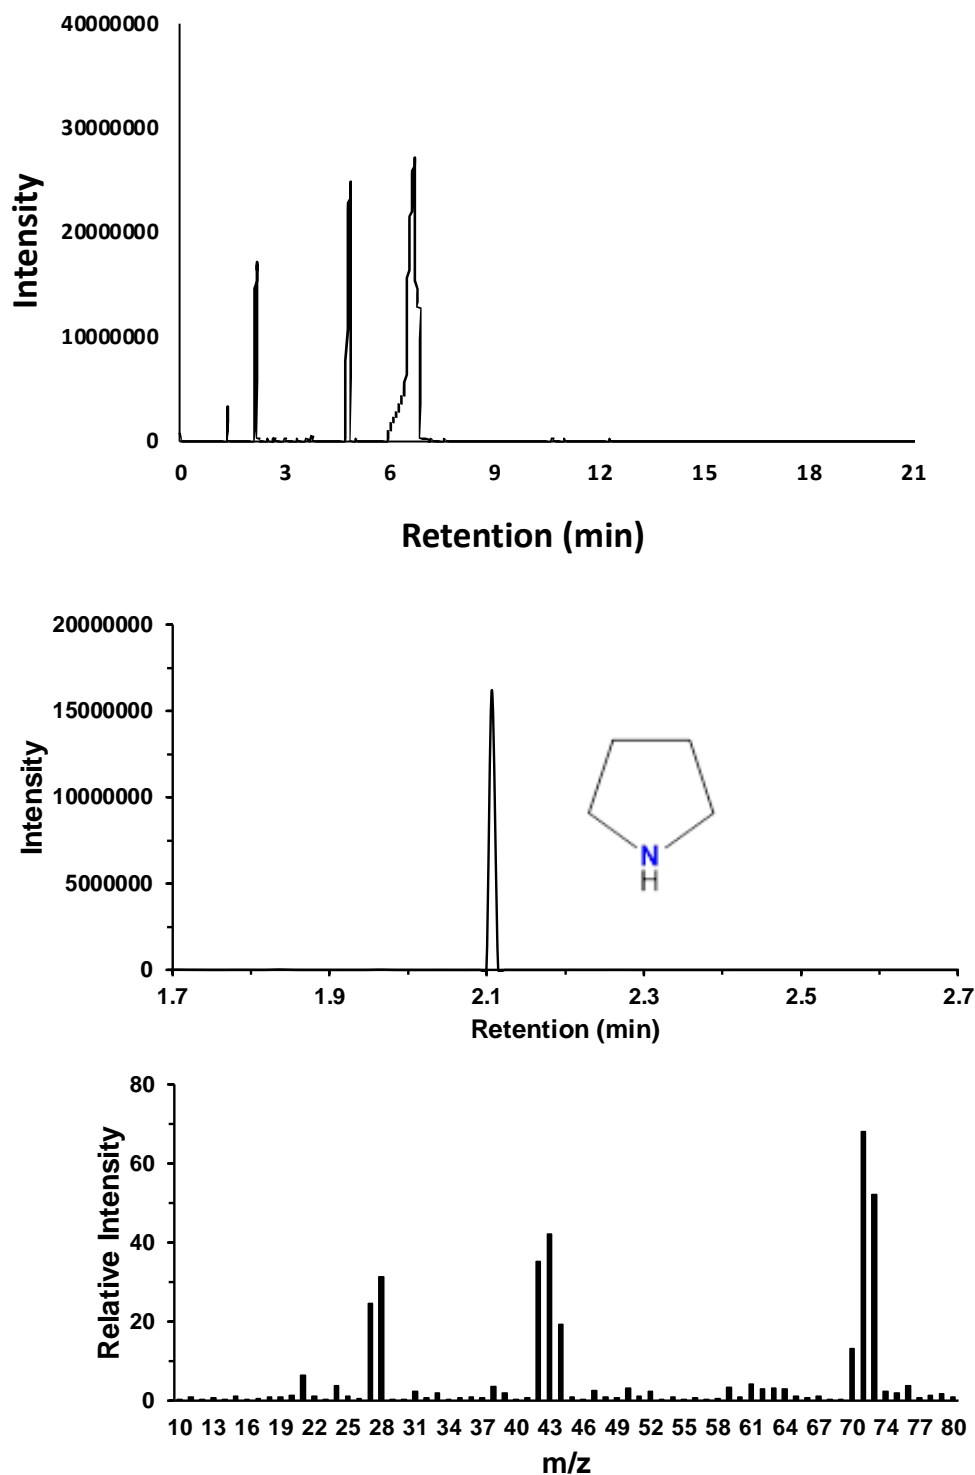

**Fig. S14** GC/MS of the cyclization of butylamine. The sample was analyzed with decane as an internal standard.

*Synthesis of 1-methylpyrrolidine:*

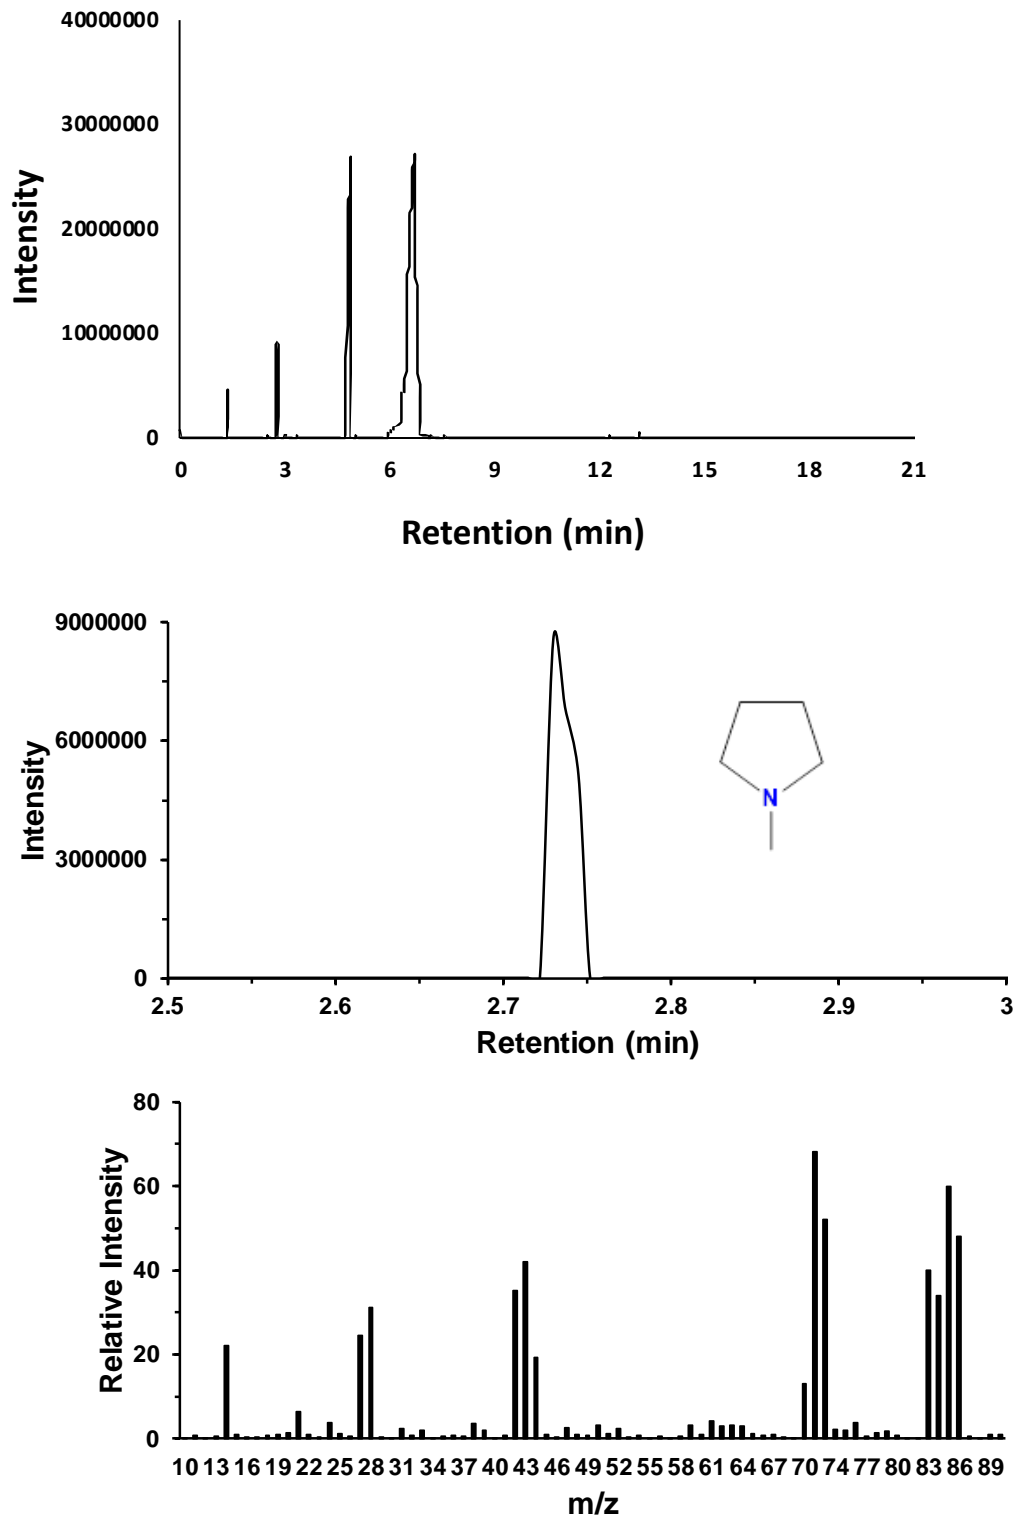

**Fig. S15** GC/MS of the cyclization of butylmethylamine. The sample was analyzed with decane as an internal standard.

*Synthesis of 1-ethylpyrrolidine:*

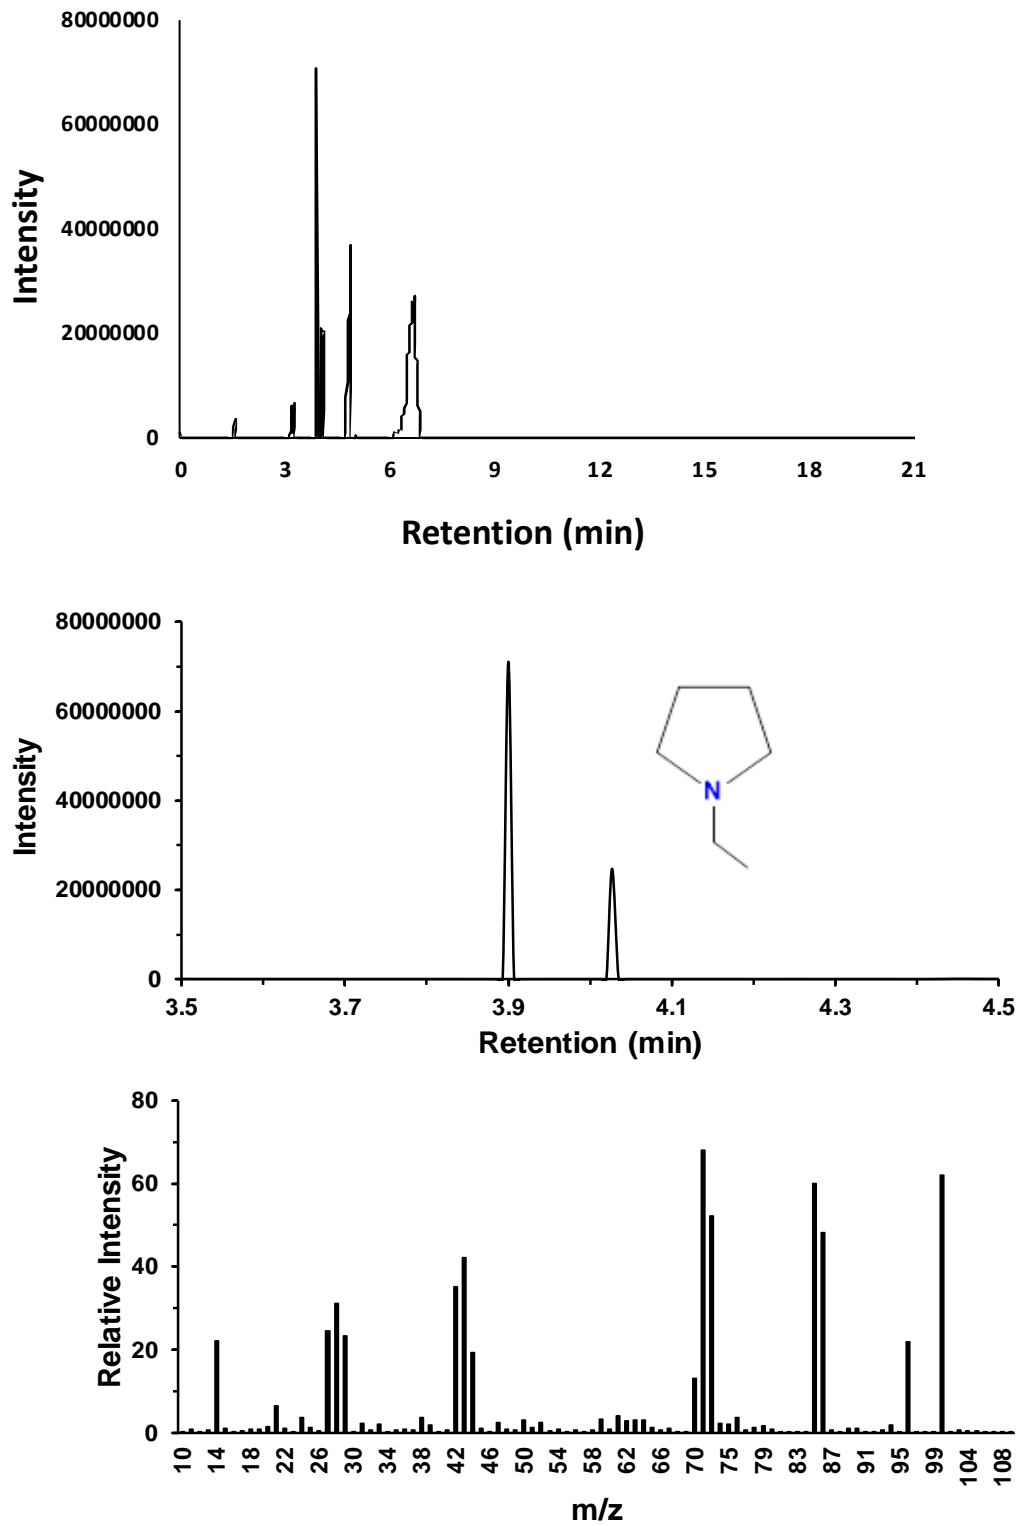

**Fig. S16** GC/MS of the cyclization of butylethylamine. The sample was analyzed with decane as an internal standard.

*Synthesis of 1-butylpyrrolidine:*

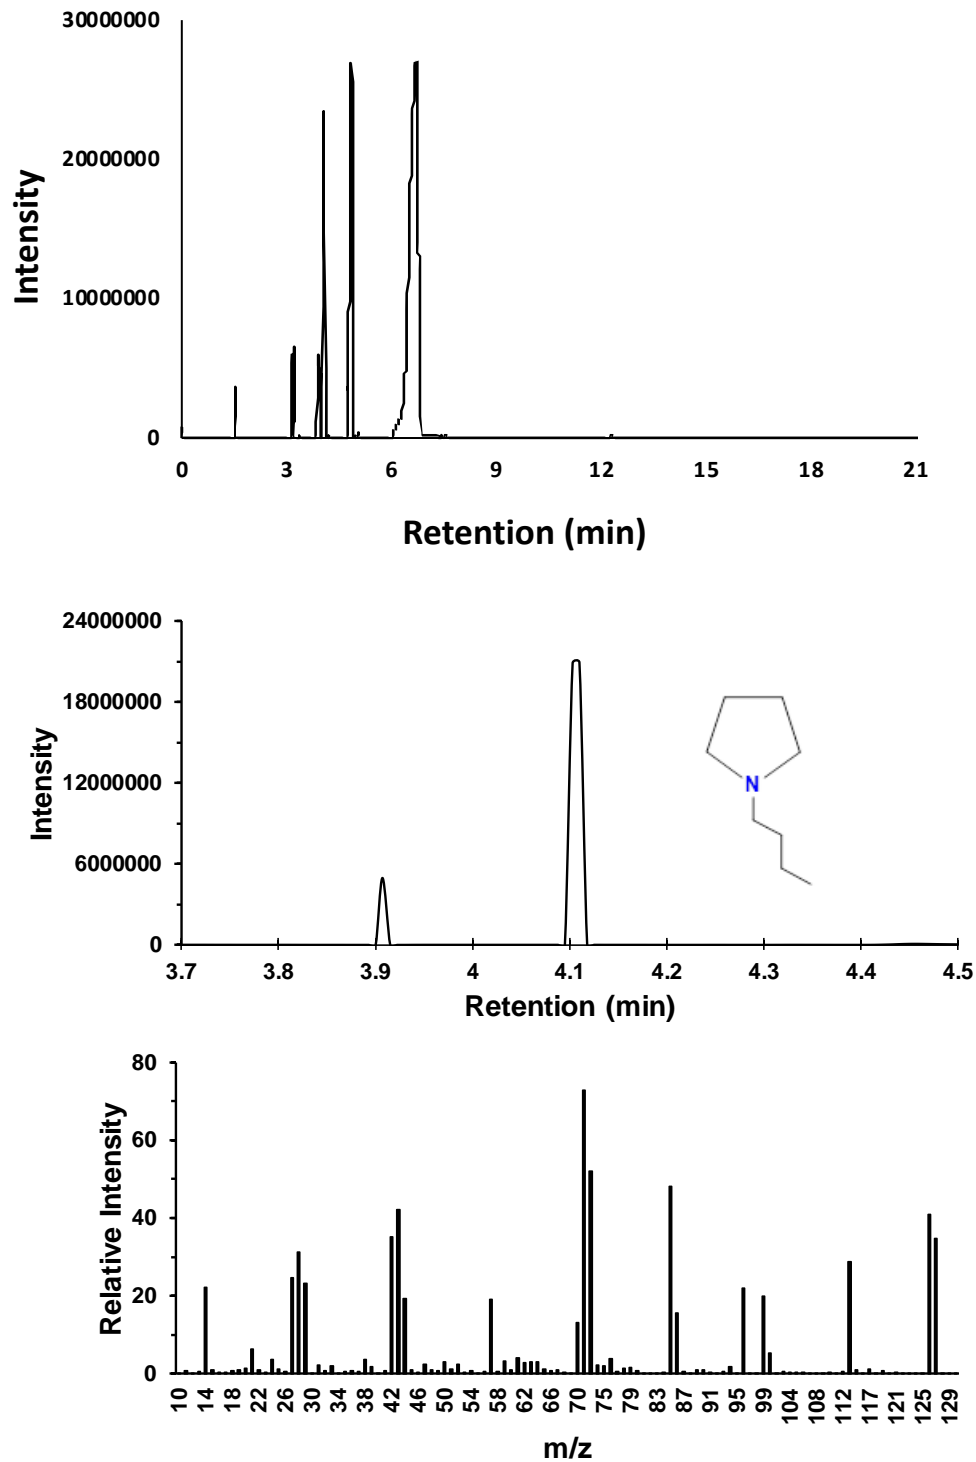

**Fig. S17** GC/MS of the cyclization of di-butylamine. The sample was analyzed with decane as an internal standard.

*Synthesis of piperidine:*

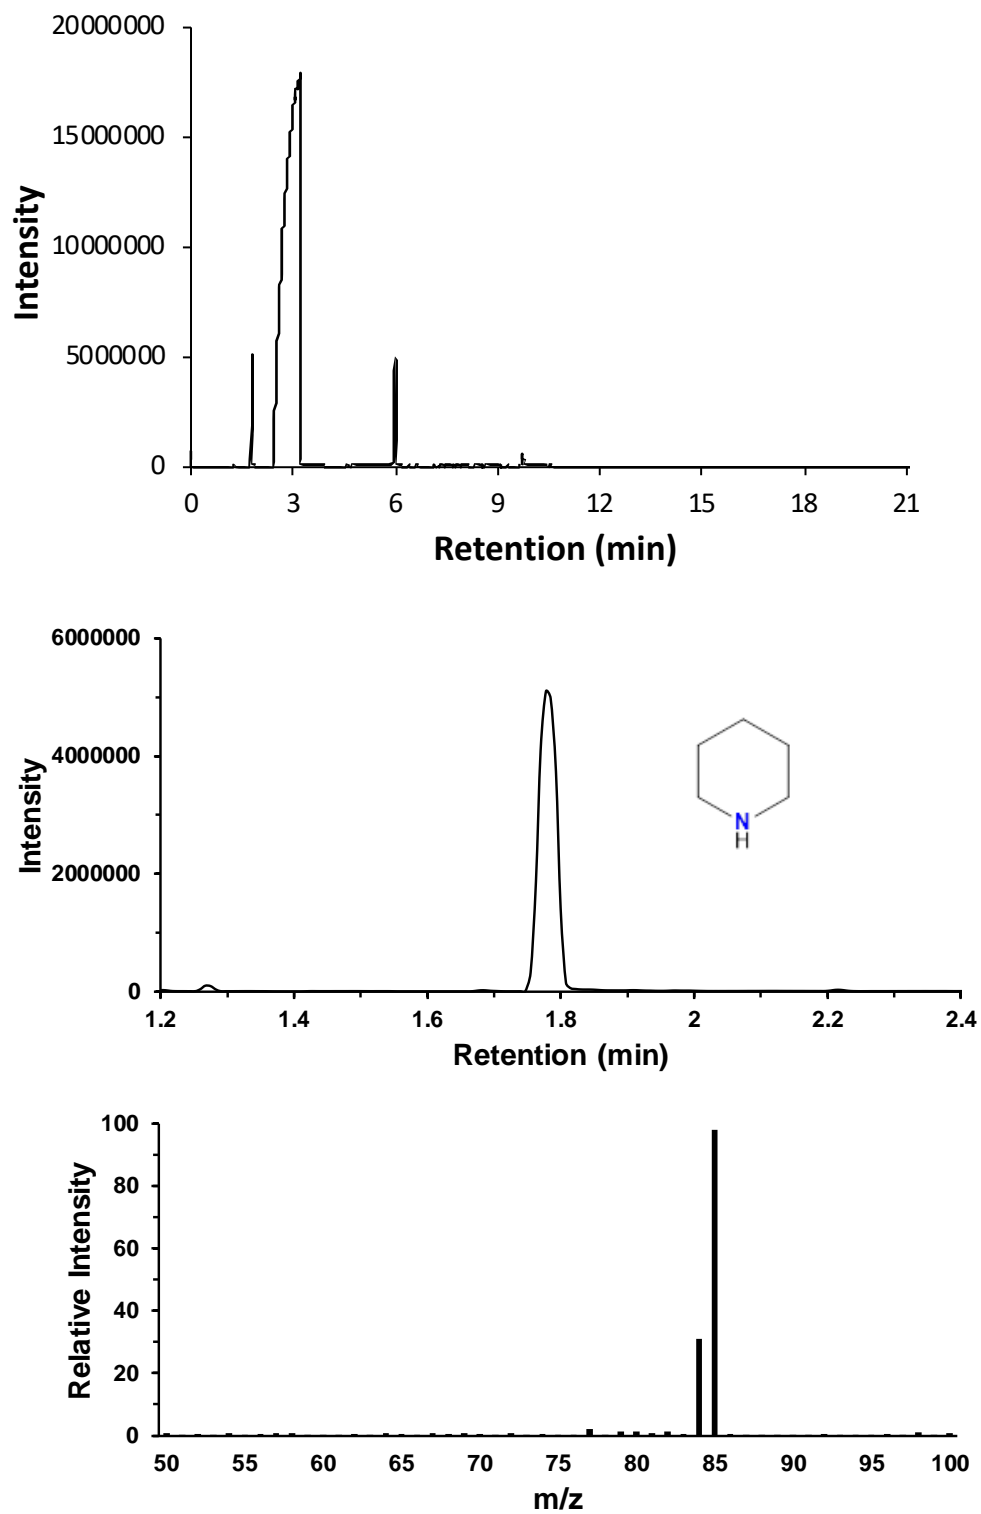

**Fig. S18** GC/MS of the cyclization of pentylamine. The sample was analyzed with decane as an internal standard.

*Synthesis of 2-methylpiperidine:*

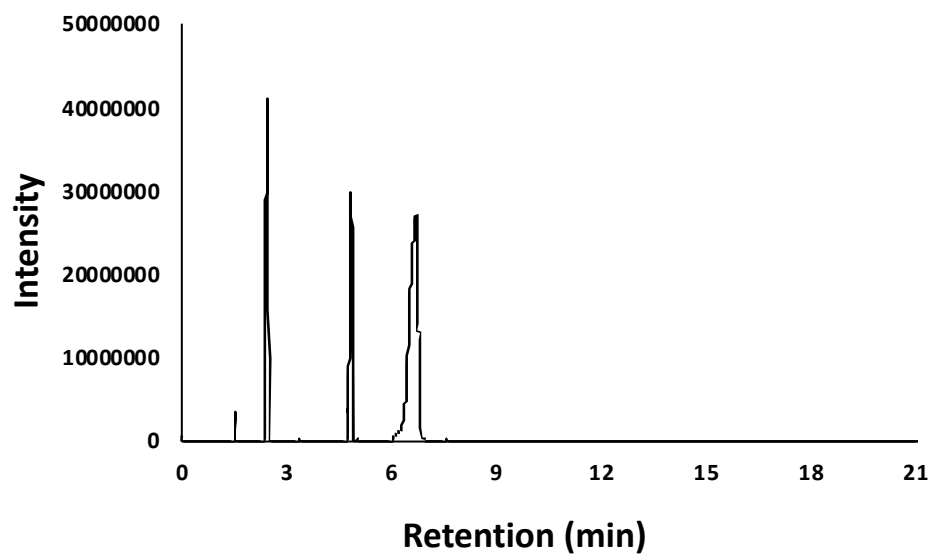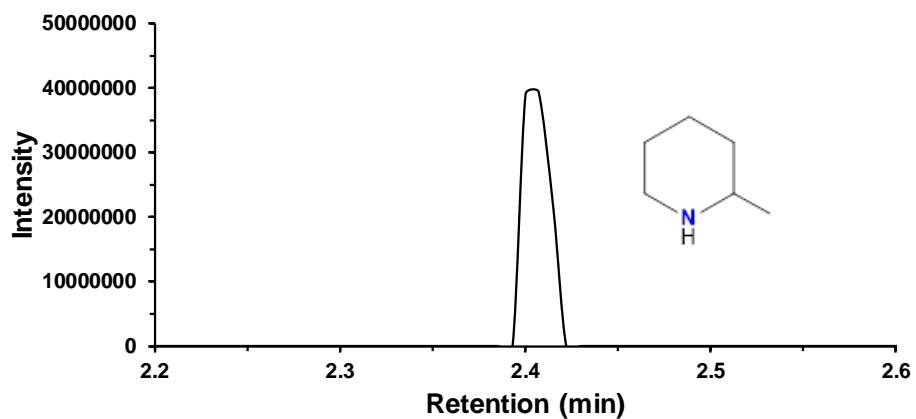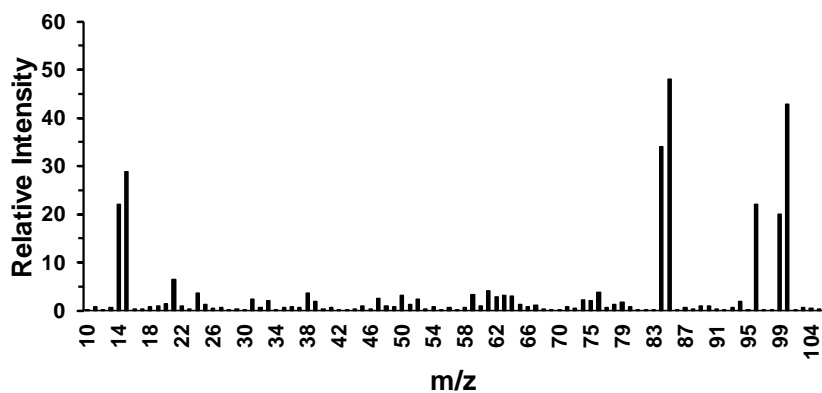

**Fig. S19** GC/MS of the cyclization of hexylamine. The sample was analyzed with decane as an internal standard.



*Synthesis of 1-pentylpiperidine:*

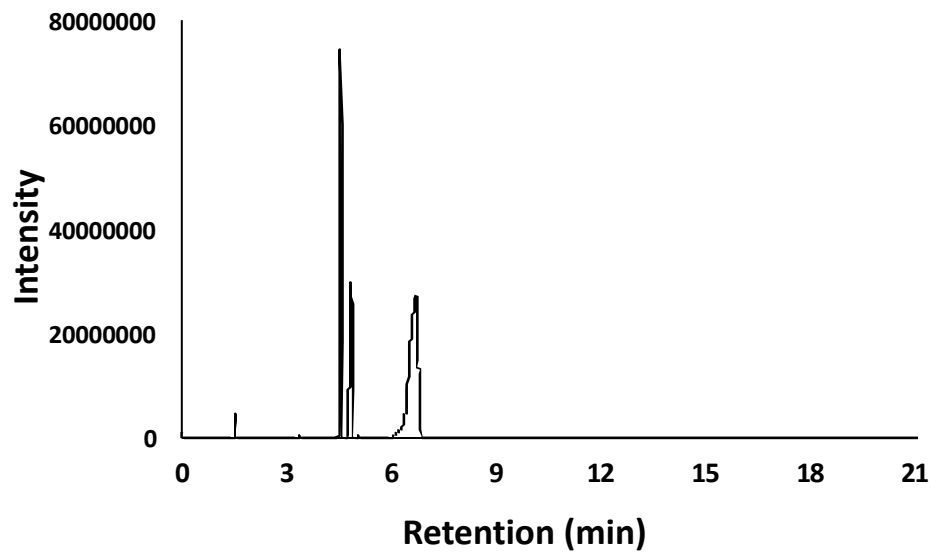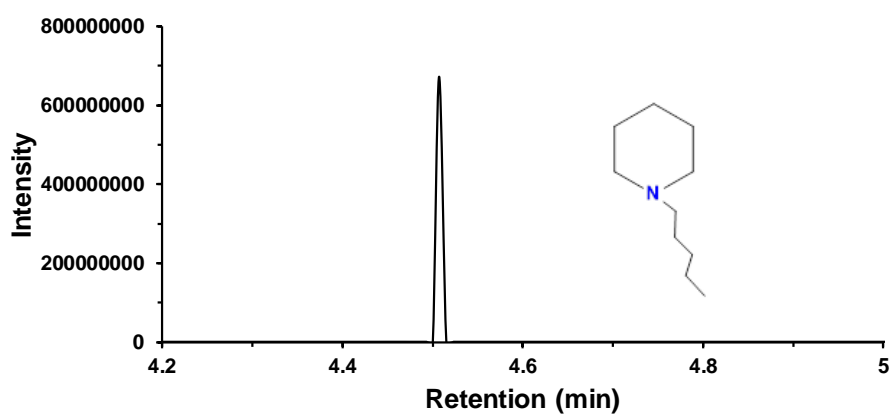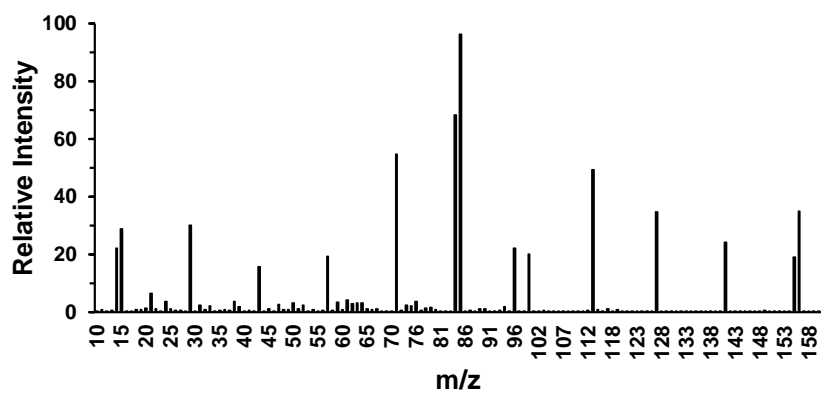

**Fig. S20** GC/MS of the cyclization of di-pentylamine. The sample was analyzed with decane as an internal standard.

*Synthesis of 2-ethylpiperidine:*

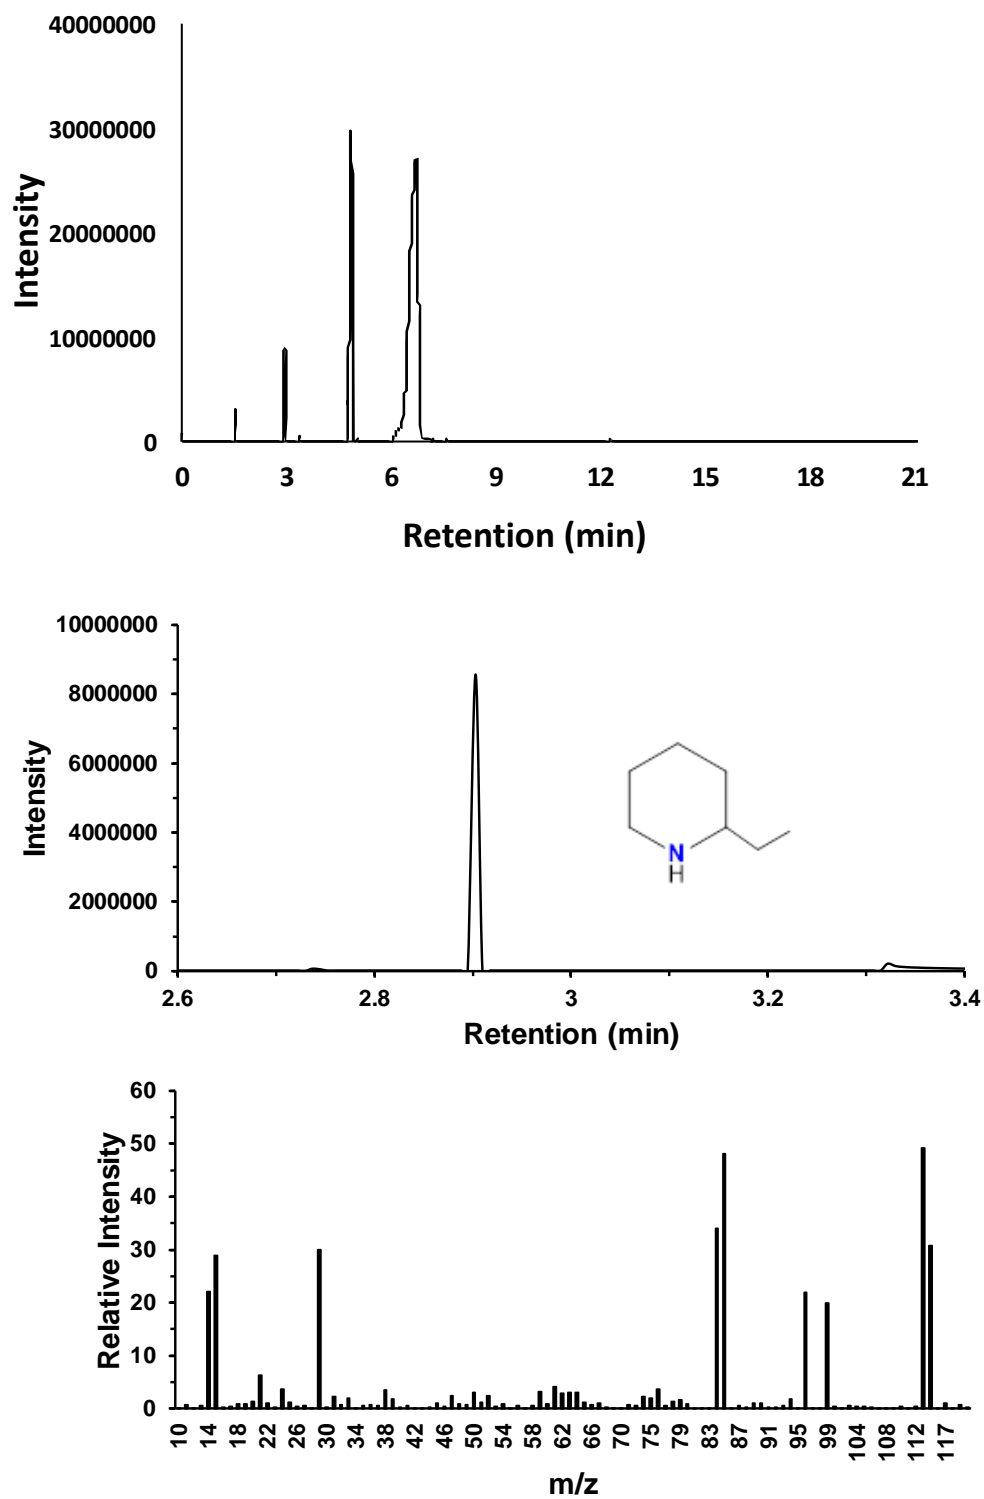

**Fig. S21** GC/MS of the cyclization of heptylamine. The sample was analyzed with decane as an internal standard.

*Synthesis of N-(phenylmethylene)-1-butylamine:*

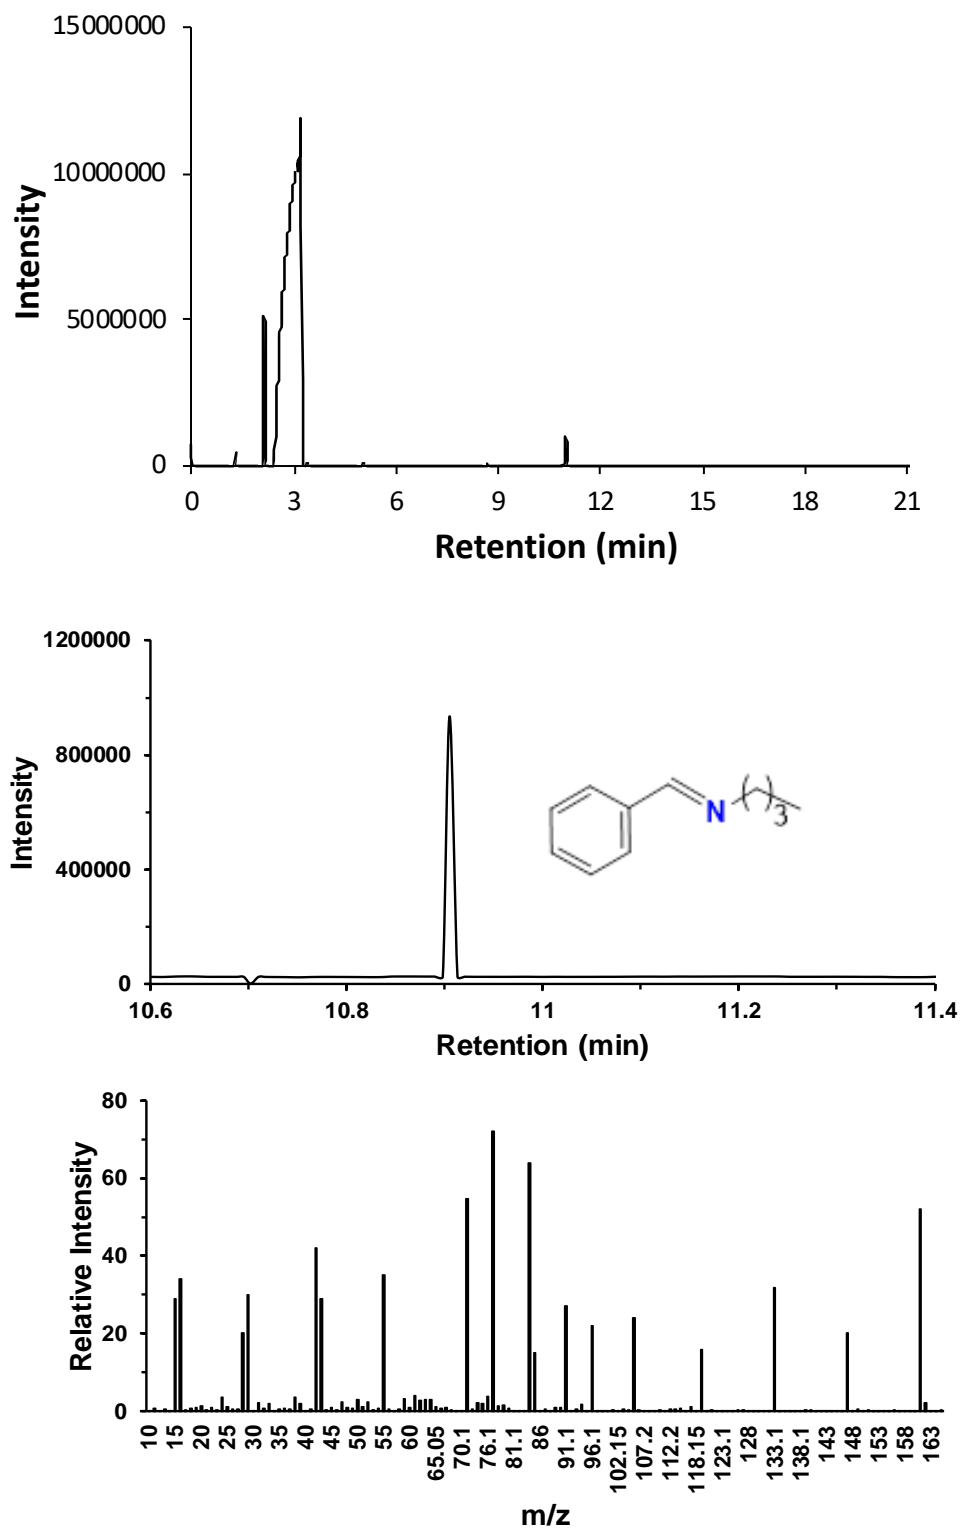

**Fig. S22** GC/MS of the reaction between butylamine and toluene. The sample was analyzed with decane as an internal standard.

*Synthesis of N-(phenylmethylene)-1-hexylamine:*

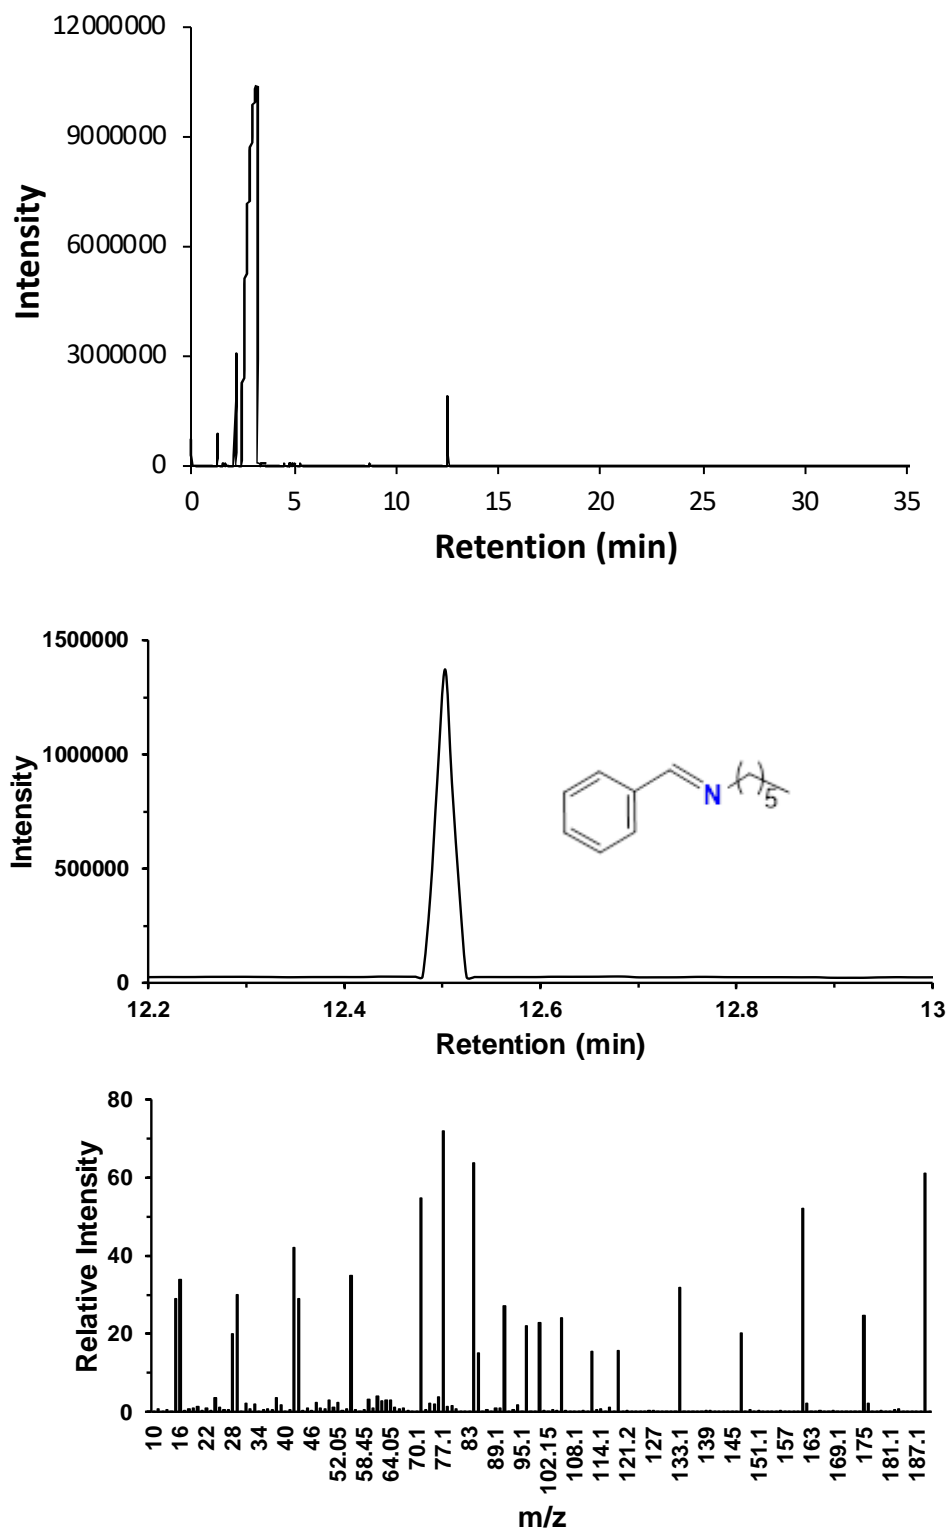

**Fig. S23** GC/MS of the reaction between hexylamine and toluene. The sample was analyzed with decane as an internal standard.

*Synthesis of N-(phenylmethylene)-1-heptylamine:*

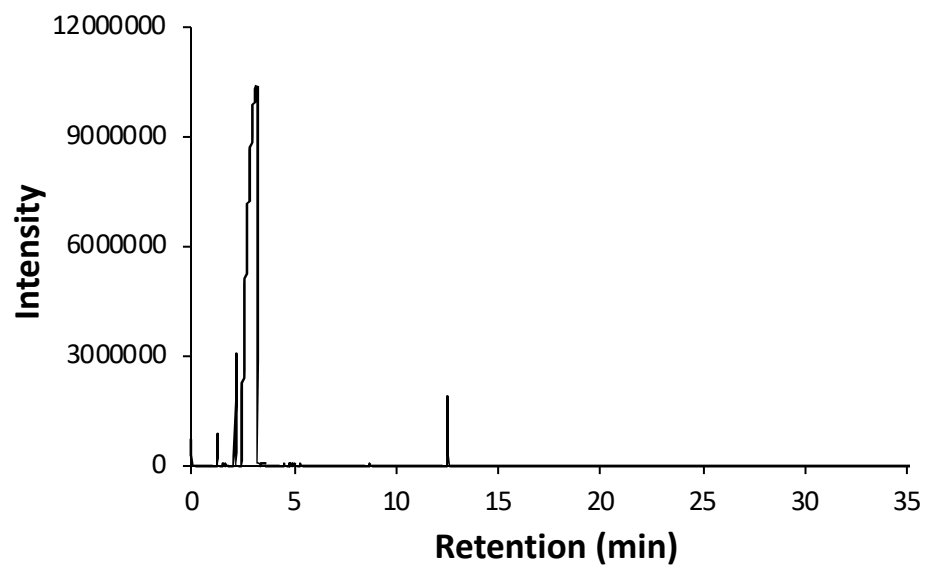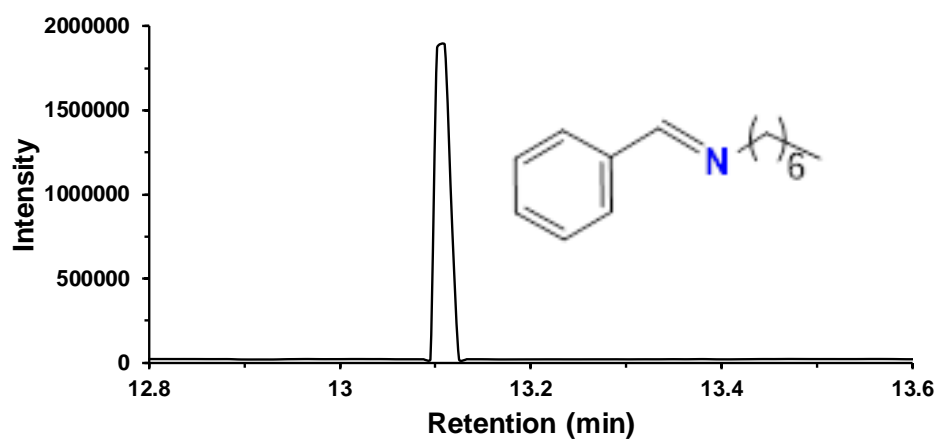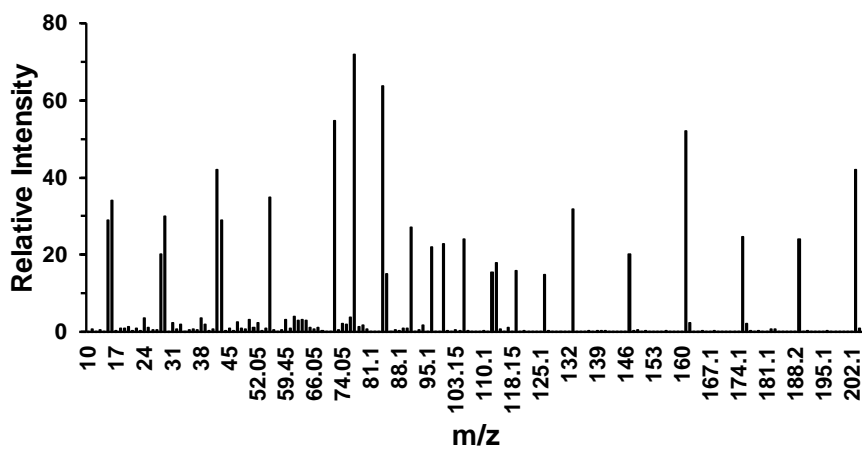

**Fig. S24** GC/MS of the reaction between heptylamine and toluene. The sample was analyzed with decane as an internal standard.

*Synthesis of N-(phenylmethylene)-1-octylamine:*

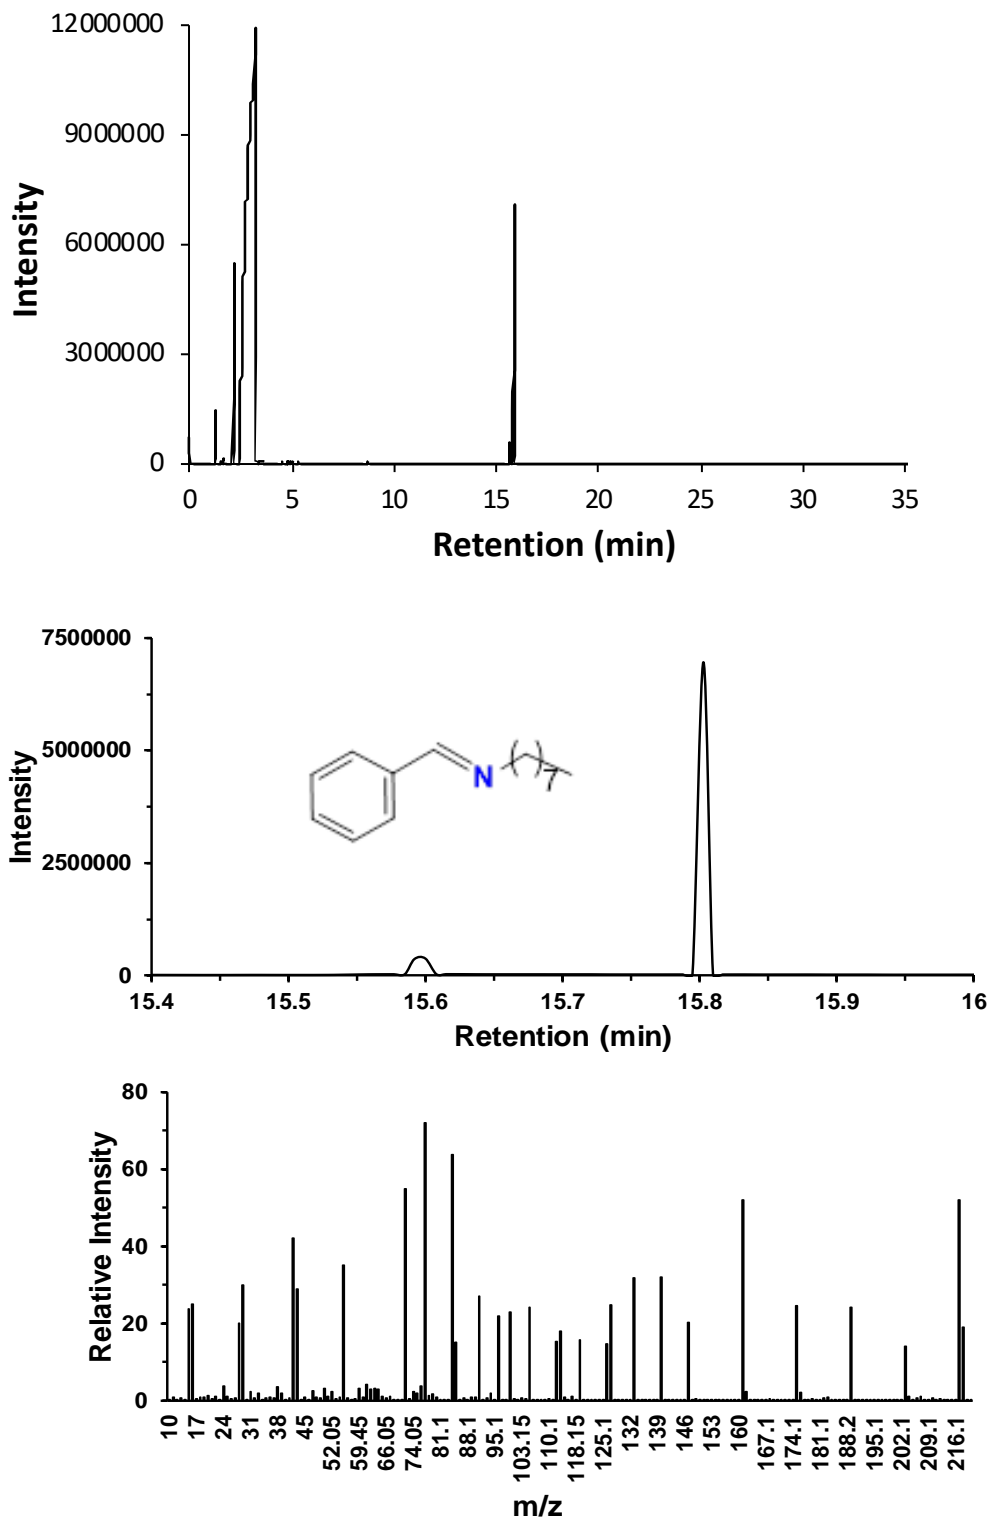

**Fig. S25** GC/MS of the reaction between octylamine and toluene. The sample was analyzed with decane as an internal standard.

*Synthesis of N-(phenylmethylene)-1-nonylamine:*

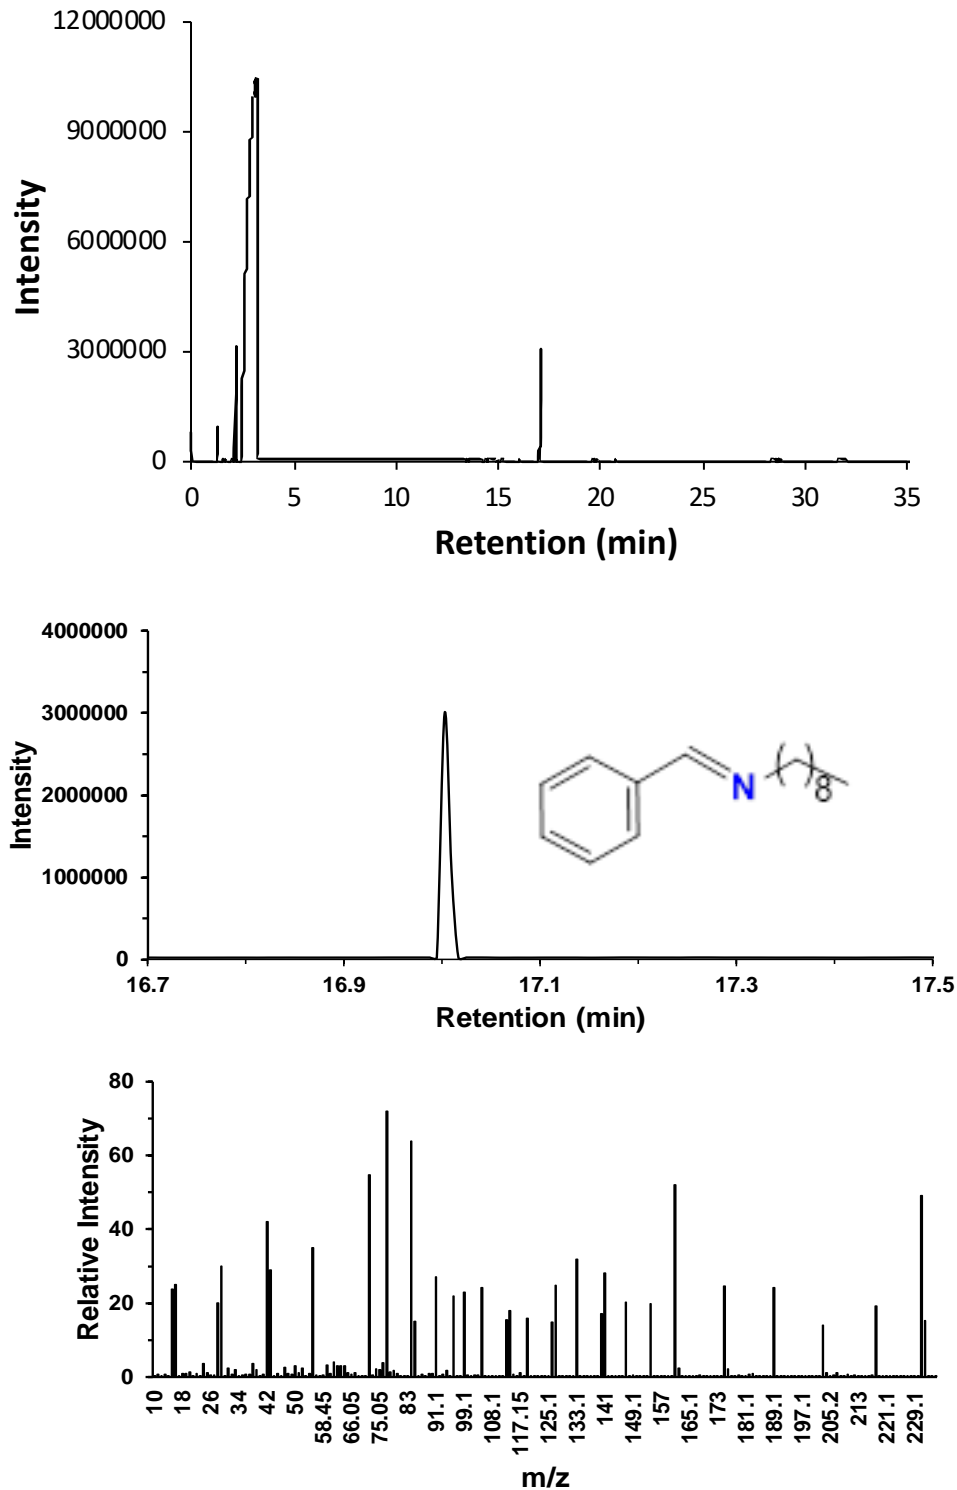

**Fig. S26** GC/MS of the reaction between nonylamine and toluene. Toluene (1 eq., 157.6 mg, 1.71 mmol), nonylamine (1 eq., 247.9 mg, 1.71 mmol) at 110 °C, 3 h. The sample was analyzed with decane as an internal standard.

*Synthesis of N-(phenylmethylene)-1-decylamine:*

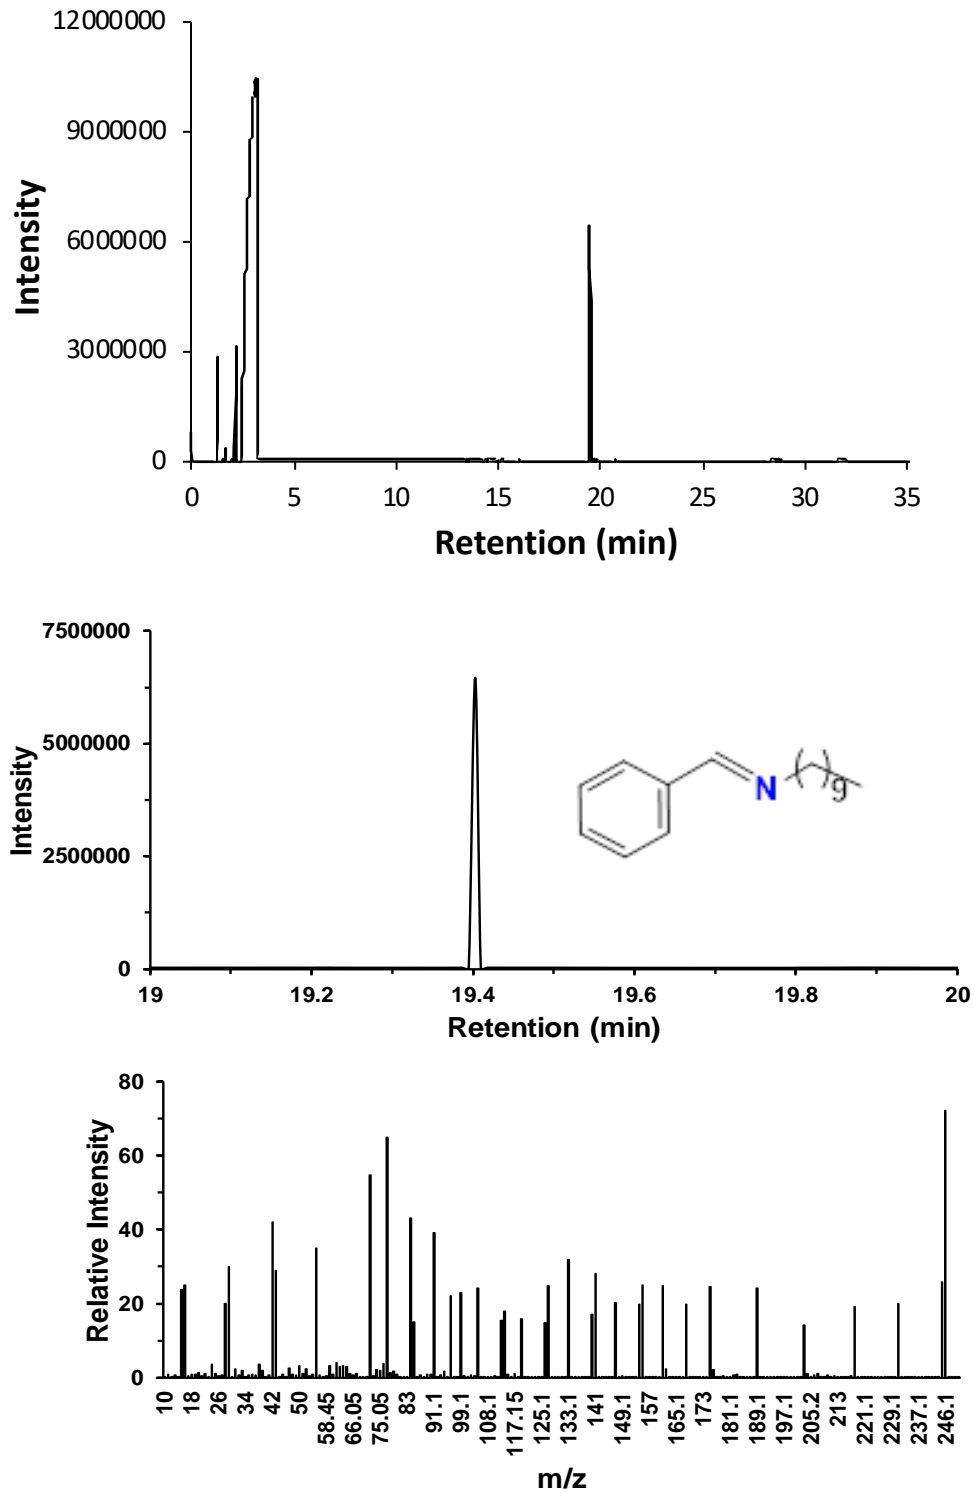

**Fig. S27** GC/MS of the reaction between decylamine and toluene. The sample was analyzed with decane as an internal standard.



*Synthesis of  $\alpha$ -methyl-N-(phenylmethylene)benzenemethanamine:*

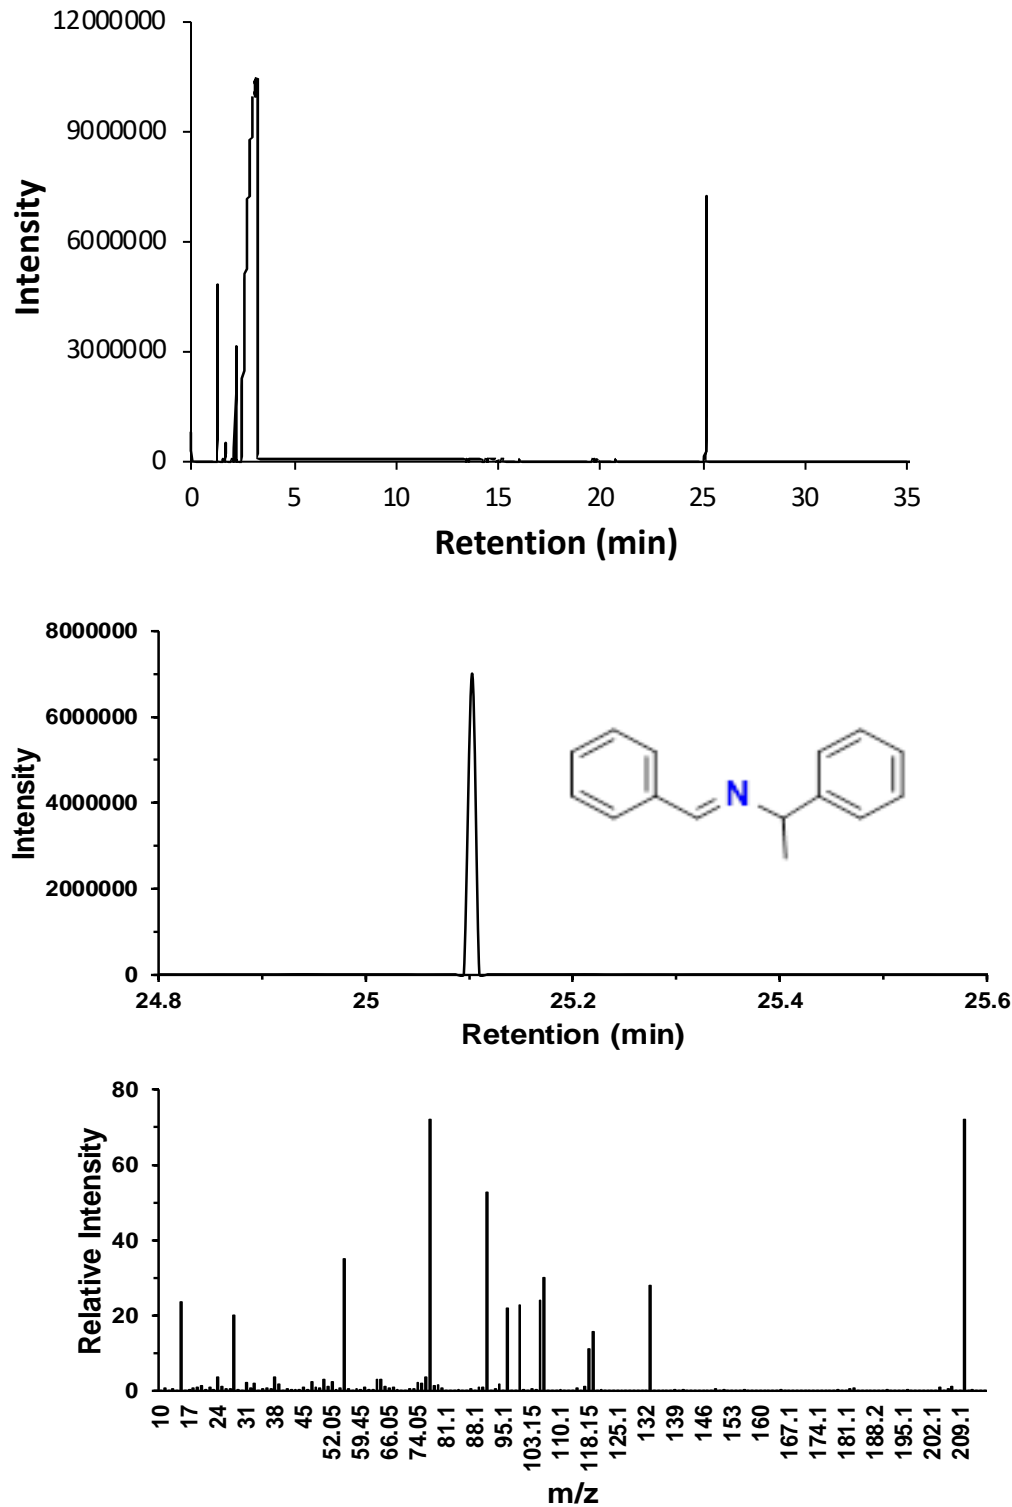

**Fig. S28** GC/MS of the reaction between  $\alpha$ -methylbenzylamine and toluene. The sample was analyzed with decane as an internal standard.

*Synthesis of N-(phenylmethylene)benzenamine:*

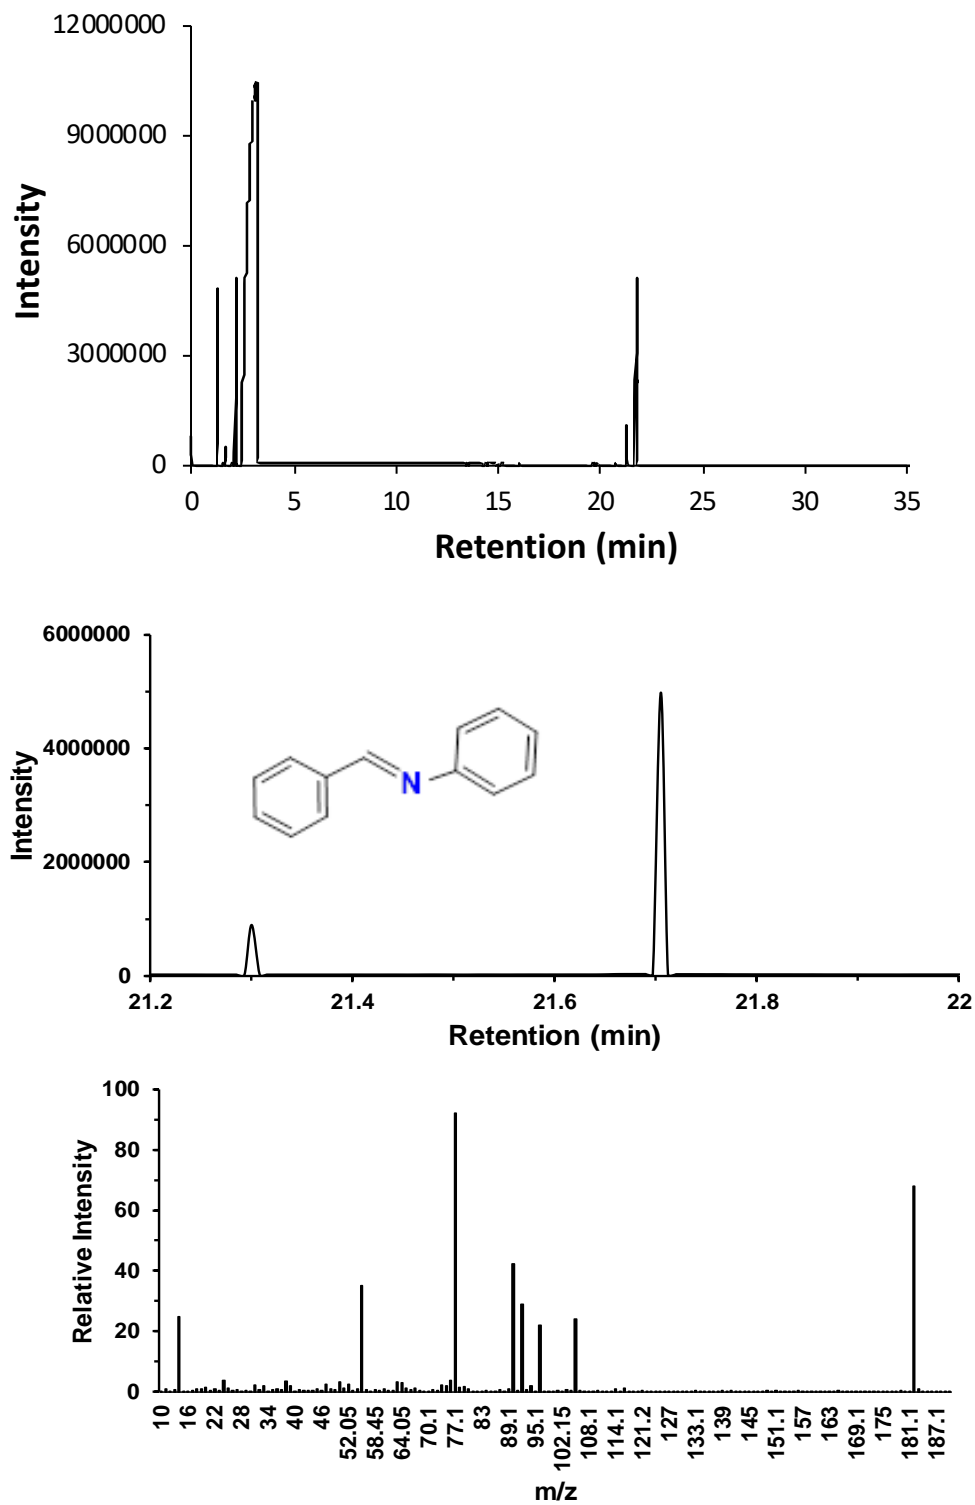

**Fig. S29** GC/MS of the reaction between aniline and toluene. The sample was analyzed with decane as an internal standard.

*Synthesis of N-(phenylmethylene)benzenemethanamine:*

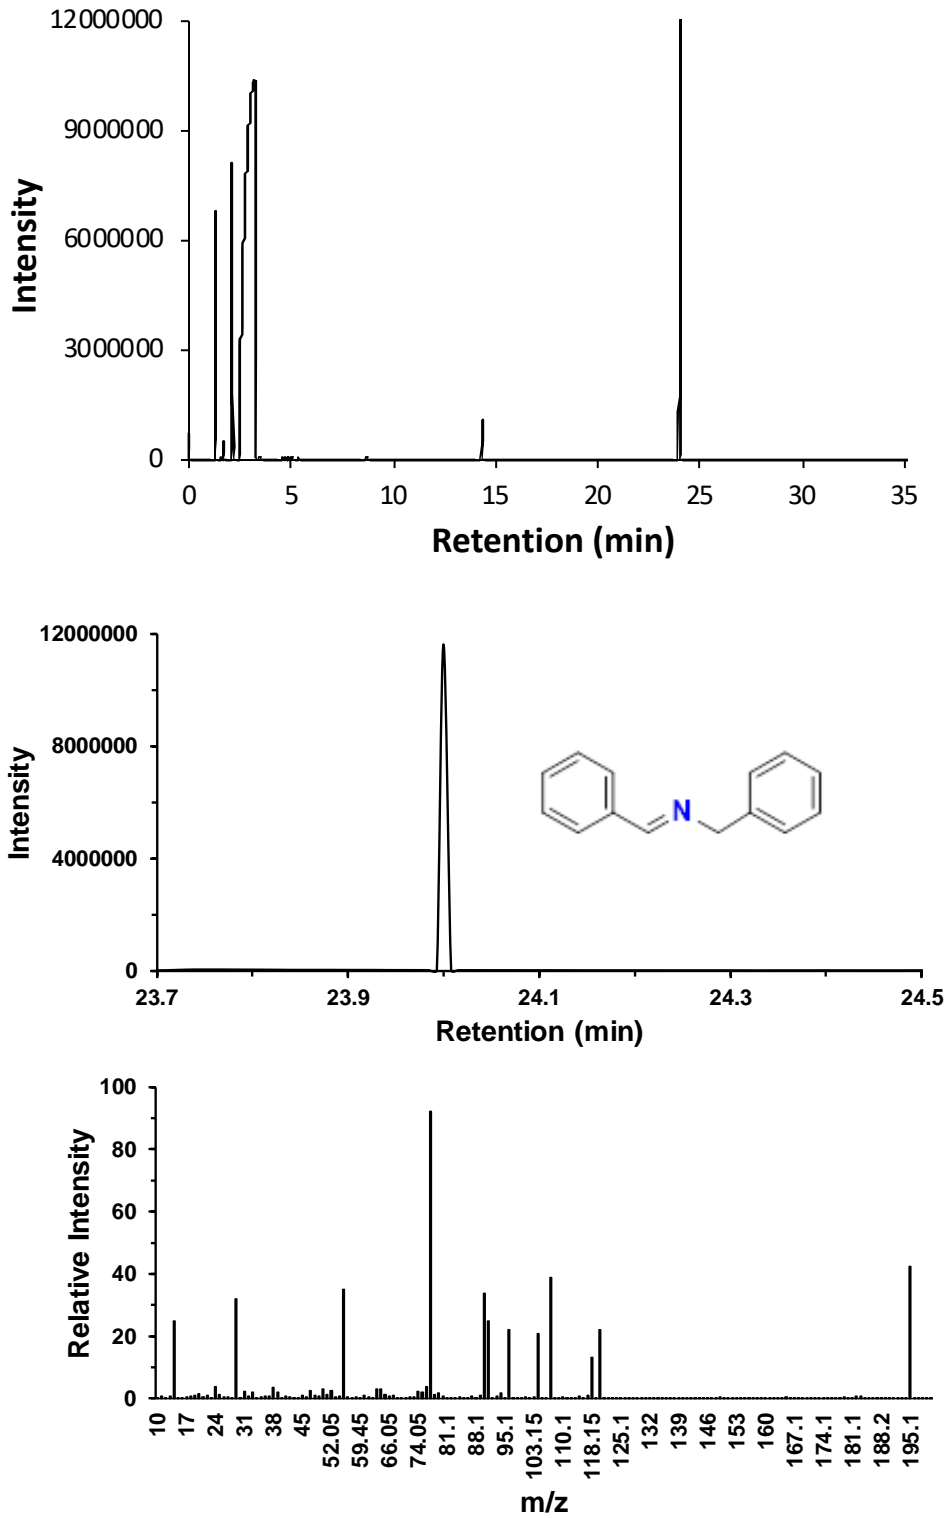

**Fig. S30** GC/MS of the reaction between benzylamine and toluene. The sample was analyzed with decane as an internal standard.

*Synthesis of 3-amino-N-propylbenzenemethanamine:*

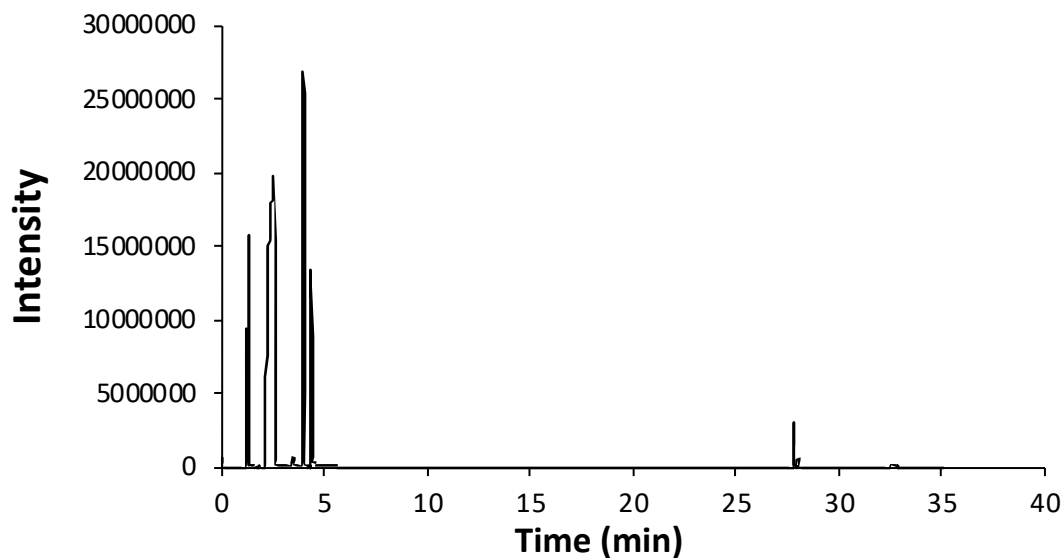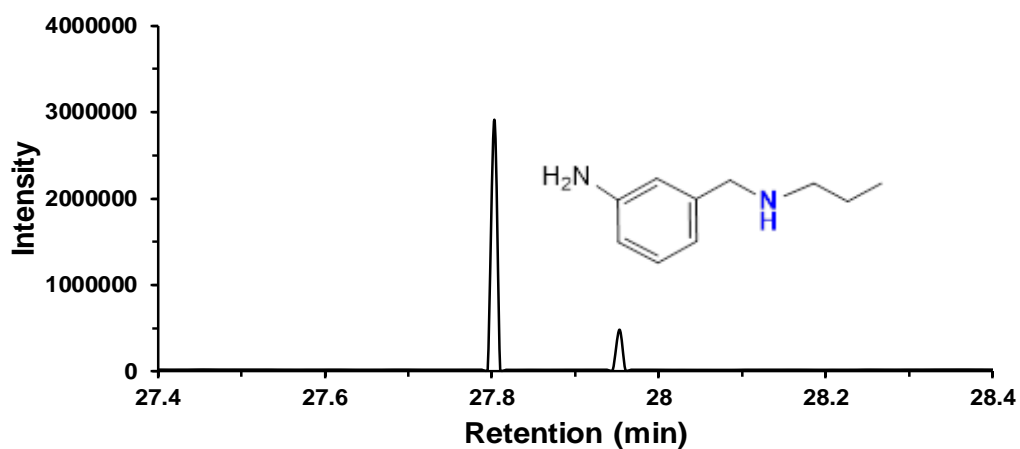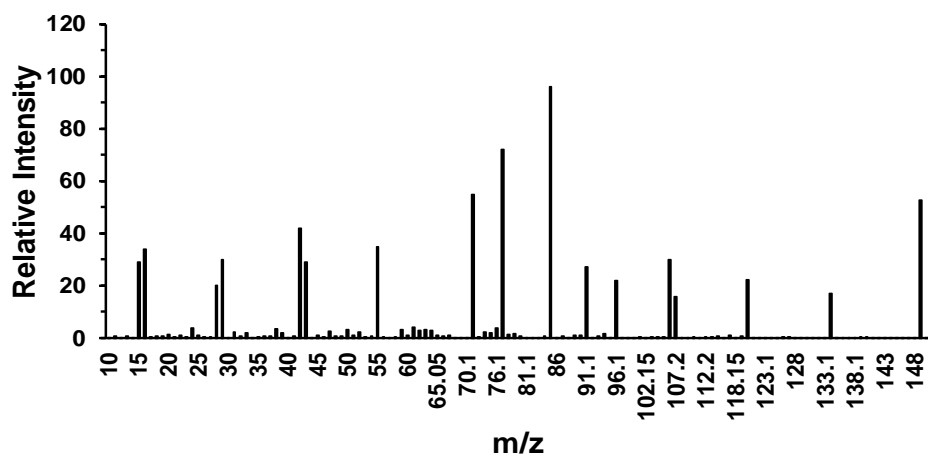

**Fig. S31** GC/MS of the reaction between propylamine and m-toluidine. The sample was analyzed with decane as an internal standard.

*Synthesis of 3-nitro-N-propylbenzenemethanamine:*

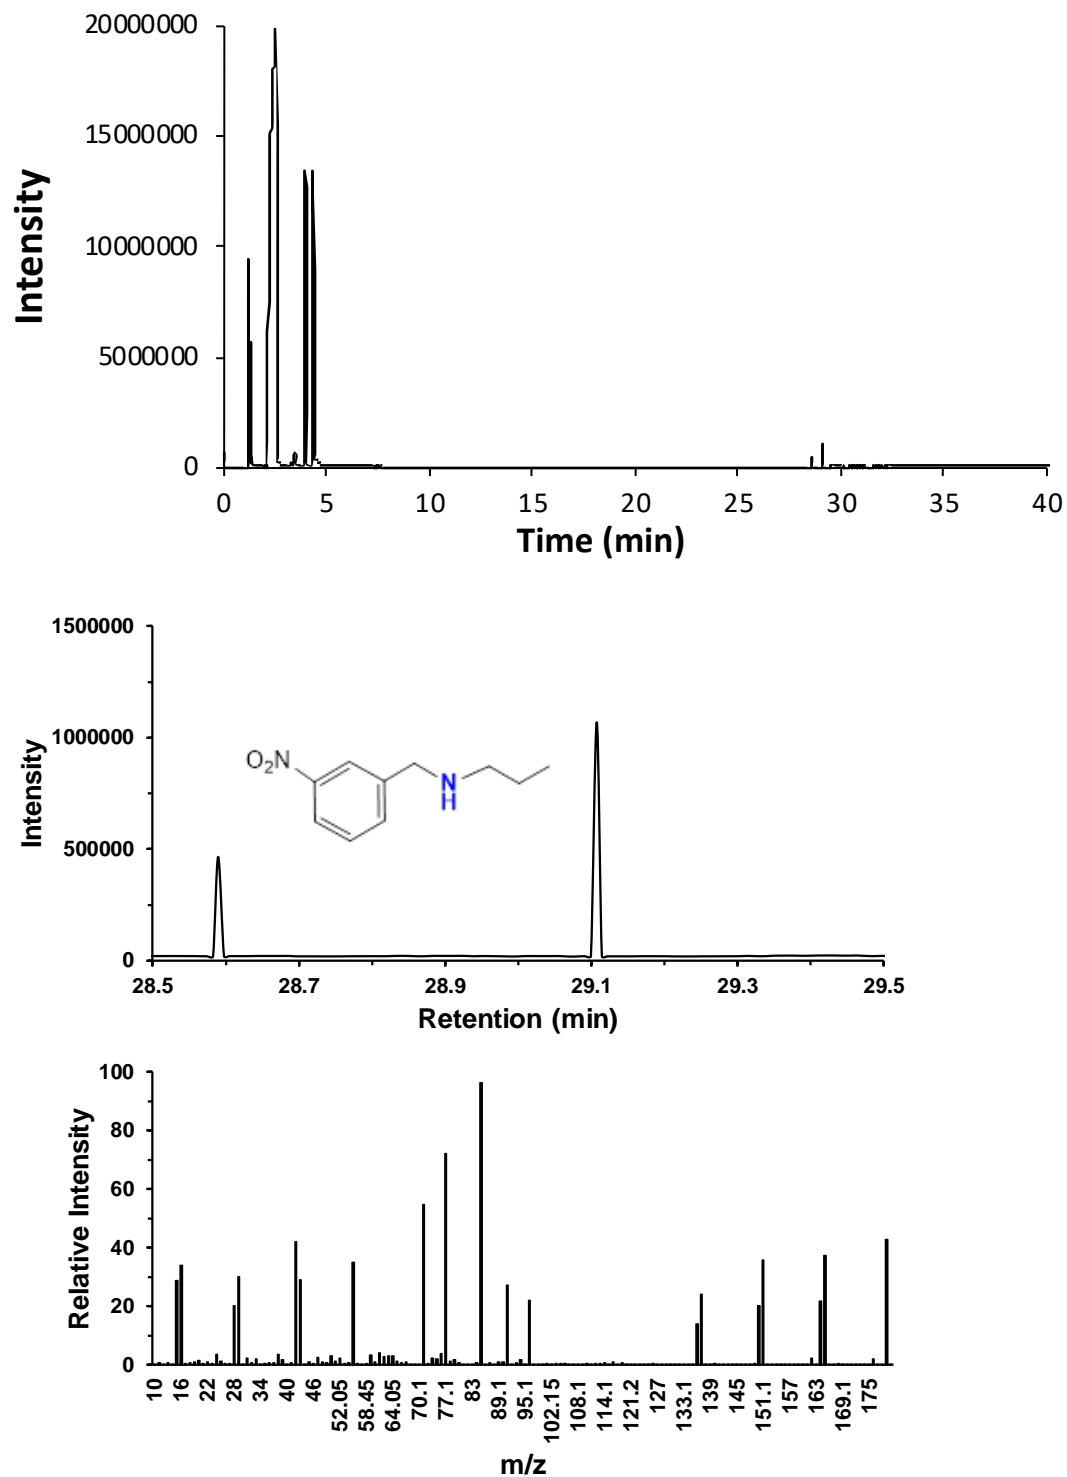

**Fig. S32** GC/MS of the reaction between propylamine and m-nitrotoluene. The sample was analyzed with decane as an internal standard.

*Synthesis of 3-methoxy-N-propylbenzenemethanamine:*

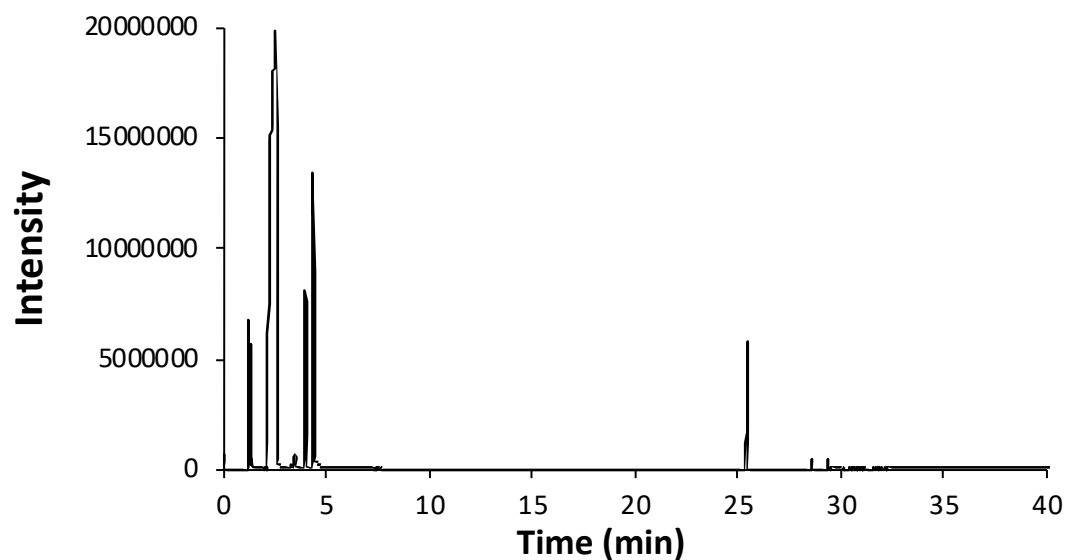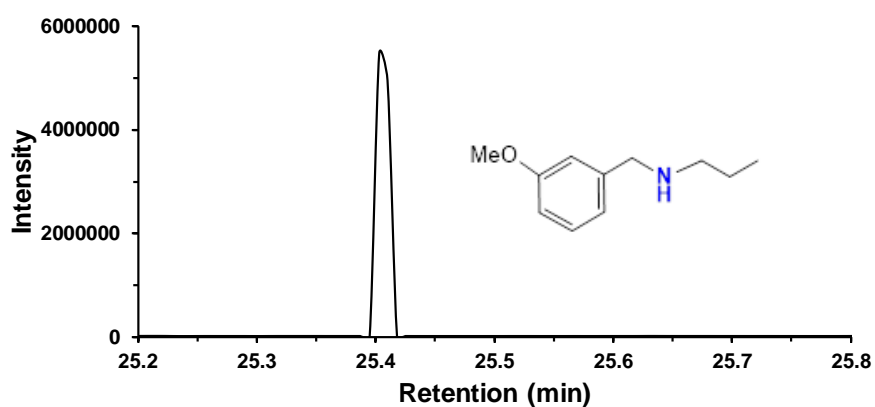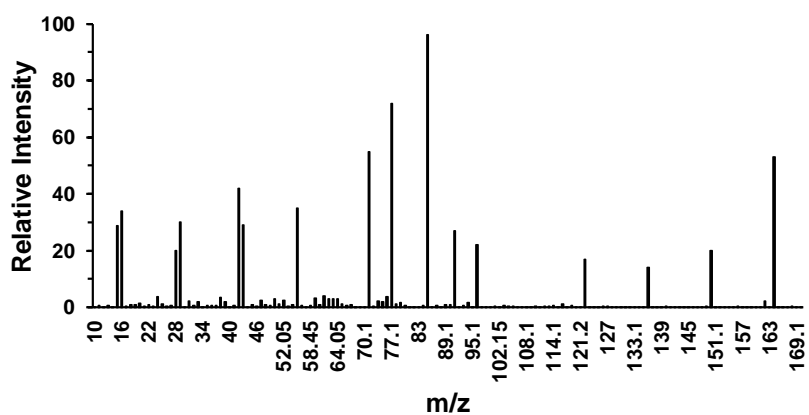

**Fig. S33** GC/MS of the reaction between propylamine and m-anisole. The sample was analyzed with decane as an internal standard.

*Synthesis of N-hexyl-4-methyl-benzenemethanamine:*

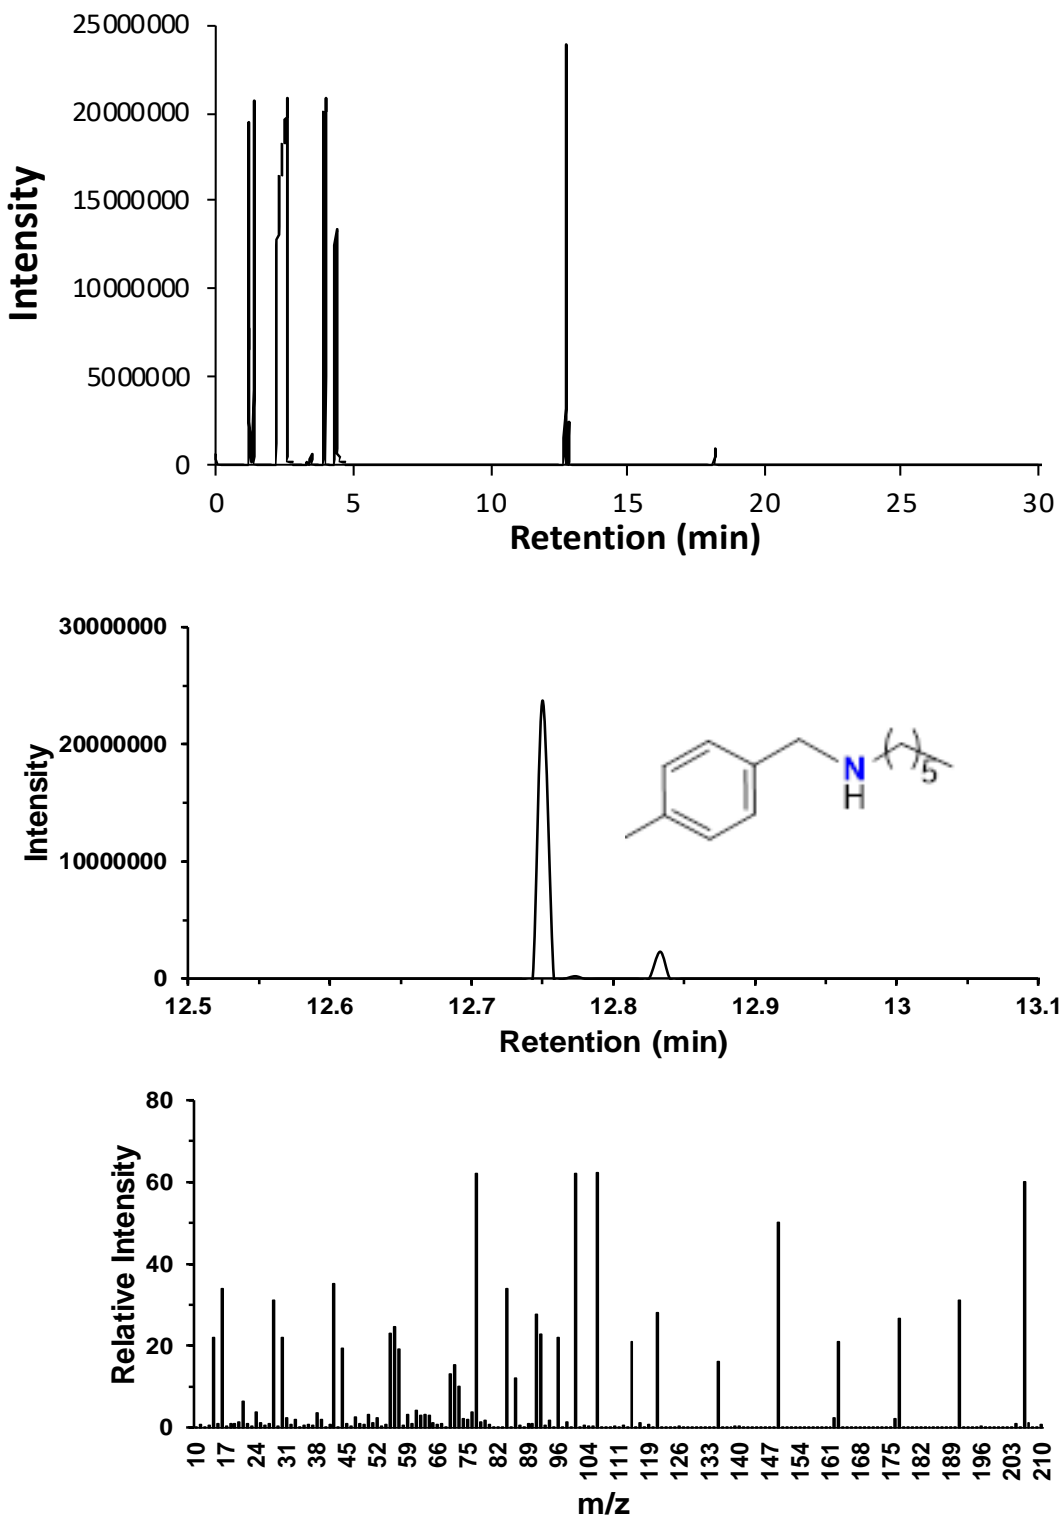

**Fig. S34** GC/MS of the reaction between hexylamine and p-xylene. The sample was analyzed with decane as an internal standard.

*Synthesis of N-hexyl- $\alpha$ -methylbenzenemethanamine:*

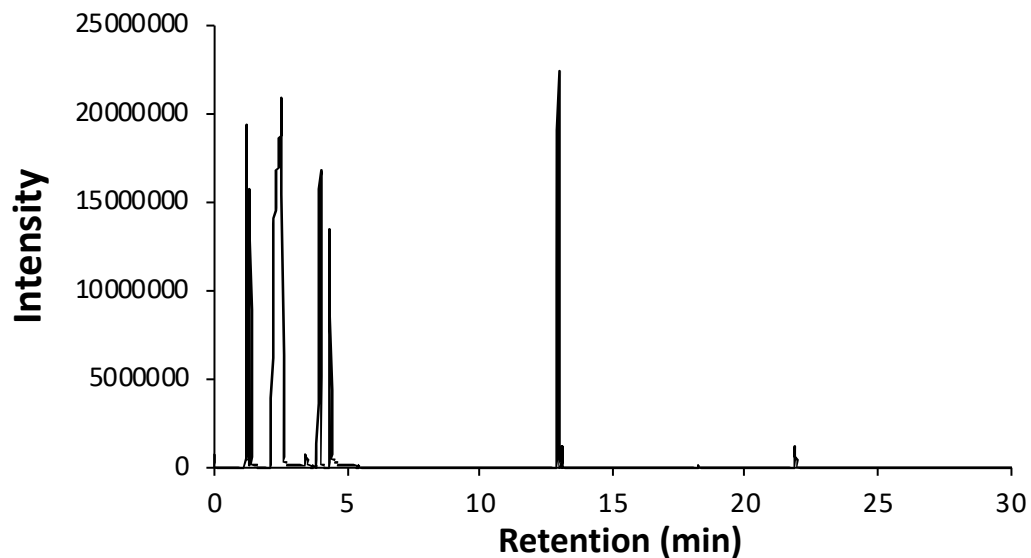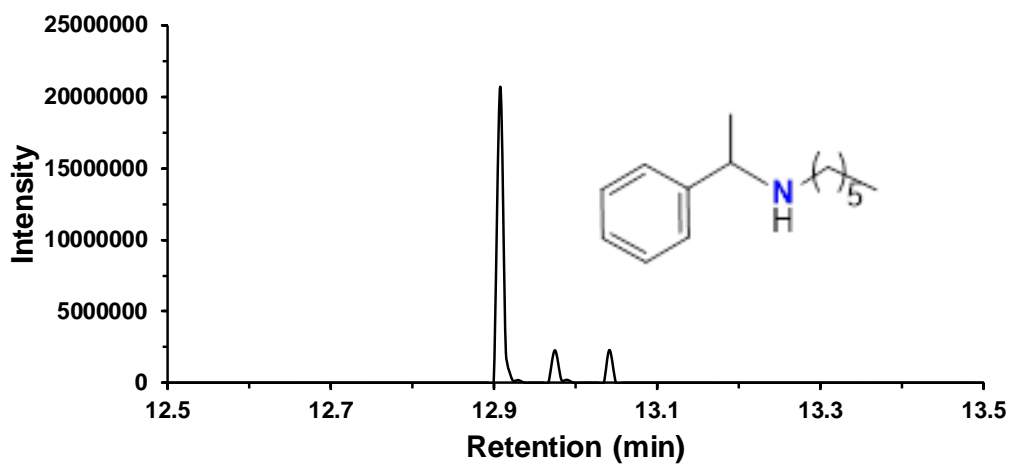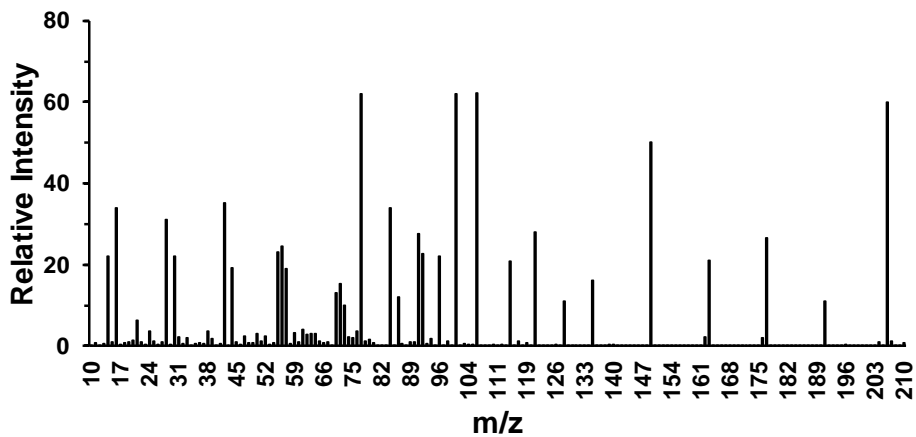

**Fig. S35** GC/MS of the reaction between hexylamine and ethylbenzene. The sample was analyzed with decane as an internal standard.



*Synthesis of N-hexyl-(1-vinylcyclohexyl)amine:*

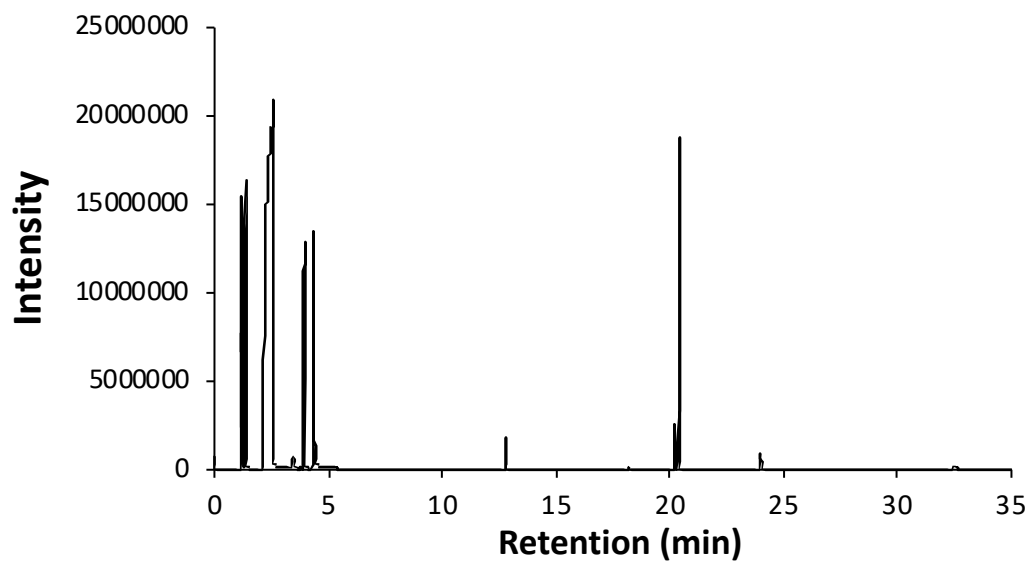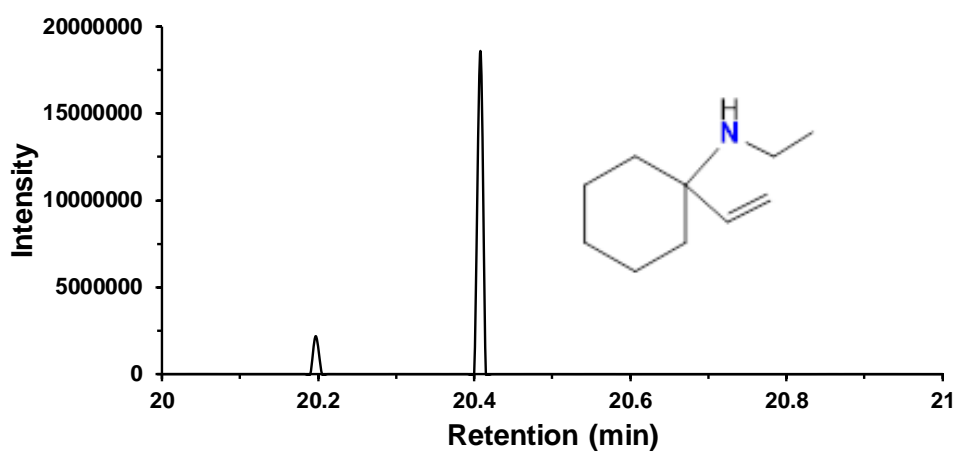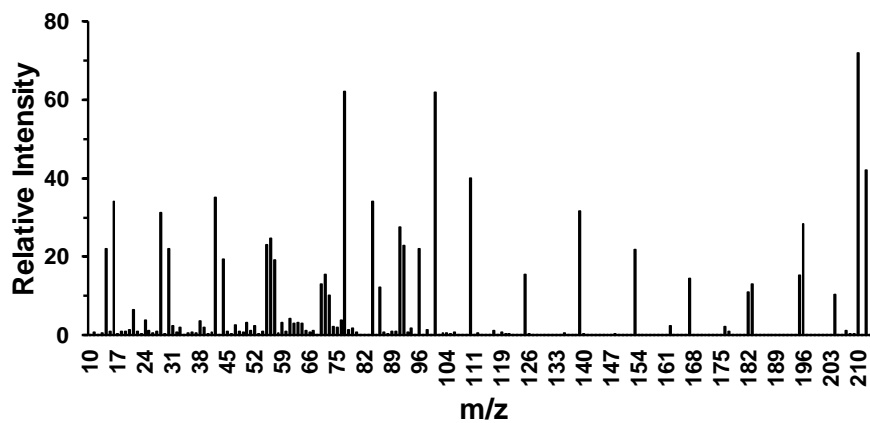

**Fig. S36** GC/MS of the reaction between hexylamine and vinylcyclohexane. The sample was analyzed with decane as an internal standard.

*Synthesis of N-hexylcyclohexanamine:*

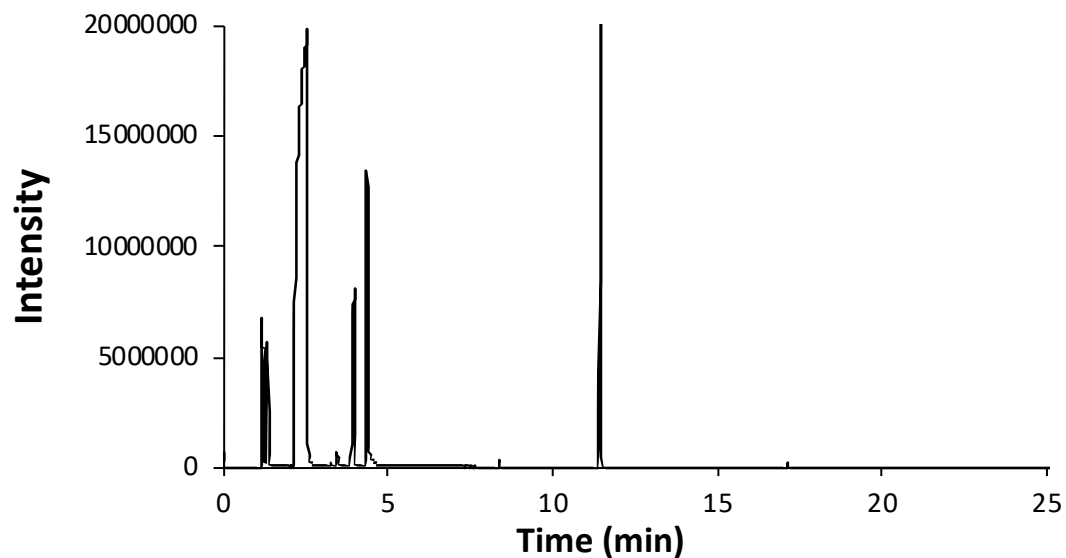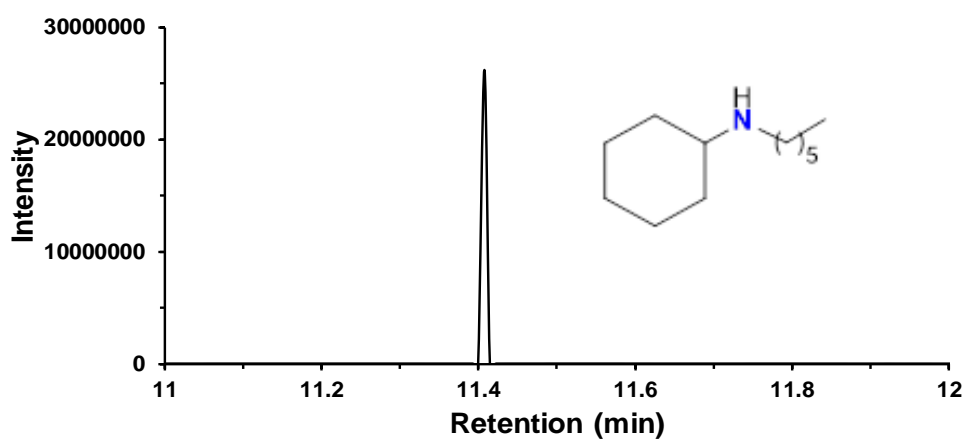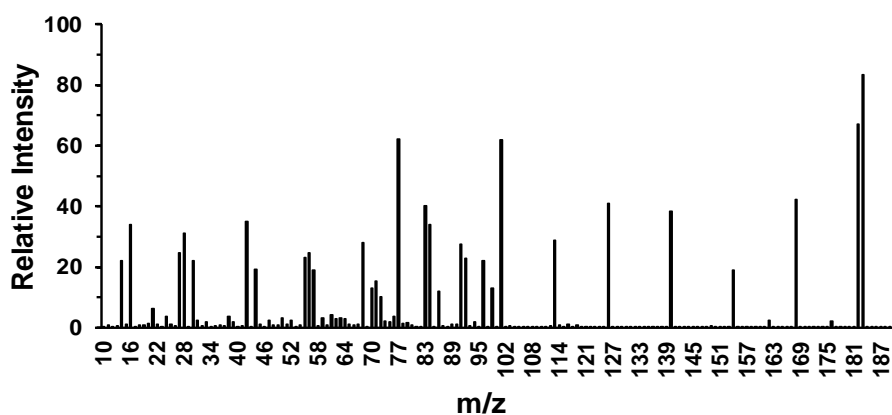

**Fig. S37** GC/MS of the reaction between hexylamine and cyclohexane. The sample was analyzed with decane as an internal standard.

*Synthesis of N-(4-methylbenzyl)-3-phenylpropan-1-amine:*

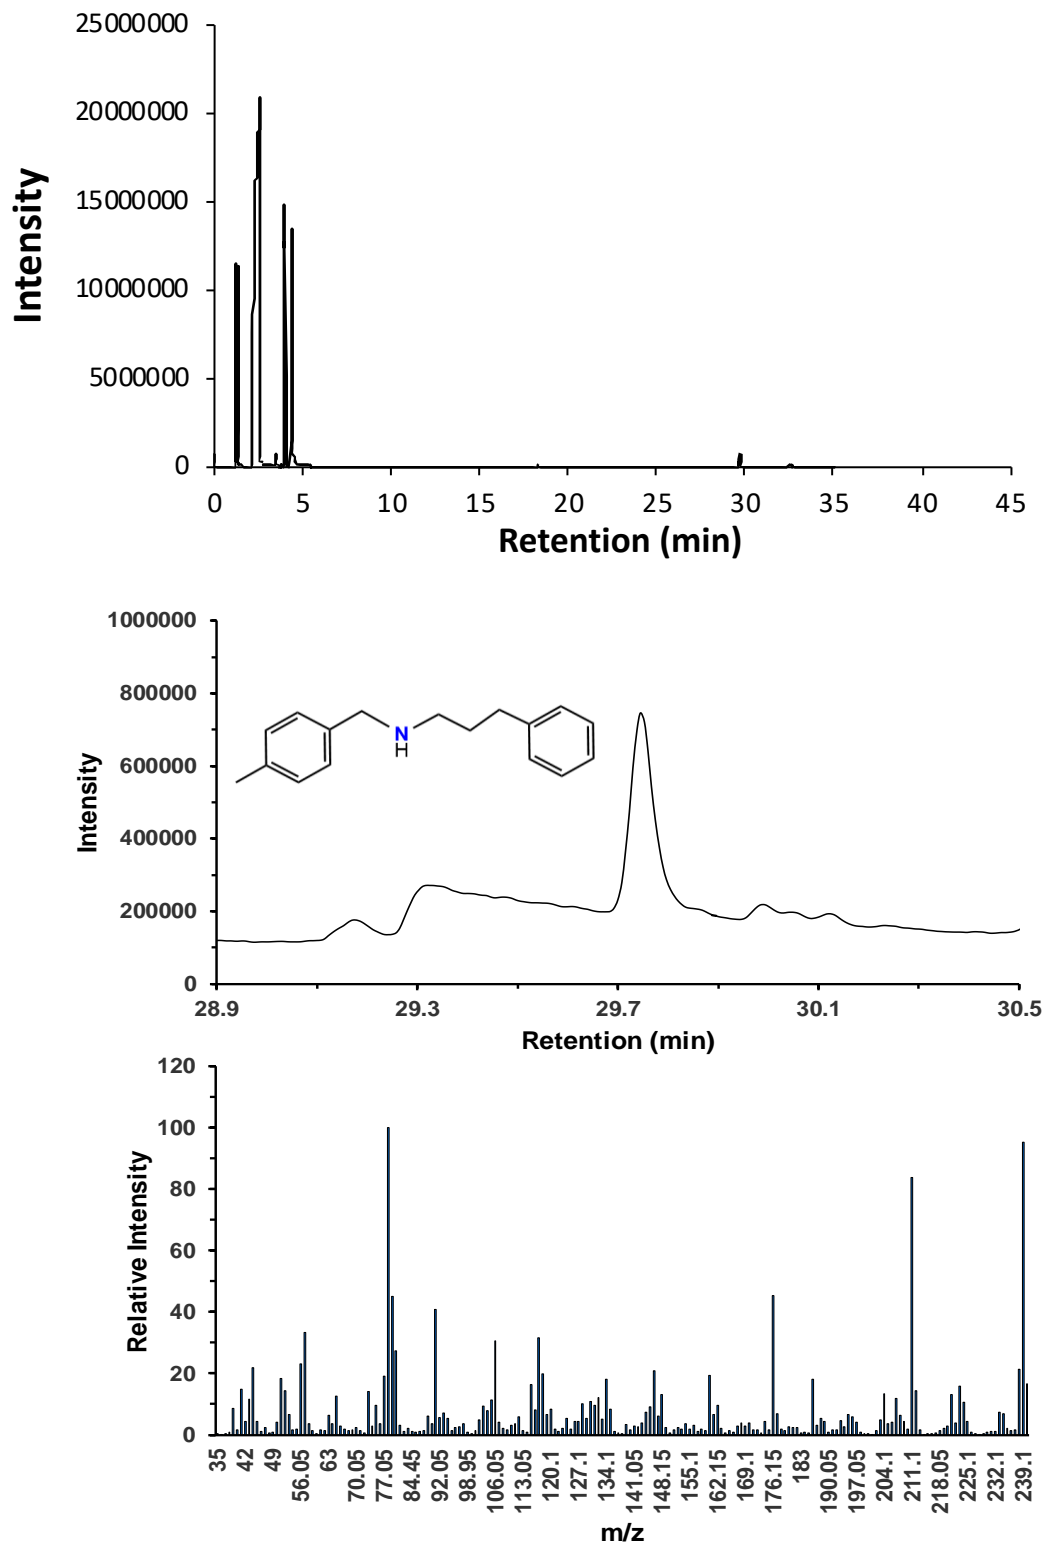

**Fig. S38** GC/MS of the reaction between 3-phenylpropylamine and *p*-xylene. The sample was analyzed with decane as an internal standard.

*Synthesis of N-(4-(tert-butyl)benzyl)-3-phenylpropan-1-amine:*

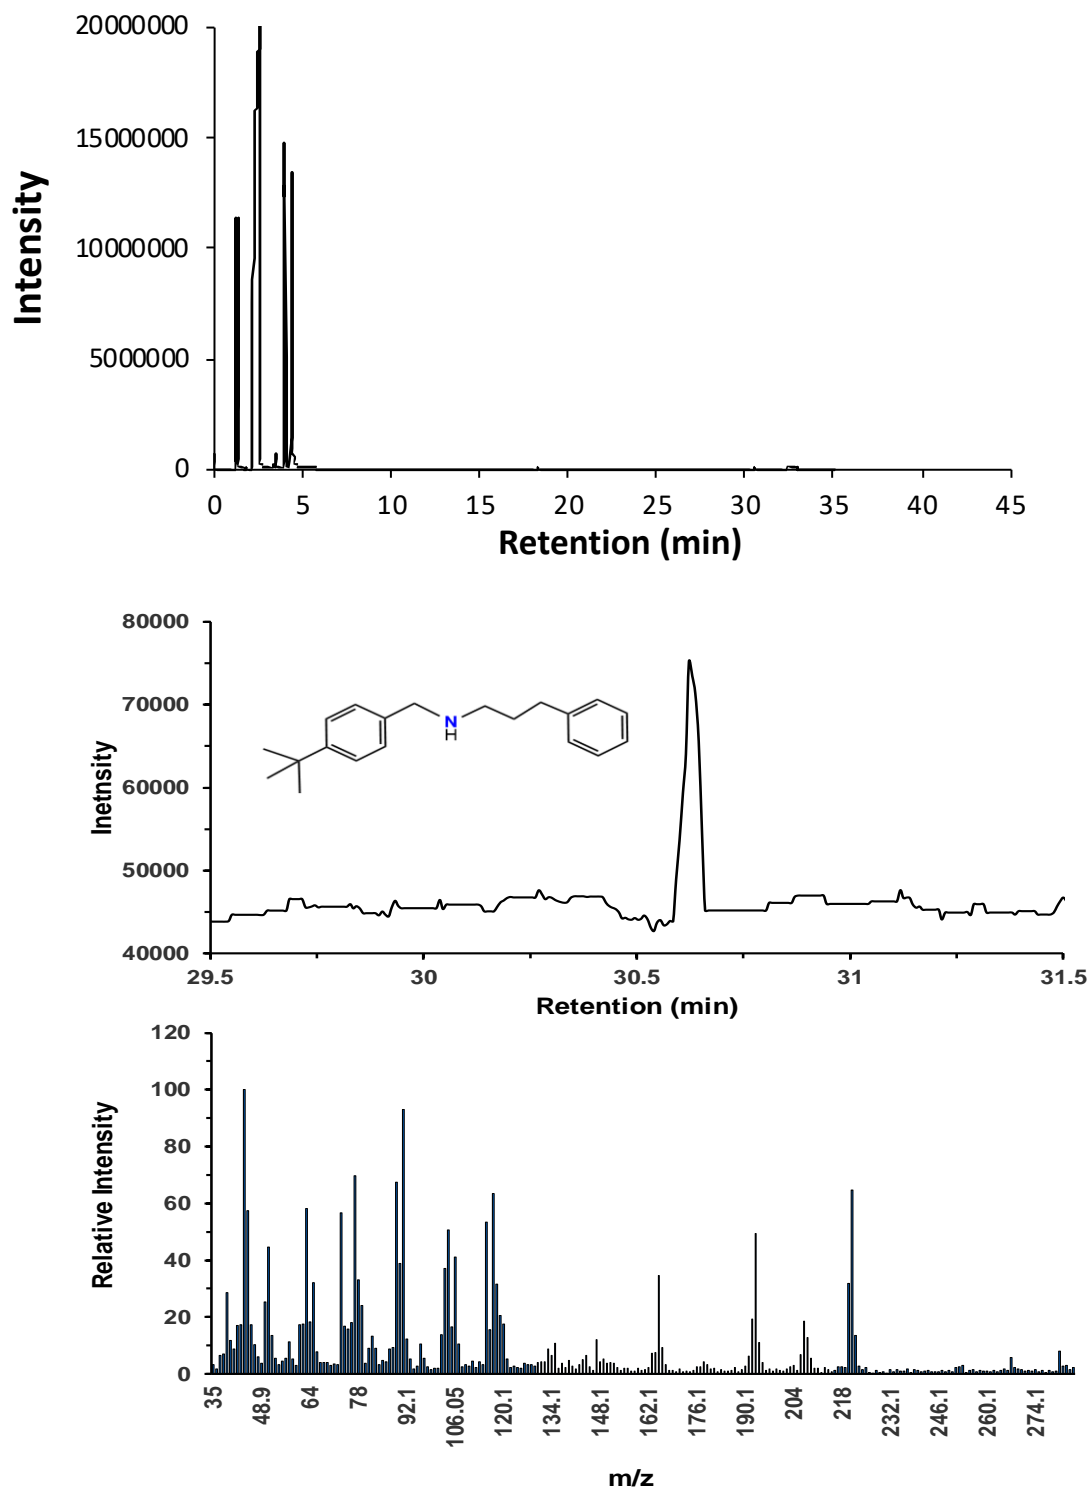

**Fig. S39** GC/MS of the reaction between 3-phenylpropylamine and 4-*tert*-butyltoluene. The sample was analyzed with decane as an internal standard.

*Synthesis of N-phenylbenzenemethanamine-d:*

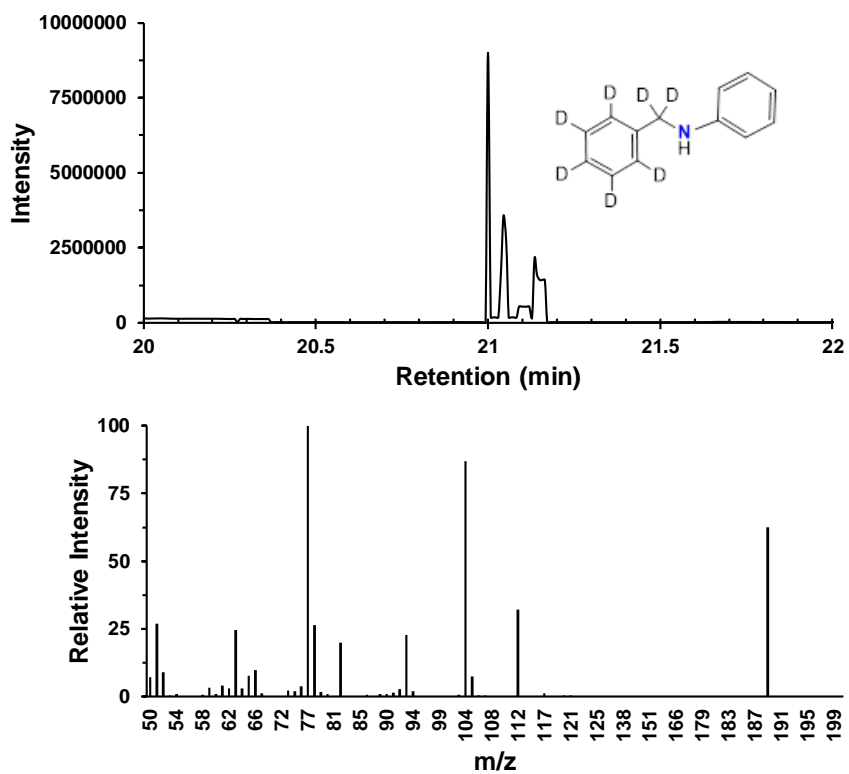

**Fig. S40** GC/MS of the reaction between aniline and toluene-d<sup>8</sup>. The sample was analyzed with decane as an internal standard.

*Synthesis of N-propylbenzenemethanamine-d:*

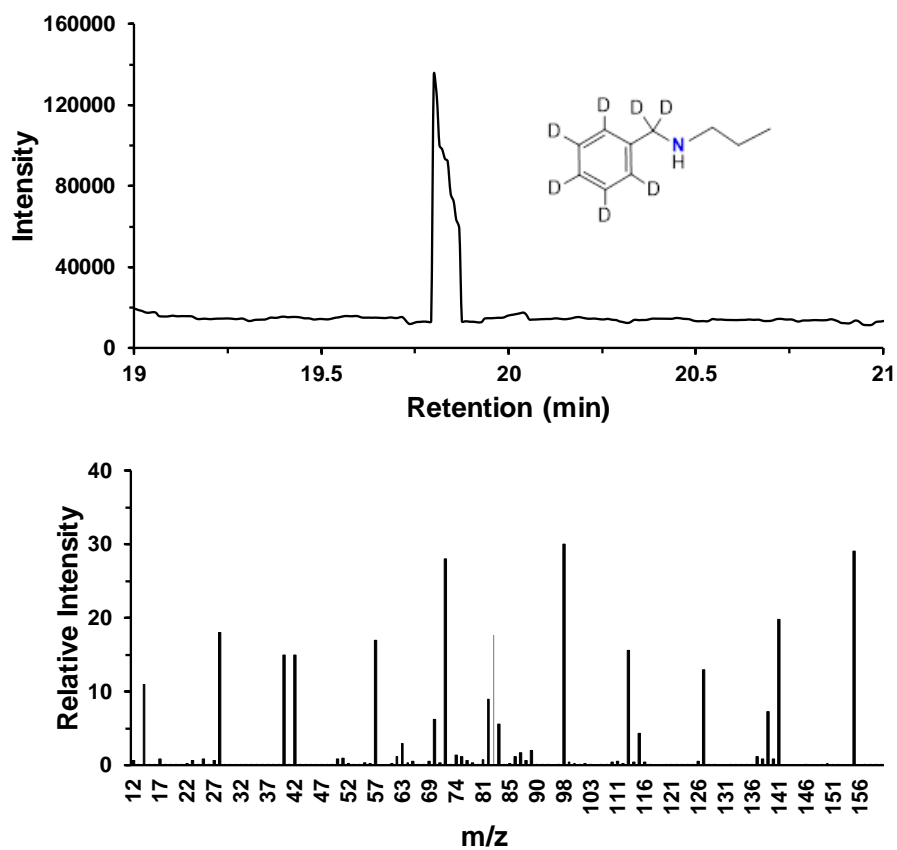

**Fig. S41** GC/MS of the reaction between propylamine and toluene-*d*<sup>8</sup>. The sample was analyzed with decane as an internal standard.

*Synthesis of N-hexylbenzenemethanamine-d:*

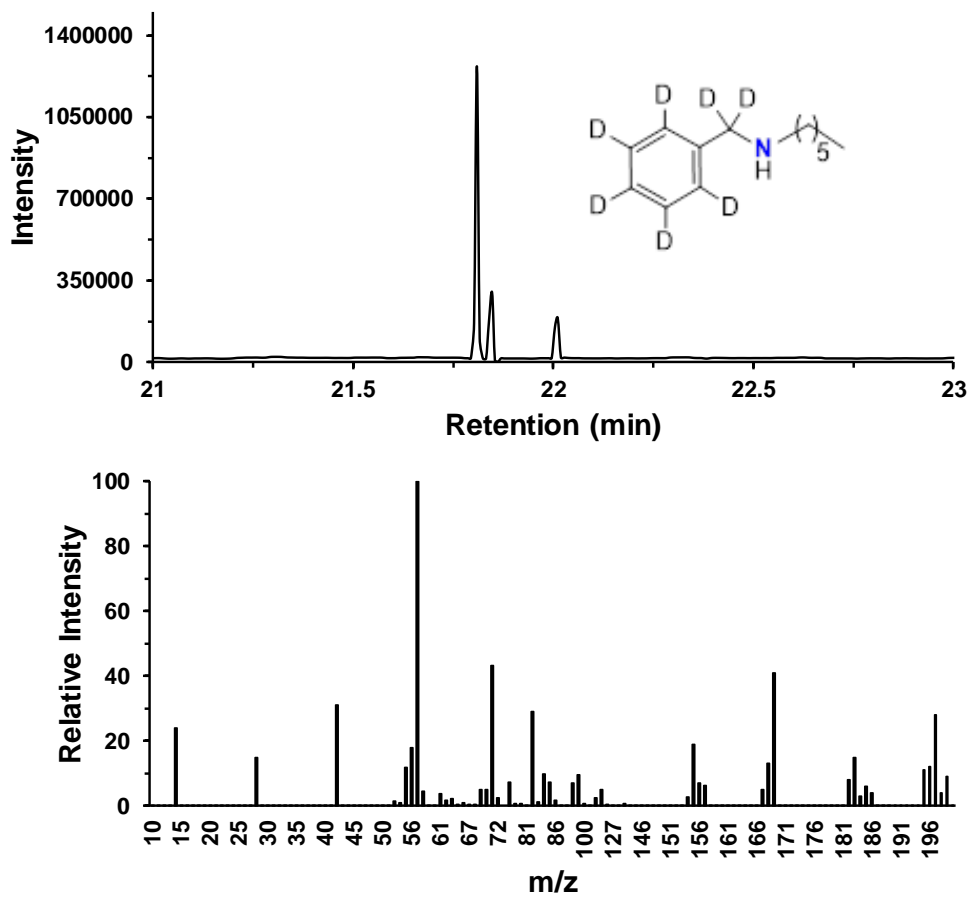

**Fig. S42** GC/MS of the reaction between hexylamine and toluene-d<sup>8</sup>. The sample was analyzed with decane as an internal standard.

*Synthesis of dibenzylamine-d:*

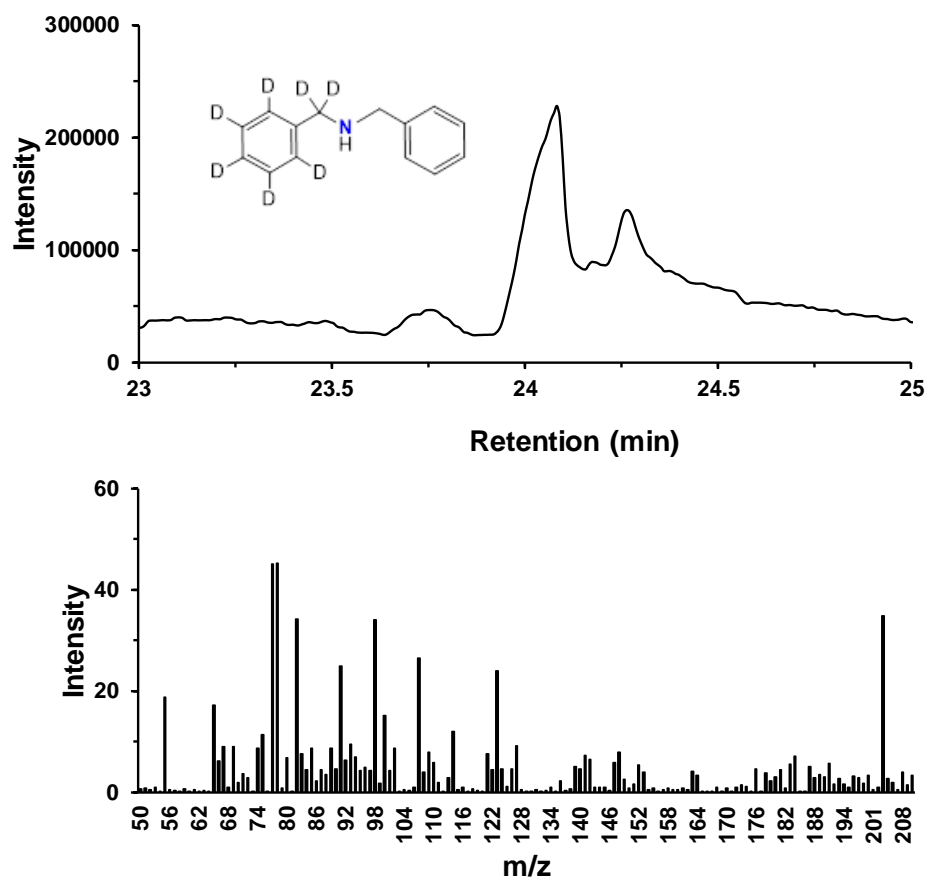

**Fig. S43** GC/MS of the reaction between benzylamine and toluene-d<sup>8</sup>. The sample was analyzed with decane as an internal standard.



*Synthesis of cyclizine:*

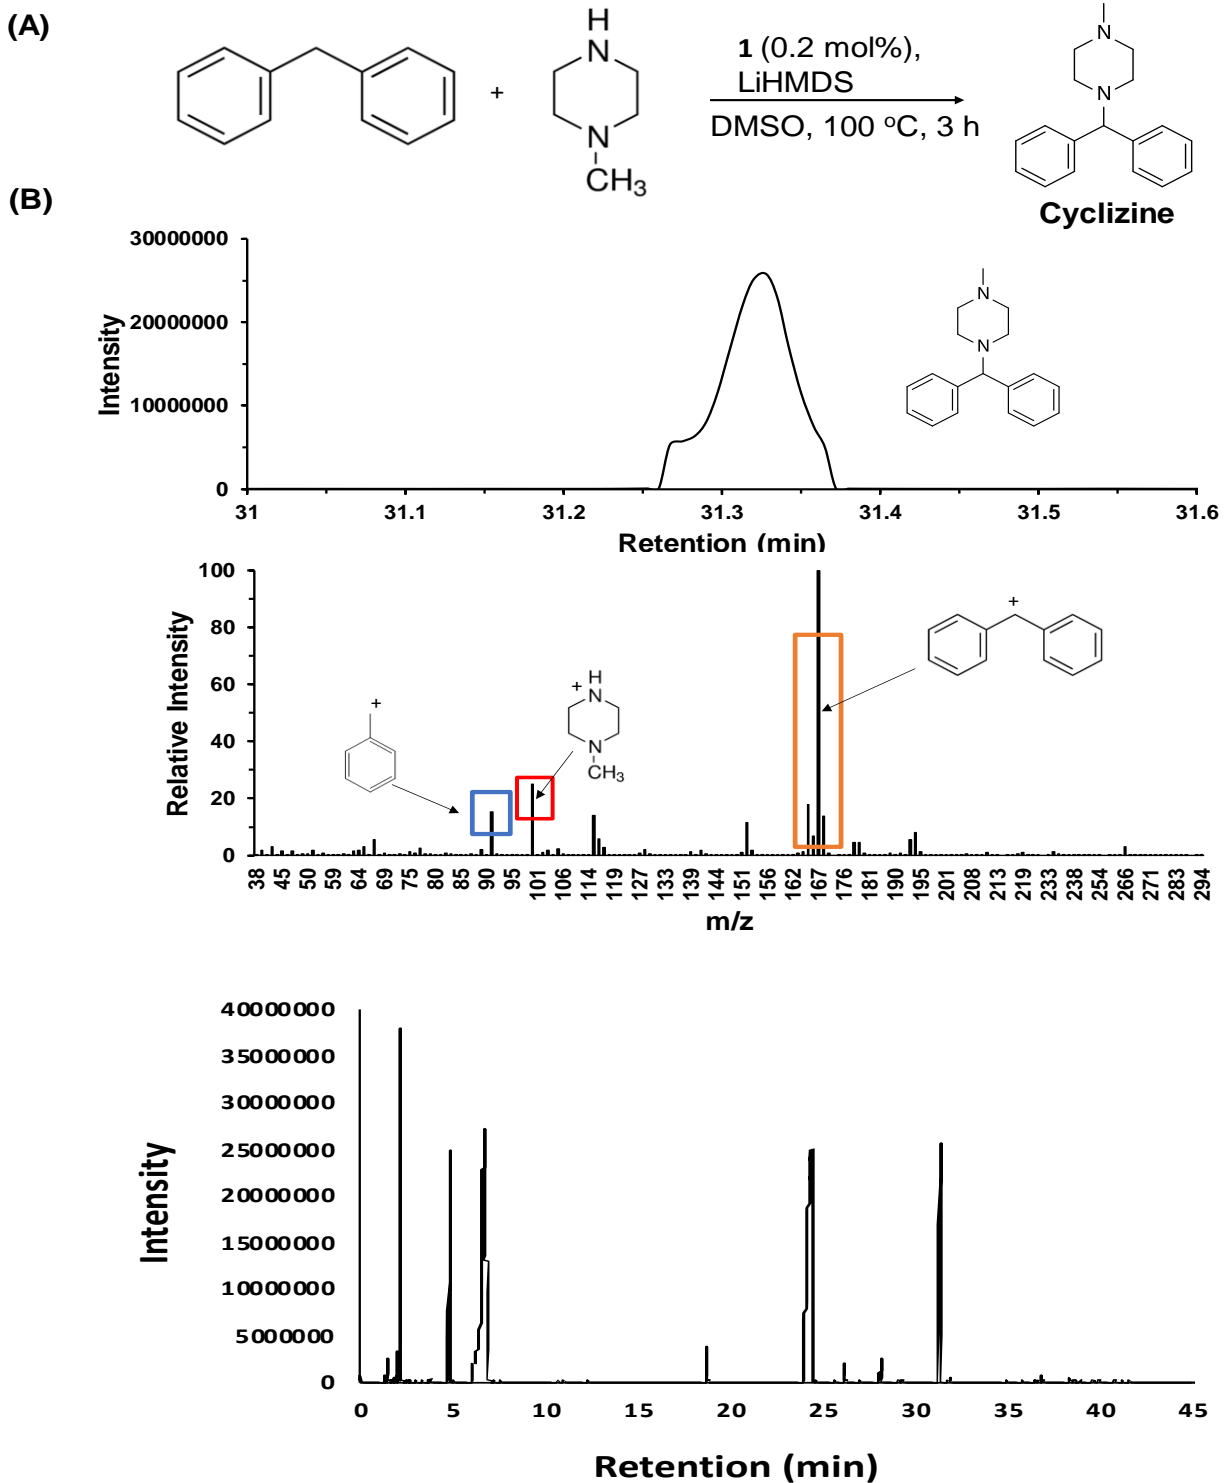

**Fig. S44** A) One-step synthesis of cyclizine using **1** and B) GC/MS of cyclizine ( $M_w$  266).

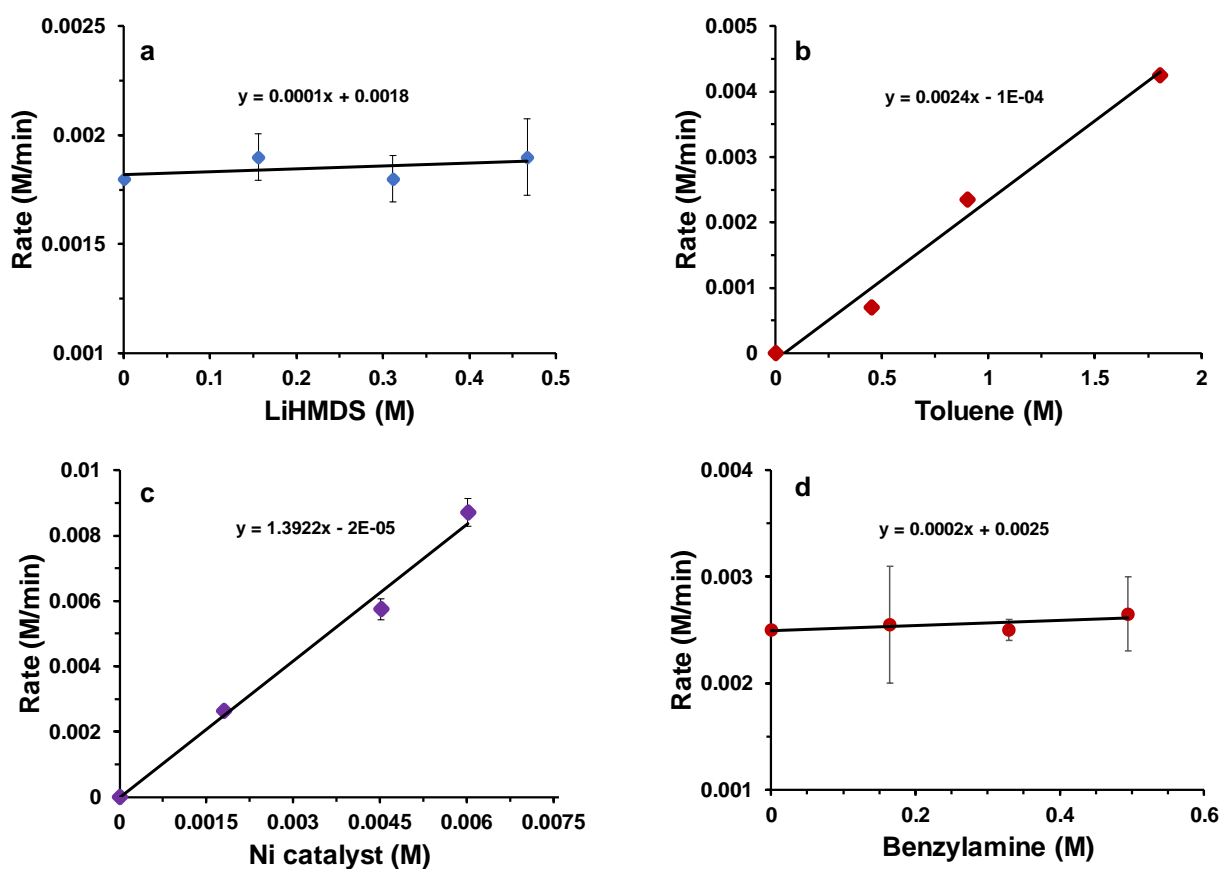

**Fig. S45** Effect of a) LiHMDS, b) toluene, c) **1**, and d) benzylamine concentrations on the rate of dibenzylamine product yield at 110 °C.

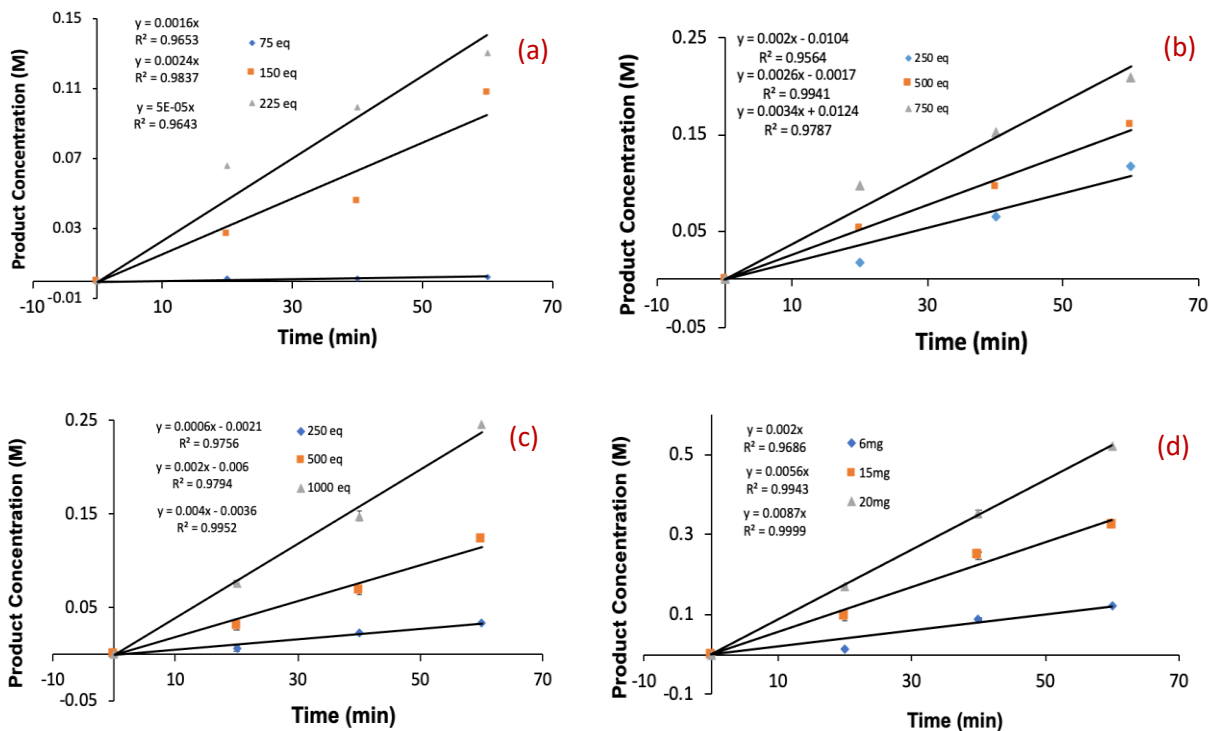

**Fig. S46** Formation of benzylamine product in increasing concentrations of a) base (0.16–0.47 M), b) benzylamine (0.16–0.49 M), c) toluene substrate (0.45–1.80 M) and d) catalyst loads (1.2–4.0 mol %). The inset term “eq” represents the molar equivalent amount of starting reagent with respect to one molar equivalent of catalyst **1** (2.0 mg; 3.46  $\mu$ mol) used in the reaction. The reactions were performed in DMSO (5.0 mL) at 110 °C. Data represents an average of two runs.

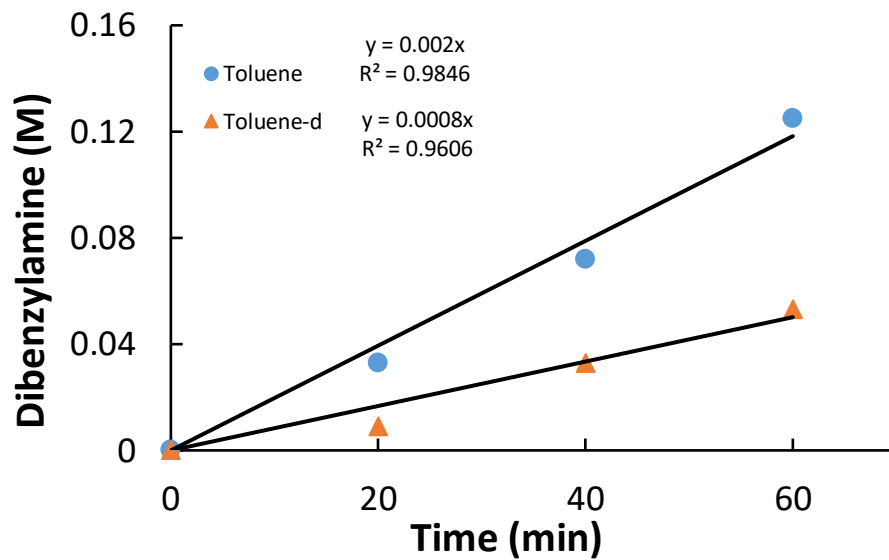

**Fig. S47** The plot of product concentration vs. time using toluene and toluene-d8 over 1 h catalyzed by **1** in presence of LiHMDS at 110 °C.

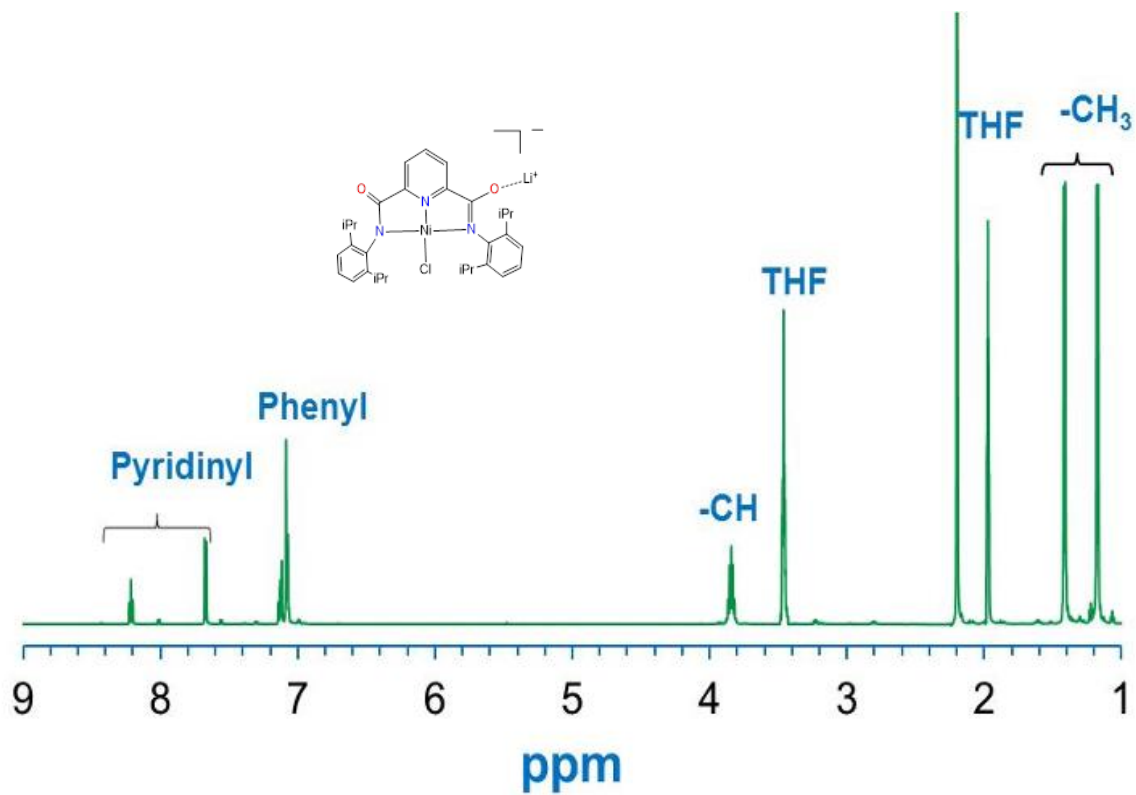

**Fig. S48**  $^1\text{H}$  NMR of nickel (II) complex (1).

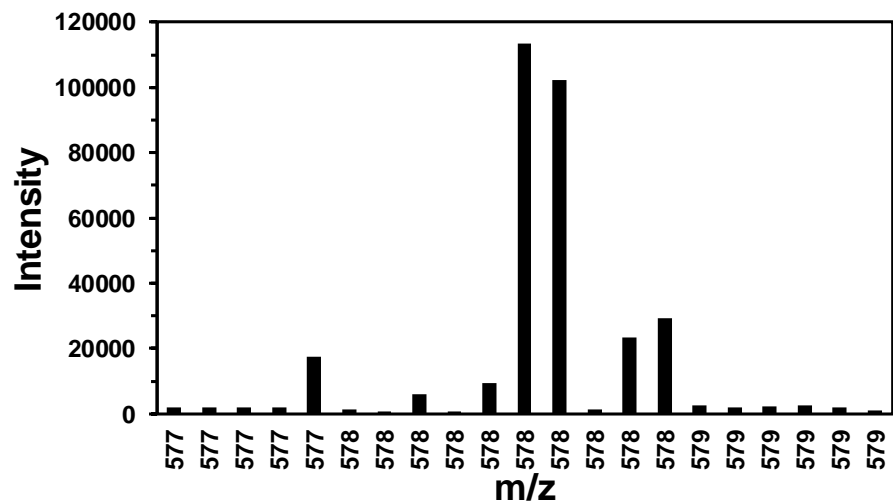

**Fig. S49** ESI-MS of nickel (II) complex (**1**); negative ion mode; m/z 578.

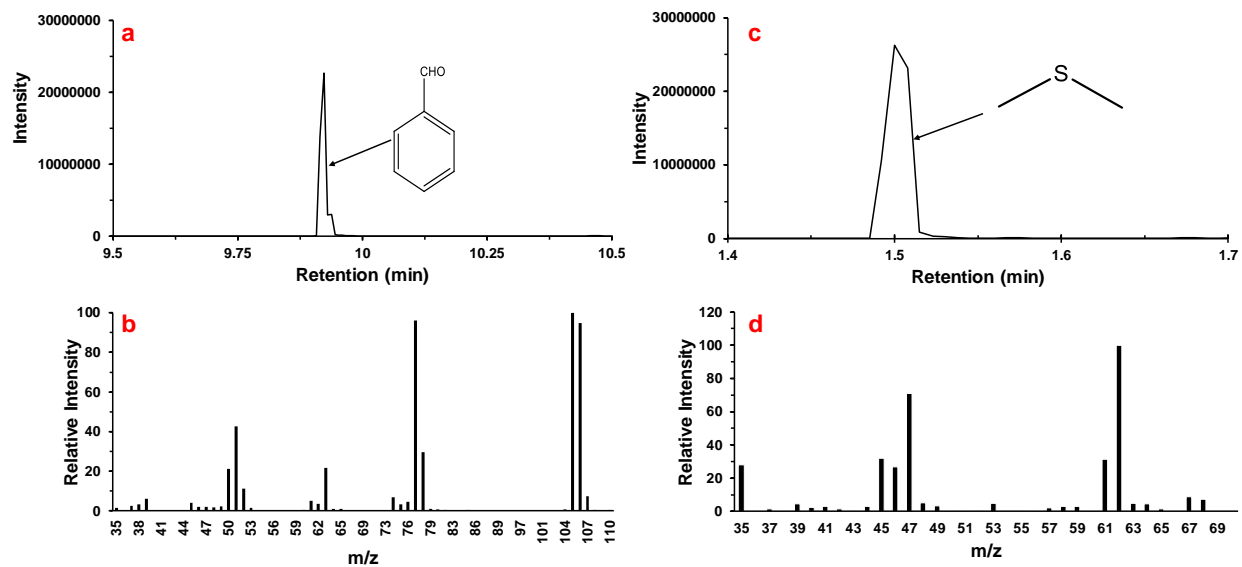

**Fig. S50** GC/MS analysis of benzaldehyde (a and b) and dimethyl sulfide (c and d) formed during the reaction of toluene in the presence of **1** and KO<sup>t</sup>Bu. Samples were analyzed using an internal standard of decane.

### Calibration curve for GC analysis.

Dibenzylamine (3j) (purity 98.55%) was purchased from SD fine chemical India. Accurately 246.25 mg of dibenzylamine was taken in 25.00 mL volumetric flask (grade A) and dissolved and made the volume with methanol (HPLC grade, purity 99.95%). Using this stock solution of 0.05 (M) respective standard solutions of 0.01, 0.02, 0.03, 0.04 (M) were made in 10.00 mL volumetric flasks with methanol solvent. All the 5 flasks were inverted to ensure complete dissolution. 1.0  $\mu$ L of each solution was injected in GC and collected the area under the curve of the peak. Area under the peak was plotted in respect to the concentration of each solution. Slope and intercept were measured after the linear fit of the data points. Regression ( $R^2$ ) value 0.9901 signifies the high degree of linear fitness with the data points.

*GC condition:* Shimadzu 2010, HP-5 column (30 m x 0.25mm x 1.00  $\mu$ m), FID (250°C), Injection temp. 250 °C. Temperature 80 °C at 15 °C/min until 200 °C, 5 °C/min until 300 °C, 5 min hold. RT 21.3 min.

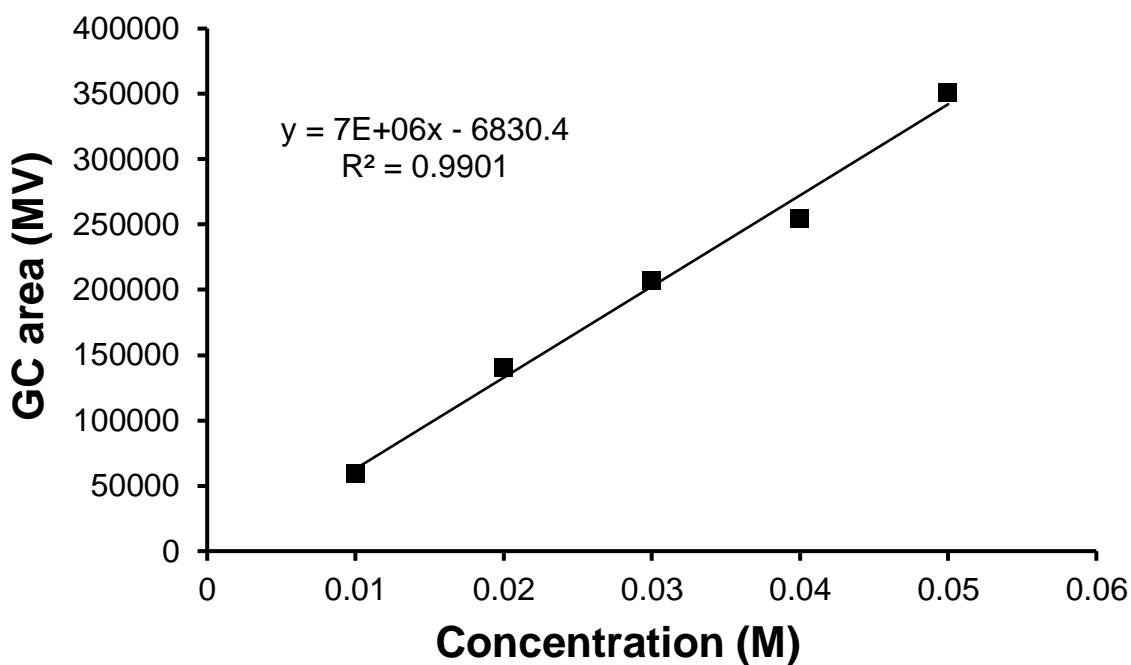

| Conc. (M) | GC area in mV |
|-----------|---------------|
| 0.01      | 59104         |
| 0.02      | 140512        |
| 0.03      | 207312        |
| 0.04      | 254700        |
| 0.05      | 350905        |

**Fig. S51** GC calibration curve for various concentrations of benzylamine.



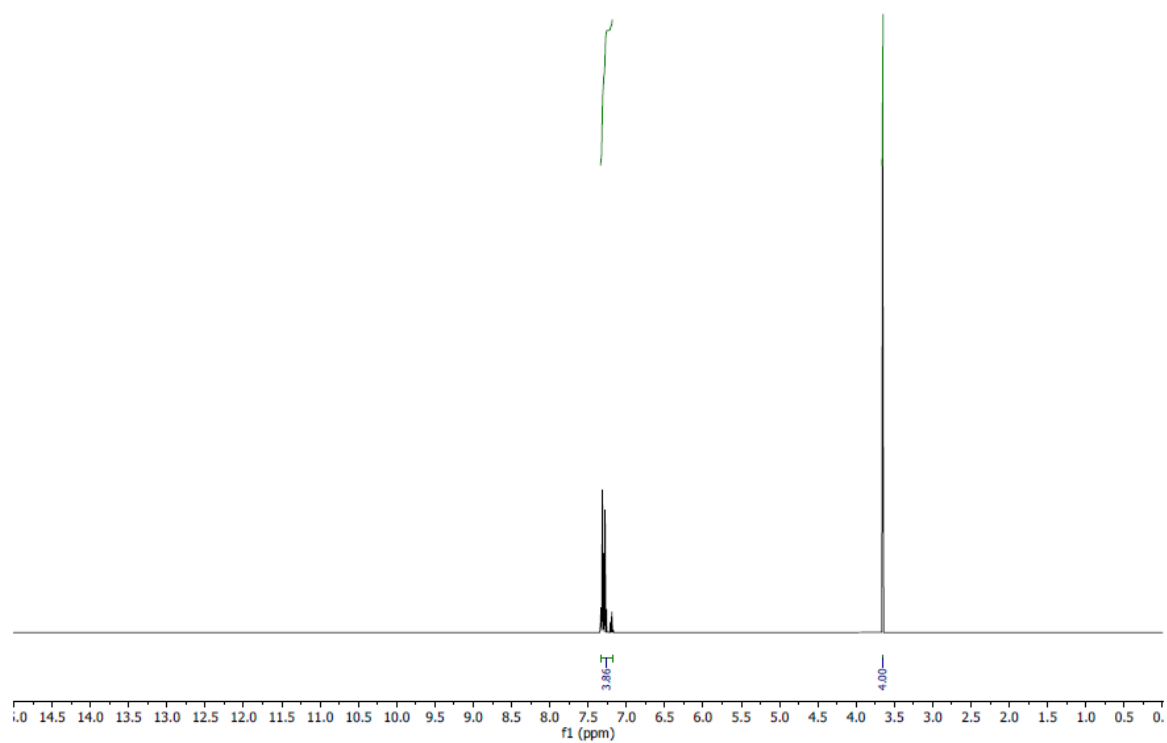

**Fig. S52**  $^1\text{H}$  NMR of dibenzylamine (3j).

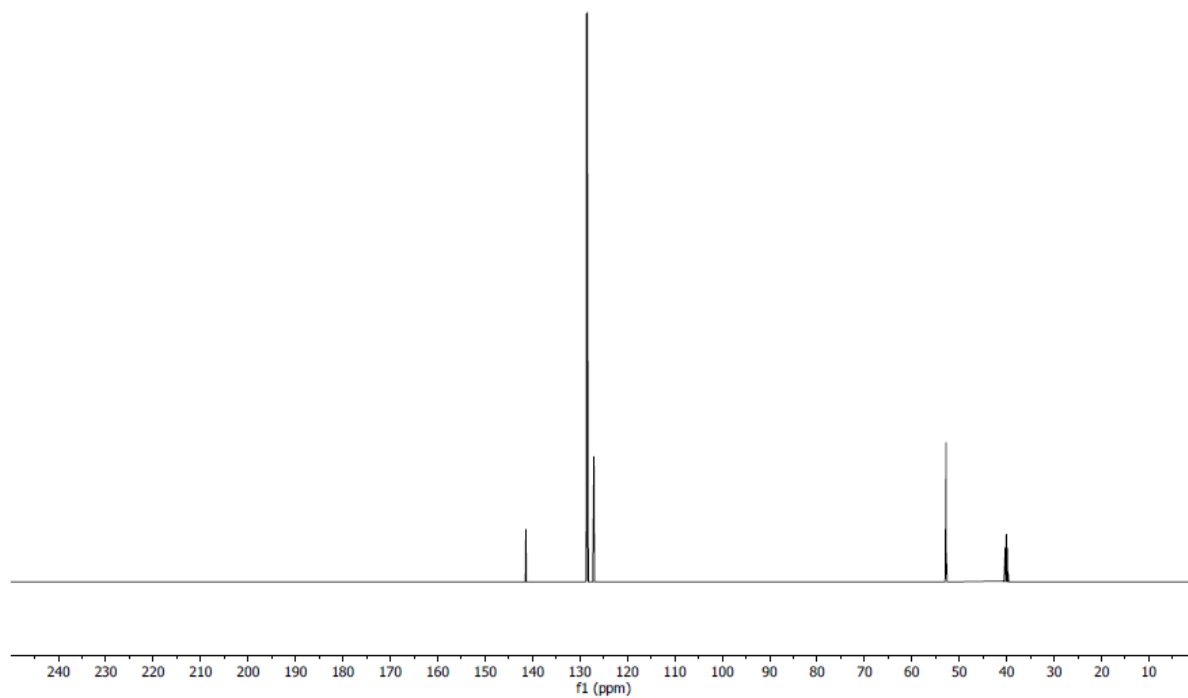

**Fig. S53**  $^{13}\text{C}$  NMR of dibenzylamine (3j).

## Thermodynamic parameter calculation

Changes of Gibbs free energy ( $\Delta G$ ), entropy ( $\Delta S$ ), and enthalpy ( $\Delta H$ ) under reaction conditions were calculated using ASPEN plus v10 to check spontaneity of reaction mentioned in eq 1. Data presented in Table S2 indicate that the reaction is thermodynamically controlled. Therefore, such an inherent limitation of yield could be overcome by higher catalyst loading.

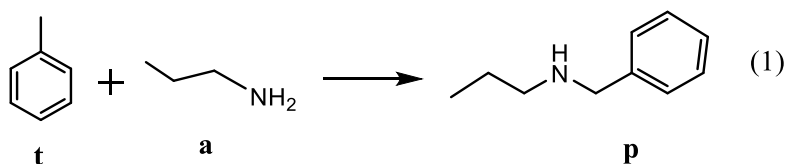

**Table S2** Calculation of thermodynamic parameter for the eq. 1.

| Temperature (°C) | $\Delta G$ (KJ/mol) | $\Delta H$ (KJ/mol) | $\Delta S$ KJ/K       |
|------------------|---------------------|---------------------|-----------------------|
| 110              | 0.000136            | -0.00108            | $-3.2 \times 10^{-6}$ |
